# Supplementary material
Source: PubMed Central journal article supplement (PMC3368653)
Supplement: cn100007x_si_001.pdf [file cn100007x_si_001.pdf]

| Pub-Name           | Set   | Target Mechanism    | MW    | CLOGP | TPSA  | CLOGD | HBD | PKA  | LE   | LLE   | LELP  | Papp Op | Papp Mean | Papp SD |
|--------------------|-------|---------------------|-------|-------|-------|-------|-----|------|------|-------|-------|---------|-----------|---------|
| Acamprosate        | Drugs | Glutamate receptors | 181.2 | -2.5  | 83.5  | -6.1  | 2   | 1.0  | 0.41 | 9.32  | -6.07 |         |           |         |
| Alprazolam         | Drugs | Gaba Receptors      | 308.8 | 2.6   | 43.1  | 2.5   | 0   | 1.9  | 0.55 | 6.14  | 4.65  |         |           |         |
| Amfebutamone       | Drugs | Dopaminergic GPCR   | 239.7 | 3.2   | 29.1  | 3.3   | 1   | 7.2  | 0.56 | 3.11  | 5.75  | =       | 32.1      | 3.7     |
| Amisulpride        | Drugs | Dopaminergic GPCR   | 369.5 | 1.8   | 101.7 | -0.2  | 3   | 9.0  | 0.50 | 9.12  | 3.62  | =       | 1.1       | 0.0     |
| Amphetamine        | Drugs | Reuptake Inhibitors | 135.2 | 1.7   | 26.0  | -0.6  | 2   | 9.9  | 1.06 | 8.22  | 1.64  |         |           |         |
| Aniracetam         | Drugs |                     | 219.2 | 0.7   | 46.6  | 0.3   | 0   | 1.0  |      |       |       |         |           |         |
| Apomorphine        | Drugs | Dopaminergic GPCR   | 267.3 | 2.5   | 43.7  | 2.5   | 2   | 7.9  | 0.59 | 5.93  | 4.21  | =       | 2.7       | 0.0     |
| Aprepitant         | Drugs |                     | 534.4 | 4.6   | 83.2  | 4.1   | 2   | 4.0  | 0.37 | 5.60  | 12.52 | =       | 4.4       | 3.2     |
| Aripiprazole       | Drugs | Dopaminergic GPCR   | 448.4 | 5.3   | 44.8  | 5.5   | 1   | 6.7  | 0.43 | 3.59  | 12.47 |         |           |         |
| Atomoxetine        | Drugs | Reuptake Inhibitors | 255.4 | 3.9   | 21.3  | 0.7   | 1   | 10.1 | 0.61 | 7.59  | 6.44  | =       | 16.7      | 9.8     |
| Bromazepam         | Drugs | Gaba Receptors      | 316.2 | 1.7   | 54.4  | 2.1   | 1   | 2.0  | 0.54 | 5.29  | 3.15  | =       | 27.5      | 0.0     |
| Bromocriptine      | Drugs | Dopaminergic GPCR   | 654.6 | 6.6   | 118.2 | 5.1   | 3   | 6.7  | 0.28 | 3.63  | 23.25 | =       | 5.5       | 3.5     |
| Brotizolam         | Drugs | Gaba Receptors      | 393.7 | 2.7   | 43.1  | 2.3   | 0   | 2.2  | 0.52 | 5.81  | 5.22  | =       | 30.8      | 0.0     |
| Budipine           | Drugs | Calcium Channels    | 293.4 | 5.6   | 3.2   | 2.4   | 0   | 9.7  | 0.27 | 1.85  | 20.76 |         |           |         |
| Buprenorphine      | Drugs | Opioid Receptor     | 467.6 | 4.0   | 62.2  | 2.5   | 2   | 8.3  | 0.41 | 7.50  | 9.73  |         |           |         |
| Buspirone          | Drugs | Serotonergic GPCR   | 385.5 | 2.2   | 69.6  | 3.4   | 0   | 6.7  | 0.38 | 4.23  | 5.75  | =       | 30.0      | 4.6     |
| Cabergoline        | Drugs | Dopaminergic GPCR   | 451.6 | 4.2   | 71.7  | 0.0   | 2   | 9.4  | 0.38 | 9.03  | 10.90 | =       | 1.3       | 0.1     |
| Caffeine           | Drugs | Serotonergic GPCR   | 194.2 | 0.0   | 61.8  | -0.1  | 0   | 1.0  | 0.50 | 5.11  | -0.08 | =       | 37.4      | 0.0     |
| Carbamazepine      | Drugs | Reuptake Inhibitors | 236.3 | 2.4   | 46.3  | 2.7   | 2   | 1.0  | 0.34 | 1.67  | 7.06  | =       | 36.1      | 2.2     |
| Carisoprodol       | Drugs |                     | 260.3 | 2.3   | 90.7  | 2.2   | 3   | 1.0  |      |       |       |         |           |         |
| Chlorpromazine     | Drugs | Dopaminergic GPCR   | 318.9 | 5.3   | 6.5   | 2.9   | 0   | 9.4  | 0.53 | 5.13  | 9.94  |         |           |         |
| Citalopram         | Drugs | Serotonergic GPCR   | 324.4 | 3.1   | 36.3  | 0.4   | 0   | 9.6  | 0.50 | 8.13  | 6.30  | =       | 15.1      | 3.9     |
| Clomipramine       | Drugs | Serotonergic GPCR   | 314.9 | 5.9   | 6.5   | 3.5   | 0   | 9.5  | 0.63 | 6.31  | 9.44  | =       | 1.9       | 0.7     |
| Clonazepam         | Drugs | Gaba Receptors      | 315.7 | 2.4   | 84.6  | 2.3   | 1   | 1.6  | 0.57 | 6.56  | 4.21  | =       | 31.1      | 0.0     |
| Clozapine          | Drugs | Serotonergic GPCR   | 326.8 | 3.7   | 30.9  | 3.4   | 1   | 7.1  | 0.52 | 5.24  | 7.11  | =       | 6.8       | 2.9     |
| Cyclobenzaprine    | Drugs |                     | 275.4 | 5.1   | 3.2   | 3.3   | 0   | 9.2  |      |       |       |         |           |         |
| Dexmethylphenidate | Drugs | Dopaminergic GPCR   | 233.3 | 2.6   | 38.3  | -0.3  | 1   | 10.6 |      |       |       |         |           |         |
| Dextropropoxyphene | Drugs | Opioid Receptor     | 339.5 | 5.2   | 29.5  | 3.7   | 0   | 9.2  | 0.55 | 6.23  | 9.41  |         |           |         |
| Diazepam           | Drugs | Gaba Receptors      | 284.7 | 3.0   | 32.7  | 3.0   | 0   | 3.4  | 0.45 | 3.52  | 6.53  |         |           |         |
| Donepezil          | Drugs | Enzyme              | 379.5 | 4.6   | 38.8  | 3.3   | 0   | 8.8  | 0.38 | 4.34  | 12.04 | =       | 21.9      | 8.2     |
| Dronabinol         | Drugs | Cannabinoids        | 314.5 | 7.2   | 29.5  | 7.7   | 1   | 1.0  | 0.47 | -0.01 | 15.50 |         |           |         |
| Duloxetine         | Drugs | Serotonergic GPCR   | 297.4 | 4.3   | 21.3  | 1.2   | 1   | 10.0 | 0.61 | 7.86  | 7.02  |         |           |         |
| Eletriptan         | Drugs | Serotonergic GPCR   | 382.5 | 3.4   | 53.2  | 0.3   | 1   | 10.4 | 0.45 | 8.48  | 7.38  | =       | 9.1       | 4.0     |
| Escitalopram       | Drugs | Serotonergic GPCR   | 324.4 | 3.1   | 36.3  | 0.4   | 0   | 9.6  | 0.52 | 8.56  | 6.00  | =       | 16.1      | 0.8     |
| Eszopiclone        | Drugs | Gaba Receptors      | 388.8 | 1.3   | 91.8  | 0.7   | 0   | 6.8  | 0.36 | 6.34  | 3.46  |         |           |         |
| Ethosuximide       | Drugs | Calcium Channels    | 141.2 | 0.4   | 46.2  | 0.4   | 1   | 1.0  | 0.88 | 5.88  | 0.45  |         |           |         |
| Felbamate          | Drugs | Gaba Receptors      | 238.2 | 0.5   | 104.6 | 1.2   | 4   | 1.0  |      |       |       |         |           |         |

| Pub-Name             | Set   | Target Mechanism    | MW    | CLOGP | TPSA  | CLOGD | HBD | PKA  | LE   | LLE   | LELP  | Papp Op | Papp Mean | Papp SD |
|----------------------|-------|---------------------|-------|-------|-------|-------|-----|------|------|-------|-------|---------|-----------|---------|
| Fentanyl             | Drugs | Opioid Receptor     | 336.5 | 3.6   | 23.6  | 2.5   | 0   | 9.1  | 0.48 | 6.01  | 7.57  |         |           |         |
| Flumazenil           | Drugs | Gaba Receptors      | 303.3 | 1.3   | 64.4  | 0.9   | 0   | 1.1  | 0.59 | 8.44  | 2.18  | =       | 30.8      | 4.3     |
| Fluoxetine           | Drugs | Serotonergic GPCR   | 309.3 | 4.6   | 21.3  | 1.6   | 1   | 10.1 | 0.57 | 7.40  | 8.01  | =       | 2.1       | 1.3     |
| Fluvoxamine          | Drugs | Serotonergic GPCR   | 318.3 | 3.3   | 56.8  | 1.2   | 2   | 9.4  | 0.55 | 7.49  | 6.04  | =       | 7.5       | 3.6     |
| Gabapentin           | Drugs | Calcium Channels    | 171.2 | -0.7  | 63.3  | -1.3  | 3   | 10.3 | 0.77 | 7.91  | -0.86 |         |           |         |
| Galantamine          | Drugs | Enzyme              | 287.4 | 1.0   | 41.9  | 1.1   | 1   | 7.9  | 0.62 | 8.24  | 1.64  | =       | 15.6      | 0.0     |
| Haloperidol          | Drugs | Dopaminergic GPCR   | 375.9 | 3.8   | 40.5  | 2.1   | 1   | 8.3  | 0.47 | 6.65  | 8.22  |         |           |         |
| Hydrocodone          | Drugs | Opioid Receptor     | 299.4 | 1.1   | 38.8  | 0.7   | 0   | 8.5  |      |       |       | =       | 29.5      | 0.0     |
| Indeloxazine         | Drugs | Reuptake Inhibitors | 231.3 | 2.2   | 30.5  | 0.4   | 1   | 8.5  | 0.64 | 7.31  | 3.46  | =       | 25.2      | 0.0     |
| Lamotrigine          | Drugs | Reuptake Inhibitors | 256.1 | 2.5   | 90.7  | -0.2  | 4   | 5.4  | 0.44 | 5.19  | 5.79  | =       | 24.7      | 4.0     |
| Levetiracetam        | Drugs | Calcium Channels    | 170.2 | -0.3  | 63.4  | -0.7  | 2   | 1.0  | 0.56 | 5.50  | -0.61 |         |           |         |
| Levomethadyl Acetate | Drugs | Opioid Receptor     | 353.5 | 4.6   | 29.5  | 3.5   | 0   | 9.4  |      |       |       |         |           |         |
| Lofexidine           | Drugs |                     | 259.1 | 3.5   | 33.6  | 1.7   | 1   | 9.8  |      |       |       |         |           |         |
| Lorazepam            | Drugs | Gaba Receptors      | 321.2 | 2.4   | 61.7  | 2.5   | 2   | 1.0  | 0.58 | 6.27  | 4.06  | =       | 24.7      | 2.4     |
| Meprobamate          | Drugs |                     | 218.3 | 0.9   | 104.6 | 0.7   | 4   | 1.0  |      |       |       |         |           |         |
| Methylphenidate      | Drugs | Dopaminergic GPCR   | 233.3 | 2.6   | 38.3  | -0.3  | 1   | 10.6 | 0.58 | 7.36  | 4.38  | =       | 28.3      | 0.0     |
| Metoclopramide       | Drugs |                     | 299.8 | 2.2   | 67.6  | 0.0   | 3   | 9.7  |      |       |       |         |           |         |
| Midazolam            | Drugs | Gaba Receptors      | 325.8 | 3.4   | 30.2  | 3.9   | 0   | 5.6  | 0.53 | 4.85  | 6.41  |         |           |         |
| Milnacipran          | Drugs | Serotonergic GPCR   | 246.3 | 1.9   | 46.3  | -1.5  | 2   | 10.4 | 0.54 | 8.43  | 3.55  |         |           |         |
| Minaprine            | Drugs | Enzyme              | 298.4 | 3.2   | 50.3  | 1.2   | 1   | 7.1  |      |       |       | =       | 36.6      | 0.0     |
| Mirtazapine          | Drugs |                     | 265.4 | 2.8   | 19.4  | 2.1   | 0   | 8.1  |      |       |       | =       | 25.9      | 7.0     |
| Moclobemide          | Drugs | Enzyme              | 268.7 | 2.2   | 41.6  | 0.7   | 1   | 6.9  | 0.27 | 2.73  | 8.11  | =       | 35.2      | 13.9    |
| Modafinil            | Drugs | Dopaminergic GPCR   | 273.4 | 0.9   | 60.2  | 1.2   | 2   | 1.0  |      |       |       |         |           |         |
| Morphine             | Drugs | Opioid Receptor     | 285.3 | 0.6   | 52.9  | -0.4  | 2   | 8.3  | 0.61 | 9.55  | 0.94  |         |           |         |
| Nalmefene            | Drugs | Opioid Receptor     | 339.4 | 2.6   | 52.9  | 2.1   | 2   | 7.7  | 0.50 | 6.90  | 5.24  |         |           |         |
| Naltrexone           | Drugs | Opioid Receptor     | 341.4 | 0.4   | 70.0  | 1.4   | 2   | 7.5  | 0.56 | 8.61  | 0.64  | =       | 20.4      | 3.7     |
| Nemonapride          | Drugs | Dopaminergic GPCR   | 387.9 | 4.2   | 53.6  | 2.0   | 2   | 8.4  | 0.56 | 8.83  | 7.46  | =       | 20.6      | 0.0     |
| Nicergoline          | Drugs |                     | 484.4 | 4.1   | 56.6  | 3.8   | 0   | 7.8  |      |       |       |         |           |         |
| Nicotrol             | Drugs | Nicotinic Receptor  | 162.2 | 0.9   | 16.1  | -0.5  | 0   | 8.0  | 1.05 | 9.47  | 0.84  | =       | 28.1      | 4.2     |
| Nimodipine           | Drugs | Calcium Channels    | 418.4 | 4.0   | 117.0 | 3.9   | 1   | 2.8  | 0.17 | -0.17 | 23.30 | =       | 15.4      | 0.0     |
| Nortriptyline        | Drugs |                     | 263.4 | 4.3   | 12.0  | 3.2   | 1   | 10.0 |      |       |       |         |           |         |
| Olanzapine           | Drugs | Dopaminergic GPCR   | 312.4 | 3.0   | 30.9  | 2.5   | 1   | 7.8  | 0.51 | 5.50  | 5.91  | =       | 18.8      | 11.8    |
| Oxcarbazepine        | Drugs | Reuptake Inhibitors | 252.3 | 1.2   | 63.4  | 1.3   | 2   | 1.0  | 0.28 | 2.54  | 4.31  |         |           |         |
| Oxycodone            | Drugs | Opioid Receptor     | 315.4 | 0.0   | 59.0  | 1.2   | 1   | 7.6  | 0.45 | 6.15  | -0.09 | =       | 28.3      | 0.0     |
| Paliperidone         | Drugs | Dopaminergic GPCR   | 426.5 | 1.1   | 84.4  | 1.0   | 1   | 7.9  | 0.39 | 7.59  | 2.78  | =       | 21.5      | 0.0     |
| Paroxetine           | Drugs | Serotonergic GPCR   | 329.4 | 4.2   | 39.7  | 1.2   | 1   | 10.3 | 0.61 | 9.21  | 6.99  | =       | 1.0       | 0.2     |
| Pergolide            | Drugs | Dopaminergic GPCR   | 314.5 | 4.4   | 19.0  | 2.2   | 1   | 9.7  | 0.49 | 5.55  | 8.95  | =       | 9.7       | 6.3     |

| Pub-Name      | Set   | Target Mechanism    | MW    | CLOGP | TPSA  | CLOGD | HBD | PKA  | LE   | LLE   | LELP  | Papp Op | Papp Mean | Papp SD |
|---------------|-------|---------------------|-------|-------|-------|-------|-----|------|------|-------|-------|---------|-----------|---------|
| Perospirone   | Drugs | Dopaminergic GPCR   | 426.6 | 3.8   | 56.8  | 2.4   | 0   | 8.4  | 0.43 | 6.85  | 8.73  |         |           |         |
| phenytoin     | Drugs | Reuptake Inhibitors | 252.3 | 2.1   | 58.2  | 2.5   | 2   | 1.0  | 0.67 | 6.54  | 3.13  | =       | 28.6      | 2.6     |
| Piracetam     | Drugs |                     | 142.2 | -1.2  | 63.4  | -1.6  | 2   | 1.0  |      |       |       |         |           |         |
| Pramipexole   | Drugs | Dopaminergic GPCR   | 211.3 | 1.2   | 50.9  | -0.5  | 3   | 9.5  | 0.93 | 9.84  | 1.25  | =       | 12.8      | 0.0     |
| Pregabalin    | Drugs | Calcium Channels    | 159.2 | -0.9  | 63.3  | -1.4  | 3   | 11.3 | 0.88 | 8.30  | -1.04 |         |           |         |
| Propofol      | Drugs |                     | 178.3 | 3.9   | 20.2  | 4.2   | 1   | 1.0  |      |       |       |         |           |         |
| Propoxyphene  | Drugs |                     | 339.5 | 5.2   | 29.5  | 3.7   | 0   | 9.2  |      |       |       |         |           |         |
| Quazepam      | Drugs | Gaba Receptors      | 386.8 | 3.2   | 15.6  | 4.1   | 0   | 1.0  | 0.43 | 3.59  | 7.42  |         |           |         |
| Quetiapine    | Drugs | Serotonergic GPCR   | 383.5 | 3.0   | 48.3  | 1.6   | 1   | 5.8  | 0.36 | 5.41  | 8.29  | =       | 21.8      | 1.4     |
| Ramelteon     | Drugs | Melatonin Receptor  | 259.3 | 2.5   | 38.3  | 2.6   | 1   | 1.0  | 0.80 | 8.29  | 3.11  | =       | 33.4      | 1.9     |
| Rasagiline    | Drugs | Enzyme              | 171.2 | 2.5   | 12.0  | 1.9   | 1   | 7.5  | 0.85 | 5.93  | 2.98  |         |           |         |
| Reboxetine    | Drugs | Reuptake Inhibitors | 313.4 | 3.3   | 39.7  | 1.8   | 1   | 8.4  | 0.49 | 6.25  | 6.66  | =       | 12.2      | 0.0     |
| Remifentanyl  | Drugs | Opioid Receptor     | 376.4 | 2.0   | 76.2  | 2.0   | 0   | 6.6  |      |       |       |         |           |         |
| Riluzole      | Drugs | Reuptake Inhibitors | 234.2 | 3.2   | 48.1  | 2.8   | 2   | 3.6  | 0.41 | 1.55  | 7.89  | =       | 30.4      | 5.3     |
| Rimonabant    | Drugs | Cannabinoids        | 463.8 | 6.5   | 50.2  | 6.0   | 1   | 3.2  | 0.38 | 2.20  | 16.88 | =       | 3.5       | 1.8     |
| Risperidone   | Drugs | Dopaminergic GPCR   | 410.5 | 2.7   | 64.2  | 2.3   | 0   | 7.9  | 0.44 | 7.23  | 6.10  | =       | 23.2      | 10.9    |
| Rivastigmine  | Drugs | Enzyme              | 250.3 | 2.1   | 32.8  | 0.9   | 0   | 8.6  | 0.43 | 4.65  | 4.83  | =       | 27.3      | 4.8     |
| Ropinirole    | Drugs | Dopaminergic GPCR   | 260.4 | 2.8   | 32.3  | 1.2   | 1   | 9.5  | 0.60 | 6.94  | 4.66  | =       | 26.9      | 7.0     |
| Ropivacaine   | Drugs |                     | 274.4 | 3.2   | 32.3  | 2.6   | 1   | 8.2  |      |       |       | =       | 43.4      | 0.0     |
| Selegiline    | Drugs | Enzyme              | 187.3 | 3.0   | 3.2   | 2.6   | 0   | 7.5  | 0.82 | 5.59  | 3.70  | =       | 25.9      | 0.0     |
| Sertindole    | Drugs | Serotonergic GPCR   | 440.9 | 5.3   | 40.5  | 3.8   | 1   | 9.1  | 0.45 | 6.05  | 11.84 | =       | 0.1       | 0.0     |
| Sertraline    | Drugs | Serotonergic GPCR   | 306.2 | 5.3   | 12.0  | 2.8   | 1   | 9.5  | 0.67 | 6.82  | 7.97  | =       | 2.2       | 0.0     |
| Sinequan      | Drugs | Serotonergic GPCR   | 279.4 | 4.1   | 12.5  | 2.1   | 0   | 9.2  | 0.50 | 5.49  | 8.11  | =       | 10.4      | 0.0     |
| Sulpiride     | Drugs | Dopaminergic GPCR   | 341.4 | 1.1   | 101.7 | -1.4  | 3   | 9.0  | 0.50 | 9.57  | 2.23  | =       | 0.3       | 0.0     |
| Tacrine       | Drugs | Enzyme              | 198.3 | 3.3   | 38.9  | 1.1   | 2   | 9.6  | 0.70 | 6.47  | 4.66  | =       | 30.1      | 7.5     |
| Talipexole    | Drugs | Dopaminergic GPCR   | 209.3 | 1.1   | 42.2  | 1.0   | 2   | 7.2  | 0.63 | 5.29  | 1.82  | =       | 22.9      | 6.7     |
| Terguride     | Drugs | Dopaminergic GPCR   | 340.5 | 2.8   | 51.4  | 1.4   | 2   | 9.8  | 0.53 | 8.00  | 5.25  |         |           |         |
| Thiopental    | Drugs | Gaba Receptors      | 242.3 | 1.8   | 58.5  | -0.7  | 1   | 1.0  |      |       |       |         |           |         |
| Tiagabine     | Drugs | Gaba Receptors      | 375.5 | 2.8   | 40.5  | 3.2   | 1   | 9.4  | 0.39 | 3.79  | 7.12  | =       | 20.7      | 1.9     |
| Tianeptine    | Drugs | Reuptake Inhibitors | 437.0 | 1.5   | 86.7  | 0.4   | 2   | 7.5  |      |       |       | =       | 22.7      | 5.2     |
| Topiramate    | Drugs | Enzyme              | 339.4 | 0.0   | 115.5 | 3.0   | 2   | 1.0  | 0.58 | 6.09  | 0.07  |         |           |         |
| Tramadol      | Drugs | Reuptake Inhibitors | 263.4 | 3.1   | 32.7  | 0.5   | 1   | 9.6  | 0.46 | 5.71  | 6.78  |         |           |         |
| Trazodone     | Drugs | Serotonergic GPCR   | 371.9 | 3.9   | 45.8  | 1.6   | 0   | 6.7  | 0.43 | 6.31  | 9.03  |         |           |         |
| Tropisetron   | Drugs | Serotonergic GPCR   | 284.4 | 2.9   | 45.3  | 1.0   | 1   | 10.0 | 0.58 | 7.66  | 4.97  |         |           |         |
| Valproic Acid | Drugs |                     | 144.2 | 2.8   | 37.3  | 0.2   | 1   | 1.0  |      |       |       |         |           |         |
| Varenicline   | Drugs | Nicotinic Receptor  | 211.3 | 0.9   | 37.8  | -1.3  | 1   | 9.6  | 0.87 | 11.29 | 1.03  | =       | 24.6      | 0.0     |
| Venlafaxine   | Drugs | Serotonergic GPCR   | 277.4 | 3.3   | 32.7  | 1.2   | 1   | 9.3  | 0.52 | 6.27  | 6.26  | =       | 20.7      | 6.1     |

| Pub-Name      | Set        | Target Mechanism    | MW    | CLOGP | TPSA  | CLOGD | HBD | PKA  | LE   | LLE   | LELP  | Papp Op | Papp Mean | Papp SD |
|---------------|------------|---------------------|-------|-------|-------|-------|-----|------|------|-------|-------|---------|-----------|---------|
| Verapamil     | Drugs      | Calcium Channels    | 454.6 | 4.5   | 64.0  | 2.3   | 0   | 9.0  | 0.38 | 6.52  | 11.89 |         |           |         |
| Vigabatrin    | Drugs      | Gaba Receptors      | 129.2 | -2.2  | 63.3  | -2.6  | 3   | 10.6 | 0.40 | 5.19  | -5.51 |         |           |         |
| Vinpocetine   | Drugs      |                     | 350.5 | 4.8   | 34.5  | 4.6   | 0   | 7.8  |      |       |       | =       | 4.7       | 1.6     |
| Zaleplon      | Drugs      | Gaba Receptors      | 305.3 | 1.4   | 74.3  | 0.9   | 0   | 1.0  | 0.45 | 6.47  | 3.21  | =       | 37.1      | 0.0     |
| Ziprasidone   | Drugs      | Dopaminergic GPCR   | 412.9 | 4.2   | 48.5  | 3.1   | 1   | 8.4  | 0.45 | 5.85  | 9.44  | =       | 10.3      | 0.0     |
| Zolpidem      | Drugs      | Gaba Receptors      | 307.4 | 3.0   | 37.6  | 2.9   | 0   | 6.6  | 0.47 | 4.85  | 6.44  | =       | 80.3      | 0.0     |
| Zonisamide    | Drugs      | Enzyme              | 212.2 | -0.4  | 86.2  | -0.1  | 2   | 1.0  | 0.83 | 8.40  | -0.44 | =       | 29.1      | 0.0     |
| Zotepine      | Drugs      | Serotonergic GPCR   | 331.9 | 5.1   | 12.5  | 5.2   | 0   | 8.7  | 0.55 | 3.35  | 9.35  |         |           |         |
| Candidate-001 | Candidates | Glutamate receptors | 276.2 | -0.5  | 112.1 | 0.3   | 2   | 6.9  | 0.50 | 6.83  | -0.91 |         |           |         |
| Candidate-002 | Candidates | Reuptake Inhibitors | 255.3 | 3.7   | 21.3  | 1.7   | 1   | 9.1  | 0.62 | 6.25  | 5.93  | =       | 7.8       | 5.6     |
| Candidate-003 | Candidates | Reuptake Inhibitors | 326.2 | 5.5   | 21.3  | 2.7   | 1   | 10.1 | 0.57 | 5.94  | 9.55  | =       | 11.4      | 8.2     |
| Candidate-004 | Candidates | Serotonergic GPCR   | 391.5 | 2.0   | 78.5  | 0.0   | 2   | 10.3 | 0.40 | 7.78  | 4.92  |         |           |         |
| Candidate-005 | Candidates | Enzyme              | 375.5 | 3.9   | 58.4  | 2.1   | 1   | 8.8  | 0.48 | 7.47  | 8.23  |         |           |         |
| Candidate-006 | Candidates | Peptide GPCR        | 379.5 | 2.6   | 53.6  | 0.2   | 2   | 9.9  | 0.50 | 9.83  | 5.23  | =       | 8.4       | 1.4     |
| Candidate-007 | Candidates | Enzyme              | 311.4 | 4.1   | 51.4  | 2.3   | 2   | 8.7  | 0.46 | 5.22  | 8.97  | =       | 1.0       | 0.0     |
| Candidate-008 | Candidates | Calcium Channels    | 159.2 | -0.8  | 63.3  | -1.1  | 3   | 10.6 | 0.96 | 8.59  | -0.89 |         |           |         |
| Candidate-009 | Candidates | Nicotinic Receptor  | 269.1 | 1.0   | 34.0  | -2.2  | 1   | 10.2 | 0.90 | 11.81 | 1.10  |         |           |         |
| Candidate-010 | Candidates | Opioid Receptor     | 372.5 | 4.7   | 49.4  | 2.3   | 1   | 9.4  | 0.48 | 6.59  | 9.76  | =       | 18.4      | 0.3     |
| Candidate-011 | Candidates | Dopaminergic GPCR   | 436.5 | 3.7   | 87.2  | 3.1   | 1   | 6.6  | 0.40 | 5.75  | 9.23  |         |           |         |
| Candidate-012 | Candidates | Peptide GPCR        | 459.6 | 5.5   | 80.2  | 5.4   | 1   | 5.1  | 0.33 | 2.64  | 16.65 | =       | 5.0       | 1.8     |
| Candidate-013 | Candidates | Enzyme              | 378.5 | 5.3   | 33.2  | 3.0   | 0   | 8.8  | 0.43 | 5.25  | 12.42 | =       | 11.4      | 0.0     |
| Candidate-014 | Candidates | Opioid Receptor     | 396.5 | 3.3   | 45.9  | 1.8   | 0   | 9.9  | 0.35 | 5.44  | 9.52  | =       | 19.9      | 0.0     |
| Candidate-015 | Candidates | Nicotinic Receptor  | 271.3 | 1.7   | 58.4  | -0.9  | 1   | 9.1  | 0.62 | 9.70  | 2.69  |         |           |         |
| Candidate-016 | Candidates | Gaba Receptors      | 336.4 | 2.0   | 61.4  | 2.2   | 0   | 6.2  | 0.48 | 6.40  | 4.15  | =       | 31.5      | 2.9     |
| Candidate-017 | Candidates | Enzyme              | 468.5 | 2.2   | 105.8 | 0.3   | 1   | 5.7  | 0.40 | 9.38  | 5.48  | =       | 20.6      | 14.0    |
| Candidate-018 | Candidates | Cannabinoids        | 436.3 | 5.6   | 38.1  | 4.9   | 0   | 1.0  | 0.45 | 4.28  | 12.60 | =       | 6.1       | 1.9     |
| Candidate-019 | Candidates | Peptide GPCR        | 392.9 | 6.0   | 80.7  | 6.3   | 2   | 4.0  | 0.42 | 1.94  | 14.04 | =       | 7.8       | 0.0     |
| Candidate-020 | Candidates | Glutamate receptors | 402.5 | 3.2   | 66.3  | 2.2   | 1   | 8.1  | 0.41 | 6.05  | 7.75  | =       | 14.9      | 0.0     |
| Candidate-021 | Candidates | Enzyme              | 315.4 | 3.1   | 60.6  | 1.1   | 2   | 8.6  | 0.47 | 6.55  | 6.56  | =       | 5.4       | 5.1     |
| Candidate-022 | Candidates | Enzyme              | 489.6 | 5.6   | 71.0  | 2.1   | 3   | 10.4 | 0.36 | 6.85  | 15.66 | =       | 0.5       | 0.8     |
| Candidate-023 | Candidates | Nicotinic Receptor  | 227.2 | 2.6   | 12.0  | -0.2  | 1   | 10.0 | 0.76 | 8.93  | 3.47  | =       | 12.8      | 12.7    |
| Candidate-024 | Candidates | Calcium Channels    | 187.3 | 0.1   | 63.3  | -0.3  | 3   | 11.2 | 0.88 | 8.48  | 0.16  |         |           |         |
| Candidate-025 | Candidates | Reuptake Inhibitors | 319.8 | 4.5   | 21.3  | 1.5   | 1   | 10.3 | 0.53 | 6.79  | 8.52  |         |           |         |
| Candidate-026 | Candidates | Serotonergic GPCR   | 322.8 | 2.9   | 50.3  | 3.8   | 1   | 7.8  | 0.58 | 5.25  | 4.95  | =       | 3.3       | 1.0     |
| Candidate-027 | Candidates | Serotonergic GPCR   | 447.6 | 4.1   | 57.9  | 1.5   | 0   | 8.7  | 0.37 | 7.30  | 10.93 | =       | 4.1       | 5.4     |
| Candidate-028 | Candidates | Histaminergic GPCR  | 322.4 | 2.4   | 32.3  | 0.0   | 1   | 9.2  | 0.53 | 8.75  | 4.54  | =       | 51.5      | 0.0     |
| Candidate-029 | Candidates | Glutamate receptors | 327.4 | 1.8   | 63.9  | 0.8   | 3   | 8.2  | 0.47 | 7.36  | 3.79  | =       | 26.5      | 0.0     |

| Pub-Name      | Set        | Target Mechanism    | MW    | CLOGP | TPSA  | CLOGD | HBD | PKA  | LE   | LLE   | LELP  | Papp Op | Papp Mean | Papp SD |
|---------------|------------|---------------------|-------|-------|-------|-------|-----|------|------|-------|-------|---------|-----------|---------|
| Candidate-030 | Candidates | Peptide GPCR        | 296.4 | 3.4   | 33.3  | 0.8   | 2   | 9.9  | 0.56 | 8.01  | 6.08  | =       | 15.3      | 3.1     |
| Candidate-031 | Candidates | Serotonergic GPCR   | 383.5 | 1.9   | 69.6  | 2.0   | 0   | 6.7  | 0.39 | 5.91  | 4.84  | =       | 32.8      | 8.1     |
| Candidate-032 | Candidates | Gaba Receptors      | 310.4 | 1.1   | 61.4  | 2.3   | 0   | 6.5  | 0.47 | 5.00  | 2.34  | =       | 26.0      | 5.3     |
| Candidate-033 | Candidates | Opioid Receptor     | 426.6 | 3.1   | 69.6  | 0.8   | 2   | 10.3 | 0.45 | 8.72  | 6.98  | =       | 15.7      | 1.1     |
| Candidate-034 | Candidates | Reuptake Inhibitors | 308.4 | 3.5   | 41.1  | 3.3   | 1   | 7.1  | 0.53 | 5.48  | 6.59  | =       | 4.0       | 3.8     |
| Candidate-035 | Candidates | Calcium Channels    | 185.3 | -0.2  | 63.3  | -0.9  | 3   | 10.3 | 0.86 | 8.90  | -0.21 |         |           |         |
| Candidate-036 | Candidates | Peptide GPCR        | 326.5 | 7.6   | 34.2  | 7.1   | 1   | 7.2  | 0.50 | 1.51  | 15.13 |         |           |         |
| Candidate-037 | Candidates | Gaba Receptors      | 324.3 | 2.5   | 74.3  | -2.8  | 2   | 12.4 | 0.51 | 11.59 | 4.95  |         |           |         |
| Candidate-038 | Candidates | Serotonergic GPCR   | 417.5 | 5.1   | 26.8  | 3.6   | 0   | 7.8  | 0.39 | 4.68  | 13.16 |         |           |         |
| Candidate-039 | Candidates | Glutamate receptors | 462.9 | 5.6   | 51.0  | 4.0   | 0   | 8.5  | 0.30 | 3.13  | 18.51 | =       | 3.3       | 0.0     |
| Candidate-040 | Candidates | Enzyme              | 395.5 | -1.5  | 101.8 | -0.7  | 1   | 7.9  | 0.39 | 8.75  | -3.79 | =       | 38.4      | 0.0     |
| Candidate-041 | Candidates | Peptide GPCR        | 380.4 | 4.6   | 42.5  | 1.9   | 2   | 9.9  | 0.54 | 8.43  | 8.54  | =       | 8.4       | 4.0     |
| Candidate-042 | Candidates | Serotonergic GPCR   | 304.8 | 2.9   | 50.3  | 2.8   | 1   | 7.4  | 0.61 | 6.32  | 4.76  |         |           |         |
| Candidate-043 | Candidates | Peptide GPCR        | 394.9 | 2.1   | 50.1  | 0.7   | 0   | 8.7  | 0.42 | 7.81  | 5.02  |         |           |         |
| Candidate-044 | Candidates | Serotonergic GPCR   | 355.4 | 3.3   | 37.4  | 2.5   | 1   | 8.2  | 0.47 | 6.32  | 7.01  | =       | 2.9       | 1.0     |
| Candidate-045 | Candidates | Cannabinoids        | 510.4 | 4.1   | 102.0 | 2.7   | 3   | 7.0  | 0.36 | 6.30  | 11.37 | =       | 9.3       | 5.5     |
| Candidate-046 | Candidates | Serotonergic GPCR   | 448.4 | 5.7   | 26.8  | 4.8   | 0   | 7.7  | 0.46 | 4.80  | 12.19 | =       | 3.9       | 0.0     |
| Candidate-047 | Candidates | Calcium Channels    | 187.3 | 0.1   | 63.3  | -0.2  | 3   | 10.3 | 0.85 | 8.05  | 0.09  |         |           |         |
| Candidate-048 | Candidates | Dopaminergic GPCR   | 430.5 | 5.2   | 57.7  | 4.8   | 1   | 7.1  | 0.40 | 4.32  | 12.88 |         |           |         |
| Candidate-049 | Candidates | Serotonergic GPCR   | 455.0 | 5.7   | 48.5  | 3.5   | 1   | 8.4  | 0.44 | 6.37  | 12.80 | =       | 6.0       | 0.4     |
| Candidate-050 | Candidates | Gaba Receptors      | 373.4 | 2.5   | 83.2  | -0.1  | 3   | 9.3  | 0.46 | 9.07  | 5.27  | =       | 1.7       | 0.1     |
| Candidate-051 | Candidates | Reuptake Inhibitors | 363.3 | 3.7   | 48.3  | 1.9   | 1   | 8.3  | 0.45 | 6.52  | 8.20  | =       | 2.5       | 1.7     |
| Candidate-052 | Candidates | Enzyme              | 385.3 | 3.1   | 52.2  | 5.0   | 1   | 1.0  | 0.39 | 2.30  | 7.93  |         |           |         |
| Candidate-053 | Candidates | Nicotinic Receptor  | 227.2 | 2.6   | 12.0  | -0.2  | 1   | 10.0 | 0.82 | 9.57  | 3.23  | =       | 31.0      | 1.7     |
| Candidate-054 | Candidates | Opioid Receptor     | 319.5 | 6.4   | 3.2   | 5.3   | 0   | 8.6  | 0.39 | 1.34  | 16.32 |         |           |         |
| Candidate-055 | Candidates | Enzyme              | 388.5 | 5.1   | 34.5  | 2.6   | 0   | 8.8  | 0.38 | 5.31  | 13.40 | =       | 7.5       | 6.8     |
| Candidate-056 | Candidates | Enzyme              | 392.5 | 3.8   | 52.8  | 3.5   | 0   | 4.3  | 0.44 | 5.84  | 8.79  | =       | 7.8       | 2.1     |
| Candidate-057 | Candidates | Dopaminergic GPCR   | 391.5 | 4.3   | 39.5  | 4.7   | 0   | 7.3  | 0.42 | 4.04  | 10.15 | =       | 4.9       | 0.0     |
| Candidate-058 | Candidates | Peptide GPCR        | 614.7 | 6.0   | 149.6 | 2.2   | 5   | 1.0  | 0.28 | 6.70  | 21.74 | =       | 0.5       | 0.0     |
| Candidate-059 | Candidates | Dopaminergic GPCR   | 480.9 | 4.9   | 61.5  | 5.8   | 1   | 6.7  | 0.36 | 2.70  | 13.71 |         |           |         |
| Candidate-060 | Candidates | Serotonergic GPCR   | 464.6 | 5.3   | 45.0  | 1.5   | 0   | 9.7  | 0.35 | 6.98  | 15.21 | =       | 3.4       | 0.0     |
| Candidate-061 | Candidates | Histaminergic GPCR  | 350.4 | 3.4   | 32.3  | 0.9   | 1   | 9.2  | 0.50 | 8.10  | 6.64  | =       | 42.7      | 8.0     |
| Candidate-062 | Candidates | Dopaminergic GPCR   | 433.5 | 4.9   | 44.8  | 3.3   | 1   | 6.8  | 0.37 | 5.17  | 13.15 |         |           |         |
| Candidate-063 | Candidates | Nicotinic Receptor  | 288.3 | 1.7   | 50.8  | -0.7  | 1   | 9.7  | 0.54 | 8.75  | 3.07  | =       | 3.8       | 1.0     |
| Candidate-064 | Candidates | Serotonergic GPCR   | 275.7 | 3.7   | 21.3  | 1.4   | 1   | 9.0  | 0.64 | 6.81  | 5.86  | =       | 9.5       | 0.0     |
| Candidate-065 | Candidates | Peptide GPCR        | 417.3 | 6.2   | 63.0  | 3.8   | 2   | 6.3  | 0.48 | 5.06  | 12.93 | =       | 14.9      | 0.0     |
| Candidate-066 | Candidates | Serotonergic GPCR   | 436.6 | 3.3   | 59.9  | 2.2   | 1   | 7.8  | 0.39 | 6.74  | 8.50  | =       | 18.7      | 2.8     |

| Pub-Name      | Set        | Target Mechanism    | MW    | CLOGP | TPSA  | CLOGD | HBD | PKA  | LE   | LLE  | LELP  | Papp Op | Papp Mean | Papp SD |
|---------------|------------|---------------------|-------|-------|-------|-------|-----|------|------|------|-------|---------|-----------|---------|
| Candidate-067 | Candidates | Dopaminergic GPCR   | 463.5 | 5.4   | 69.7  | 4.3   | 2   | 6.8  | 0.36 | 4.58 | 14.82 |         |           |         |
| Candidate-068 | Candidates | Serotonergic GPCR   | 469.0 | 6.2   | 48.5  | 4.8   | 1   | 8.4  | 0.42 | 4.86 | 14.71 | =       | 2.8       | 0.0     |
| Candidate-069 | Candidates | Reuptake Inhibitors | 300.2 | 5.1   | 21.3  | 3.4   | 1   | 9.0  | 0.63 | 5.13 | 8.09  | =       | 9.3       | 0.0     |
| Candidate-070 | Candidates | Dopaminergic GPCR   | 221.3 | 1.3   | 42.2  | 1.1   | 2   | 7.0  | 0.66 | 6.00 | 1.96  | =       | 20.4      | 0.0     |
| Candidate-071 | Candidates | Reuptake Inhibitors | 376.9 | 1.7   | 41.4  | -0.9  | 0   | 10.1 | 0.43 | 8.81 | 4.04  | =       | 13.2      | 0.0     |
| Candidate-072 | Candidates | Dopaminergic GPCR   | 360.4 | 3.1   | 41.5  | 4.1   | 0   | 7.8  | 0.46 | 4.41 | 6.71  | =       | 8.2       | 0.0     |
| Candidate-073 | Candidates | Gaba Receptors      | 323.3 | 2.2   | 84.1  | 4.1   | 2   | 1.0  | 0.50 | 4.41 | 4.48  | =       | 5.8       | 0.0     |
| Candidate-074 | Candidates | Peptide GPCR        | 327.5 | 7.6   | 31.4  | 6.2   | 0   | 5.6  | 0.52 | 2.67 | 14.60 |         |           |         |
| Candidate-075 | Candidates | Nicotinic Receptor  | 271.3 | 1.7   | 58.4  | -1.2  | 1   | 9.5  | 0.51 | 8.40 | 3.27  | =       | 18.3      | 4.5     |
| Candidate-076 | Candidates | Nicotinic Receptor  | 258.3 | 1.6   | 45.4  | 0.4   | 0   | 8.9  | 0.61 | 7.94 | 2.55  | =       | 22.7      | 1.0     |
| Candidate-077 | Candidates | Gaba Receptors      | 316.3 | 2.0   | 71.2  | 1.4   | 2   | 1.0  | 0.52 | 7.03 | 3.97  | =       | 21.2      | 8.6     |
| Candidate-078 | Candidates | Reuptake Inhibitors | 335.3 | 2.9   | 39.7  | 1.5   | 1   | 8.3  | 0.51 | 7.24 | 5.70  | =       | 15.8      | 3.7     |
| Candidate-079 | Candidates | Calcium Channels    | 187.3 | 0.2   | 63.3  | 0.0   | 3   | 10.5 | 0.82 | 7.61 | 0.26  |         |           |         |
| Candidate-080 | Candidates | Dopaminergic GPCR   | 367.4 | 3.0   | 65.3  | 3.4   | 0   | 7.2  | 0.46 | 5.46 | 6.48  | =       | 12.6      | 0.0     |
| Candidate-081 | Candidates | Serotonergic GPCR   | 382.5 | 2.8   | 39.7  | 2.3   | 0   | 7.2  | 0.43 | 6.40 | 6.50  | =       | 32.4      | 0.0     |
| Candidate-082 | Candidates | Gaba Receptors      | 297.4 | 1.2   | 74.0  | -1.9  | 3   | 9.6  | 0.49 | 9.66 | 2.52  | =       | 2.6       | 3.7     |
| Candidate-083 | Candidates | Cannabinoids        | 452.3 | 5.8   | 47.4  | 5.1   | 0   | 1.0  | 0.42 | 4.00 | 13.59 | =       | 7.1       | 0.0     |
| Candidate-084 | Candidates | Gaba Receptors      | 360.4 | 2.6   | 72.3  | 3.1   | 0   | 4.0  | 0.44 | 5.44 | 5.90  | =       | 31.2      | 8.0     |
| Candidate-085 | Candidates | Reuptake Inhibitors | 294.4 | 3.2   | 52.6  | 1.5   | 1   | 8.4  | 0.53 | 6.54 | 6.07  |         |           |         |
| Candidate-086 | Candidates | Muscarinic Receptor | 270.3 | 2.5   | 34.1  | 3.9   | 0   | 5.5  | 0.54 | 3.91 | 4.59  | =       | 23.0      | 0.0     |
| Candidate-087 | Candidates | Cannabinoids        | 496.4 | 4.3   | 101.4 | 2.2   | 3   | 5.7  | 0.40 | 7.48 | 10.70 | =       | 3.7       | 0.0     |
| Candidate-088 | Candidates | Dopaminergic GPCR   | 357.8 | 3.5   | 44.8  | 2.3   | 1   | 5.8  | 0.49 | 6.41 | 7.17  | =       | 16.7      | 0.0     |
| Candidate-089 | Candidates | Enzyme              | 271.4 | 2.2   | 60.2  | 0.3   | 3   | 9.4  | 0.53 | 7.22 | 4.23  | =       | 9.6       | 2.0     |
| Candidate-090 | Candidates | Glutamate receptors | 359.4 | 1.6   | 73.2  | 1.1   | 3   | 6.8  | 0.42 | 6.63 | 3.82  | =       | 18.2      | 0.0     |
| Candidate-091 | Candidates | Gaba Receptors      | 330.4 | 2.5   | 71.2  | 2.0   | 2   | 1.0  | 0.46 | 5.97 | 5.44  | =       | 19.9      | 6.6     |
| Candidate-092 | Candidates | Reuptake Inhibitors | 360.3 | 3.1   | 50.2  | 0.6   | 1   | 8.1  | 0.41 | 7.00 | 7.55  | =       | 11.9      | 0.0     |
| Candidate-093 | Candidates | Muscarinic Receptor | 269.2 | 5.2   | 15.6  | 2.3   | 0   | 7.3  | 0.56 | 4.51 | 9.38  | =       | 23.3      | 0.0     |
| Candidate-094 | Candidates | Dopaminergic GPCR   | 420.5 | 4.9   | 44.3  | 3.7   | 1   | 7.8  | 0.36 | 4.32 | 13.58 | =       | 6.8       | 5.4     |
| Candidate-095 | Candidates | Gaba Receptors      | 321.3 | 2.9   | 68.5  | 0.9   | 1   | 2.1  | 0.49 | 7.55 | 5.90  |         |           |         |
| Candidate-096 | Candidates | Serotonergic GPCR   | 419.6 | 4.1   | 47.0  | 2.3   | 1   | 7.8  | 0.41 | 6.86 | 9.88  | =       | 36.0      | 0.0     |
| Candidate-097 | Candidates | Reuptake Inhibitors | 309.8 | 4.9   | 30.5  | 3.1   | 1   | 8.6  | 0.57 | 5.47 | 8.53  | =       | 7.5       | 5.6     |
| Candidate-098 | Candidates | Enzyme              | 460.5 | 4.1   | 52.8  | 4.8   | 0   | 4.1  | 0.36 | 4.02 | 11.34 | =       | 1.7       | 0.0     |
| Candidate-099 | Candidates | Peptide GPCR        | 412.6 | 5.6   | 24.5  | 3.5   | 1   | 10.0 | 0.45 | 6.49 | 12.39 | =       | 5.7       | 2.5     |
| Candidate-100 | Candidates | Enzyme              | 400.3 | 8.6   | 49.3  | 5.4   | 2   | 1.0  | 0.30 | 0.42 | 28.68 |         |           |         |
| Candidate-101 | Candidates | Dopaminergic GPCR   | 434.6 | 5.2   | 48.5  | 3.7   | 1   | 8.4  | 0.40 | 5.11 | 13.06 |         |           |         |
| Candidate-102 | Candidates | Serotonergic GPCR   | 450.6 | 4.1   | 69.9  | 3.7   | 0   | 8.0  | 0.39 | 5.60 | 10.29 | =       | 15.1      | 10.4    |
| Candidate-103 | Candidates | Dopaminergic GPCR   | 329.5 | 6.4   | 3.2   | 5.0   | 0   | 8.4  | 0.48 | 3.65 | 13.31 |         |           |         |

| Pub-Name      | Set        | Target Mechanism   | MW    | CLOGP | TPSA  | CLOGD | HBD | PKA  | LE   | LLE  | LELP  | Papp Op | Papp Mean | Papp SD |
|---------------|------------|--------------------|-------|-------|-------|-------|-----|------|------|------|-------|---------|-----------|---------|
| Candidate-104 | Candidates | Peptide GPCR       | 419.6 | 3.2   | 53.6  | 1.2   | 2   | 9.9  | 0.46 | 9.05 | 7.03  | =       | 10.7      | 6.8     |
| Candidate-105 | Candidates | Gaba Receptors     | 298.3 | 2.4   | 71.2  | 1.5   | 2   | 1.3  | 0.52 | 6.66 | 4.58  | =       | 12.7      | 5.6     |
| Candidate-106 | Candidates | Peptide GPCR       | 493.6 | 5.8   | 103.5 | 4.6   | 4   | 1.0  |      |      |       | =       | 16.8      | 0.0     |
| Candidate-107 | Candidates | Calcium Channels   | 173.3 | -0.3  | 63.3  | -0.5  | 3   | 10.5 | 0.88 | 8.07 | -0.36 |         |           |         |
| Candidate-108 | Candidates | Nicotinic Receptor | 209.2 | 2.5   | 12.0  | 0.2   | 1   | 10.1 | 0.88 | 9.17 | 2.90  | =       | 28.9      | 1.1     |

| Pub-Name           | Set   | Target Mechanism    | Papp CV | Papp SEM | Papp Up95 | Papp Low95 | Papp N | Pgp OP | Pgp Mean | Pgp SD | Pgp CV | Pgp SEM | Pgp Up95 |
|--------------------|-------|---------------------|---------|----------|-----------|------------|--------|--------|----------|--------|--------|---------|----------|
| Acamprosate        | Drugs | Glutamate receptors |         |          |           |            | 0      |        |          |        |        |         |          |
| Alprazolam         | Drugs | Gaba Receptors      |         |          |           |            |        | =      | 1.4      | 0.0    | 0.0    | 0.0     | 1.4      |
| Amfebutamone       | Drugs | Dopaminergic GPCR   | 11.5    | 2.1      | 41.2      | 23.0       | 3      | =      | 1.2      | 0.3    | 23.3   | 0.1     | 1.6      |
| Amisulpride        | Drugs | Dopaminergic GPCR   | 0.0     | 0.0      | 1.1       | 1.1        | 1      | >      | 9.2      | 9.4    | 102.3  | 5.4     | 32.6     |
| Amphetamine        | Drugs | Reuptake Inhibitors |         |          |           |            |        |        |          |        |        |         |          |
| Aniracetam         | Drugs |                     |         |          |           |            |        | =      | 1.1      | 0.0    | 0.0    | 0.0     | 1.1      |
| Apomorphine        | Drugs | Dopaminergic GPCR   | 0.0     | 0.0      | 2.7       | 2.7        | 1      | =      | 6.9      | 8.6    | 123.7  | 6.1     | 83.8     |
| Aprepitant         | Drugs |                     | 73.2    | 2.3      | 33.2      | -24.4      | 2      | >      | 5.5      | 1.8    | 33.4   | 0.7     | 7.4      |
| Aripiprazole       | Drugs | Dopaminergic GPCR   |         |          |           |            | 0      |        |          |        |        |         |          |
| Atomoxetine        | Drugs | Reuptake Inhibitors | 58.7    | 6.9      | 104.6     | -71.2      | 2      | =      | 2.5      | 0.9    | 33.8   | 0.5     | 4.7      |
| Bromazepam         | Drugs | Gaba Receptors      | 0.0     | 0.0      | 27.5      | 27.5       | 1      | =      | 1.2      | 0.0    | 0.0    | 0.0     | 1.2      |
| Bromocriptine      | Drugs | Dopaminergic GPCR   | 64.0    | 1.8      | 11.1      | -0.1       | 4      | =      | 5.8      | 0.0    | 0.0    | 0.0     | 5.8      |
| Brotizolam         | Drugs | Gaba Receptors      | 0.0     | 0.0      | 30.8      | 30.8       | 1      | =      | 1.3      | 0.2    | 15.0   | 0.1     | 1.8      |
| Budipine           | Drugs | Calcium Channels    |         |          |           |            |        |        |          |        |        |         |          |
| Buprenorphine      | Drugs | Opioid Receptor     |         |          |           |            |        |        |          |        |        |         |          |
| Buspirone          | Drugs | Serotonergic GPCR   | 15.3    | 2.7      | 41.4      | 18.6       | 3      | =      | 1.3      | 0.2    | 16.0   | 0.1     | 1.5      |
| Cabergoline        | Drugs | Dopaminergic GPCR   | 5.3     | 0.1      | 2.0       | 0.7        | 2      | =      | 14.3     | 5.9    | 41.3   | 2.9     | 23.7     |
| Caffeine           | Drugs | Serotonergic GPCR   | 0.0     | 0.0      | 37.4      | 37.4       | 1      |        |          |        |        |         |          |
| Carbamazepine      | Drugs | Reuptake Inhibitors | 6.1     | 1.6      | 55.8      | 16.4       | 2      | =      | 1.0      | 0.1    | 13.9   | 0.1     | 1.2      |
| Carisoprodol       | Drugs |                     |         |          |           |            |        | =      | 1.2      | 0.0    | 0.0    | 0.0     | 1.2      |
| Chlorpromazine     | Drugs | Dopaminergic GPCR   |         |          |           |            |        | =      | 5.7      | 0.0    | 0.0    | 0.0     | 5.7      |
| Citalopram         | Drugs | Serotonergic GPCR   | 25.6    | 2.7      | 50.0      | -19.7      | 2      | =      | 1.9      | 0.4    | 20.4   | 0.2     | 2.5      |
| Clomipramine       | Drugs | Serotonergic GPCR   | 36.1    | 0.5      | 8.1       | -4.3       | 2      | >      | 10.9     | 7.9    | 72.4   | 4.0     | 23.6     |
| Clonazepam         | Drugs | Gaba Receptors      | 0.0     | 0.0      | 31.1      | 31.1       | 1      | =      | 1.3      | 0.0    | 0.0    | 0.0     | 1.3      |
| Clozapine          | Drugs | Serotonergic GPCR   | 41.9    | 1.7      | 14.0      | -0.3       | 3      | =      | 2.5      | 0.9    | 36.3   | 0.3     | 3.3      |
| Cyclobenzaprine    | Drugs |                     |         |          |           |            |        | =      | 2.8      | 0.0    | 0.0    | 0.0     | 2.8      |
| Dexmethylphenidate | Drugs | Dopaminergic GPCR   |         |          |           |            |        |        |          |        |        |         |          |
| Dextropropoxyphene | Drugs | Opioid Receptor     |         |          |           |            |        |        |          |        |        |         |          |
| Diazepam           | Drugs | Gaba Receptors      |         |          |           |            |        |        |          |        |        |         |          |
| Donepezil          | Drugs | Enzyme              | 37.6    | 5.8      | 95.7      | -51.9      | 2      | =      | 1.6      | 0.4    | 21.5   | 0.2     | 2.5      |
| Dronabinol         | Drugs | Cannabinoids        |         |          |           |            |        |        |          |        |        |         |          |
| Duloxetine         | Drugs | Serotonergic GPCR   |         |          |           |            | 0      | =      | 1.8      | 2.0    | 114.0  | 1.4     | 20.0     |
| Eletriptan         | Drugs | Serotonergic GPCR   | 44.6    | 2.9      | 45.4      | -27.3      | 2      | =      | 22.6     | 6.6    | 29.3   | 1.6     | 25.9     |
| Escitalopram       | Drugs | Serotonergic GPCR   | 4.8     | 0.4      | 18.0      | 14.2       | 3      | =      | 2.0      | 0.4    | 20.9   | 0.2     | 2.6      |
| Eszopiclone        | Drugs | Gaba Receptors      |         |          |           |            |        |        |          |        |        |         |          |
| Ethosuximide       | Drugs | Calcium Channels    |         |          |           |            |        |        |          |        |        |         |          |
| Felbamate          | Drugs | Gaba Receptors      |         |          |           |            | 0      |        |          |        |        |         |          |



| Pub-Name             | Set   | Target Mechanism    | Papp CV | Papp SEM | Papp Up95 | Papp Low95 | Papp N | Pgp OP | Pgp Mean | Pgp SD | Pgp CV | Pgp SEM | Pgp Up95 |
|----------------------|-------|---------------------|---------|----------|-----------|------------|--------|--------|----------|--------|--------|---------|----------|
| Fentanyl             | Drugs | Opioid Receptor     |         |          |           |            |        |        |          |        |        |         |          |
| Flumazenil           | Drugs | Gaba Receptors      | 13.9    | 2.5      | 41.4      | 20.1       | 3      | =      | 1.1      | 0.1    | 13.7   | 0.1     | 1.4      |
| Fluoxetine           | Drugs | Serotonergic GPCR   | 63.3    | 0.9      | 14.2      | -9.9       | 2      | =      | 5.2      | 4.9    | 94.1   | 2.5     | 13.1     |
| Fluvoxamine          | Drugs | Serotonergic GPCR   | 48.1    | 2.1      | 16.5      | -1.5       | 3      | =      | 3.1      | 2.1    | 66.8   | 0.9     | 5.8      |
| Gabapentin           | Drugs | Calcium Channels    |         |          |           |            | 0      |        |          |        |        |         |          |
| Galantamine          | Drugs | Enzyme              | 0.0     | 0.0      | 15.6      | 15.6       | 1      | =      | 1.0      | 0.1    | 12.4   | 0.1     | 1.3      |
| Haloperidol          | Drugs | Dopaminergic GPCR   |         |          |           |            | 0      |        |          |        |        |         |          |
| Hydrocodone          | Drugs | Opioid Receptor     | 0.0     | 0.0      | 29.5      | 29.5       | 1      | =      | 1.3      | 0.0    | 0.0    | 0.0     | 1.3      |
| Indeloxazine         | Drugs | Reuptake Inhibitors | 0.0     | 0.0      | 25.2      | 25.2       | 1      | =      | 1.4      | 0.0    | 0.0    | 0.0     | 1.4      |
| Lamotrigine          | Drugs | Reuptake Inhibitors | 16.2    | 2.0      | 31.1      | 18.3       | 4      | =      | 1.1      | 0.1    | 6.5    | 0.0     | 1.2      |
| Levetiracetam        | Drugs | Calcium Channels    |         |          |           |            | 0      | =      | 1.3      | 0.0    | 0.0    | 0.0     | 1.3      |
| Levomethadyl Acetate | Drugs | Opioid Receptor     |         |          |           |            |        |        |          |        |        |         |          |
| Lofexidine           | Drugs |                     |         |          |           |            |        | =      | 1.2      | 0.0    | 3.4    | 0.0     | 1.6      |
| Lorazepam            | Drugs | Gaba Receptors      | 9.8     | 1.7      | 46.4      | 3.0        | 2      | =      | 1.2      | 0.0    | 1.6    | 0.0     | 1.3      |
| Meprobamate          | Drugs |                     |         |          |           |            |        |        |          |        |        |         |          |
| Methylphenidate      | Drugs | Dopaminergic GPCR   | 0.0     | 0.0      | 28.3      | 28.3       | 1      | =      | 1.1      | 0.0    | 0.0    | 0.0     | 1.1      |
| Metoclopramide       | Drugs |                     |         |          |           |            |        |        |          |        |        |         |          |
| Midazolam            | Drugs | Gaba Receptors      |         |          |           |            |        |        |          |        |        |         |          |
| Milnacipran          | Drugs | Serotonergic GPCR   |         |          |           |            |        |        |          |        |        |         |          |
| Minaprine            | Drugs | Enzyme              | 0.0     | 0.0      | 36.6      | 36.6       | 1      | =      | 1.2      | 0.2    | 14.4   | 0.1     | 1.7      |
| Mirtazapine          | Drugs |                     | 27.0    | 4.9      | 88.5      | -36.8      | 2      | =      | 1.2      | 0.1    | 8.8    | 0.0     | 1.4      |
| Moclobemide          | Drugs | Enzyme              | 39.5    | 9.8      | 159.7     | -89.4      | 2      | =      | 1.1      | 0.0    | 3.1    | 0.0     | 1.2      |
| Modafinil            | Drugs | Dopaminergic GPCR   |         |          |           |            | 0      |        |          |        |        |         |          |
| Morphine             | Drugs | Opioid Receptor     |         |          |           |            |        |        |          |        |        |         |          |
| Nalmefene            | Drugs | Opioid Receptor     |         |          |           |            |        | =      | 1.1      | 0.0    | 4.0    | 0.0     | 1.3      |
| Naltrexone           | Drugs | Opioid Receptor     | 18.0    | 2.6      | 53.5      | -12.7      | 2      | =      | 1.1      | 0.1    | 7.5    | 0.0     | 1.3      |
| Nemonapride          | Drugs | Dopaminergic GPCR   | 0.0     | 0.0      | 20.6      | 20.6       | 1      | =      | 1.6      | 0.1    | 7.8    | 0.1     | 1.9      |
| Nicergoline          | Drugs |                     |         |          |           |            |        |        |          |        |        |         |          |
| Nicotrol             | Drugs | Nicotinic Receptor  | 15.0    | 3.0      | 66.0      | -9.8       | 2      | =      | 1.3      | 0.4    | 28.7   | 0.3     | 4.8      |
| Nimodipine           | Drugs | Calcium Channels    | 0.0     | 0.0      | 15.4      | 15.4       | 1      | =      | 1.5      | 0.2    | 10.6   | 0.1     | 1.7      |
| Nortriptyline        | Drugs |                     |         |          |           |            |        |        |          |        |        |         |          |
| Olanzapine           | Drugs | Dopaminergic GPCR   | 62.7    | 6.8      | 48.2      | -10.5      | 3      | =      | 2.0      | 0.6    | 28.3   | 0.2     | 2.5      |
| Oxcarbazepine        | Drugs | Reuptake Inhibitors |         |          |           |            |        | =      | 1.4      | 0.4    | 30.7   | 0.2     | 2.4      |
| Oxycodone            | Drugs | Opioid Receptor     | 0.0     | 0.0      | 28.3      | 28.3       | 1      | =      | 1.1      | 0.0    | 0.0    | 0.0     | 1.1      |
| Paliperidone         | Drugs | Dopaminergic GPCR   | 0.0     | 0.0      | 21.5      | 21.5       | 1      | =      | 4.1      | 0.8    | 18.5   | 0.4     | 5.9      |
| Paroxetine           | Drugs | Serotonergic GPCR   | 17.0    | 0.1      | 2.4       | -0.5       | 2      | =      | 5.5      | 3.8    | 69.1   | 1.9     | 11.6     |
| Pergolide            | Drugs | Dopaminergic GPCR   | 65.0    | 4.4      | 66.0      | -46.7      | 2      | =      | 1.6      | 0.2    | 13.7   | 0.1     | 2.1      |

| Pub-Name      | Set   | Target Mechanism    | Papp CV | Papp SEM | Papp Up95 | Papp Low95 | Papp N | Pgp OP | Pgp Mean | Pgp SD | Pgp CV | Pgp SEM | Pgp Up95 |
|---------------|-------|---------------------|---------|----------|-----------|------------|--------|--------|----------|--------|--------|---------|----------|
| Perospirone   | Drugs | Dopaminergic GPCR   |         |          |           |            |        | =      | 7.8      | 2.0    | 26.2   | 1.2     | 12.9     |
| phenytoin     | Drugs | Reuptake Inhibitors | 9.2     | 1.9      | 52.1      | 5.1        | 2      | =      | 1.1      | 0.2    | 17.8   | 0.1     | 1.4      |
| Piracetam     | Drugs |                     |         |          |           |            | 0      |        |          |        |        |         |          |
| Pramipexole   | Drugs | Dopaminergic GPCR   | 0.0     | 0.0      | 12.8      | 12.8       | 1      | =      | 1.0      | 0.4    | 38.3   | 0.3     | 4.5      |
| Pregabalin    | Drugs | Calcium Channels    |         |          |           |            | 0      |        |          |        |        |         |          |
| Propofol      | Drugs |                     |         |          |           |            | 0      |        |          |        |        |         |          |
| Propoxyphene  | Drugs |                     |         |          |           |            | 0      |        |          |        |        |         |          |
| Quazepam      | Drugs | Gaba Receptors      |         |          |           |            |        |        |          |        |        |         |          |
| Quetiapine    | Drugs | Serotonergic GPCR   | 6.6     | 1.0      | 34.7      | 8.9        | 2      | =      | 1.8      | 0.7    | 37.2   | 0.3     | 2.9      |
| Ramelteon     | Drugs | Melatonin Receptor  | 5.8     | 1.4      | 50.7      | 16.1       | 2      | =      | 1.0      | 0.1    | 8.3    | 0.0     | 1.2      |
| Rasagiline    | Drugs | Enzyme              |         |          |           |            |        | =      | 1.0      | 0.0    | 0.0    | 0.0     | 1.0      |
| Reboxetine    | Drugs | Reuptake Inhibitors | 0.0     | 0.0      | 12.2      | 12.2       | 1      | =      | 1.4      | 0.4    | 29.1   | 0.2     | 2.5      |
| Remifentanyl  | Drugs | Opioid Receptor     |         |          |           |            |        |        |          |        |        |         |          |
| Riluzole      | Drugs | Reuptake Inhibitors | 17.6    | 3.8      | 78.4      | -17.7      | 2      | =      | 1.5      | 0.5    | 31.1   | 0.3     | 2.6      |
| Rimonabant    | Drugs | Cannabinoids        | 52.1    | 1.3      | 20.1      | -13.0      | 2      | >      | 2.5      | 1.5    | 58.9   | 0.7     | 4.8      |
| Risperidone   | Drugs | Dopaminergic GPCR   | 47.1    | 6.3      | 50.3      | -3.9       | 3      | =      | 2.6      | 0.4    | 15.8   | 0.1     | 3.0      |
| Rivastigmine  | Drugs | Enzyme              | 17.5    | 3.4      | 70.4      | -15.7      | 2      | =      | 1.0      | 0.1    | 12.7   | 0.1     | 1.2      |
| Ropinirole    | Drugs | Dopaminergic GPCR   | 25.9    | 4.9      | 89.4      | -35.7      | 2      | =      | 1.3      | 0.3    | 21.9   | 0.1     | 1.6      |
| Ropivacaine   | Drugs |                     | 0.0     | 0.0      | 43.4      | 43.4       | 1      | =      | 1.0      | 0.1    | 9.9    | 0.0     | 1.2      |
| Selegiline    | Drugs | Enzyme              | 0.0     | 0.0      | 25.9      | 25.9       | 1      |        |          |        |        |         |          |
| Sertindole    | Drugs | Serotonergic GPCR   | 14.4    | 0.0      | 0.3       | 0.0        | 2      | =      | 10.4     | 5.8    | 55.9   | 4.1     | 62.8     |
| Sertraline    | Drugs | Serotonergic GPCR   | 0.0     | 0.0      | 2.2       | 2.2        | 1      | =      | 11.2     | 0.0    | 0.0    | 0.0     | 11.2     |
| Sinequan      | Drugs | Serotonergic GPCR   | 0.0     | 0.0      | 10.4      | 10.4       | 1      | =      | 2.0      | 0.4    | 20.7   | 0.3     | 5.6      |
| Sulpiride     | Drugs | Dopaminergic GPCR   | 0.0     | 0.0      | 0.3       | 0.3        | 1      |        |          |        |        |         |          |
| Tacrine       | Drugs | Enzyme              | 24.9    | 5.3      | 97.4      | -37.3      | 2      | =      | 1.3      | 0.6    | 46.1   | 0.3     | 2.0      |
| Talipexole    | Drugs | Dopaminergic GPCR   | 29.3    | 4.7      | 83.0      | -37.2      | 2      | =      | 1.2      | 0.2    | 20.6   | 0.1     | 1.7      |
| Terguride     | Drugs | Dopaminergic GPCR   |         |          |           |            |        |        |          |        |        |         |          |
| Thiopental    | Drugs | Gaba Receptors      |         |          |           |            |        |        |          |        |        |         |          |
| Tiagabine     | Drugs | Gaba Receptors      | 9.3     | 1.4      | 37.9      | 3.5        | 2      | =      | 1.5      | 0.2    | 10.3   | 0.1     | 1.9      |
| Tianeptine    | Drugs | Reuptake Inhibitors | 22.9    | 3.7      | 69.4      | -24.0      | 2      | =      | 1.5      | 0.1    | 9.8    | 0.1     | 1.8      |
| Topiramate    | Drugs | Enzyme              |         |          |           |            | 0      | =      | 1.1      | 0.1    | 8.5    | 0.1     | 1.4      |
| Tramadol      | Drugs | Reuptake Inhibitors |         |          |           |            |        |        |          |        |        |         |          |
| Trazodone     | Drugs | Serotonergic GPCR   |         |          |           |            |        | =      | 1.2      | 0.2    | 12.9   | 0.1     | 1.6      |
| Tropisetron   | Drugs | Serotonergic GPCR   |         |          |           |            |        |        |          |        |        |         |          |
| Valproic Acid | Drugs |                     |         |          |           |            | 0      |        |          |        |        |         |          |
| Varenicline   | Drugs | Nicotinic Receptor  | 0.0     | 0.0      | 24.6      | 24.6       | 1      | =      | 1.2      | 0.2    | 21.0   | 0.1     | 1.3      |
| Venlafaxine   | Drugs | Serotonergic GPCR   | 29.5    | 3.5      | 35.9      | 5.6        | 3      | =      | 1.3      | 0.2    | 14.6   | 0.1     | 1.6      |

| Pub-Name      | Set        | Target Mechanism    | Papp CV | Papp SEM | Papp Upp95 | Papp Low95 | Papp N | Pgp OP | Pgp Mean | Pgp SD | Pgp CV | Pgp SEM | Pgp Upp95 |
|---------------|------------|---------------------|---------|----------|------------|------------|--------|--------|----------|--------|--------|---------|-----------|
| Verapamil     | Drugs      | Calcium Channels    |         |          |            |            |        | =      | 2.3      | 1.2    | 52.8   | 0.9     | 13.5      |
| Vigabatrin    | Drugs      | Gaba Receptors      |         |          |            |            |        |        |          |        |        |         |           |
| Vinpocetine   | Drugs      |                     | 33.3    | 0.9      | 8.7        | 0.8        | 3      | =      | 2.1      | 0.9    | 41.1   | 0.4     | 3.5       |
| Zaleplon      | Drugs      | Gaba Receptors      | 0.0     | 0.0      | 37.1       | 37.1       | 1      | =      | 1.4      | 0.0    | 0.0    | 0.0     | 1.4       |
| Ziprasidone   | Drugs      | Dopaminergic GPCR   | 0.0     | 0.0      | 10.3       | 10.3       | 1      | =      | 2.3      | 0.9    | 40.1   | 0.5     | 4.7       |
| Zolpidem      | Drugs      | Gaba Receptors      | 0.0     | 0.0      | 80.3       | 80.3       | 1      | =      | 1.2      | 0.0    | 0.0    | 0.0     | 1.2       |
| Zonisamide    | Drugs      | Enzyme              | 0.0     | 0.0      | 29.1       | 29.1       | 1      | =      | 1.0      | 0.0    | 4.7    | 0.0     | 1.1       |
| Zotepine      | Drugs      | Serotonergic GPCR   |         |          |            |            | 0      | =      | 5.1      | 0.0    | 0.0    | 0.0     | 5.1       |
| Candidate-001 | Candidates | Glutamate receptors |         |          |            |            | 0      |        |          |        |        |         |           |
| Candidate-002 | Candidates | Reuptake Inhibitors | 72.1    | 2.8      | 16.8       | -1.2       | 4      | =      | 2.6      | 1.0    | 38.1   | 0.5     | 4.2       |
| Candidate-003 | Candidates | Reuptake Inhibitors | 72.0    | 5.8      | 85.1       | -62.3      | 2      | =      | 6.2      | 2.2    | 35.8   | 1.6     | 25.9      |
| Candidate-004 | Candidates | Serotonergic GPCR   |         |          |            |            |        |        |          |        |        |         |           |
| Candidate-005 | Candidates | Enzyme              |         |          |            |            | 0      |        |          |        |        |         |           |
| Candidate-006 | Candidates | Peptide GPCR        | 16.8    | 1.0      | 21.1       | -4.3       | 2      |        |          |        |        |         |           |
| Candidate-007 | Candidates | Enzyme              | 0.0     | 0.0      | 1.0        | 1.0        | 1      | >      | 6.3      | 1.9    | 29.8   | 0.8     | 8.7       |
| Candidate-008 | Candidates | Calcium Channels    |         |          |            |            |        |        |          |        |        |         |           |
| Candidate-009 | Candidates | Nicotinic Receptor  |         |          |            |            | 0      |        |          |        |        |         |           |
| Candidate-010 | Candidates | Opioid Receptor     | 1.6     | 0.2      | 21.1       | 15.8       | 2      | =      | 1.9      | 0.0    | 1.0    | 0.0     | 2.0       |
| Candidate-011 | Candidates | Dopaminergic GPCR   |         |          |            |            |        | =      | 2.3      | 0.0    | 0.9    | 0.0     | 2.5       |
| Candidate-012 | Candidates | Peptide GPCR        | 35.7    | 1.3      | 20.8       | -10.9      | 2      | =      | 2.9      | 0.9    | 29.6   | 0.5     | 5.1       |
| Candidate-013 | Candidates | Enzyme              | 0.0     | 0.0      | 11.4       | 11.4       | 1      | =      | 5.6      | 7.3    | 130.0  | 2.1     | 10.0      |
| Candidate-014 | Candidates | Opioid Receptor     | 0.0     | 0.0      | 19.9       | 19.9       | 1      | =      | 1.4      | 0.1    | 7.0    | 0.1     | 1.7       |
| Candidate-015 | Candidates | Nicotinic Receptor  |         |          |            |            |        | =      | 1.2      | 0.1    | 10.8   | 0.1     | 1.5       |
| Candidate-016 | Candidates | Gaba Receptors      | 9.2     | 1.4      | 36.2       | 26.9       | 4      | =      | 1.4      | 0.2    | 11.5   | 0.1     | 1.6       |
| Candidate-017 | Candidates | Enzyme              | 67.6    | 8.1      | 55.3       | -14.0      | 3      | =      | 3.1      | 0.0    | 0.0    | 0.0     | 3.1       |
| Candidate-018 | Candidates | Cannabinoids        | 30.5    | 1.1      | 10.8       | 1.5        | 3      | =      | 2.3      | 0.3    | 12.2   | 0.1     | 2.7       |
| Candidate-019 | Candidates | Peptide GPCR        | 0.0     | 0.0      | 7.8        | 7.8        | 1      | =      | 2.2      | 0.7    | 33.1   | 0.5     | 8.7       |
| Candidate-020 | Candidates | Glutamate receptors | 0.0     | 0.0      | 14.9       | 14.9       | 1      | =      | 3.0      | 0.0    | 0.0    | 0.0     | 3.0       |
| Candidate-021 | Candidates | Enzyme              | 95.0    | 2.9      | 18.0       | -7.3       | 3      | >      | 6.4      | 3.0    | 47.3   | 0.9     | 8.2       |
| Candidate-022 | Candidates | Enzyme              | 154.1   | 0.4      | 1.8        | -0.8       | 4      | =      | 13.8     | 1.9    | 14.1   | 1.1     | 18.6      |
| Candidate-023 | Candidates | Nicotinic Receptor  | 99.2    | 9.0      | 126.8      | -101.2     | 2      | =      | 1.2      | 0.2    | 16.6   | 0.1     | 1.5       |
| Candidate-024 | Candidates | Calcium Channels    |         |          |            |            |        |        |          |        |        |         |           |
| Candidate-025 | Candidates | Reuptake Inhibitors |         |          |            |            |        | >      | 5.3      | 0.7    | 13.8   | 0.4     | 7.2       |
| Candidate-026 | Candidates | Serotonergic GPCR   | 30.0    | 0.7      | 12.2       | -5.6       | 2      | =      | 3.9      | 1.8    | 44.9   | 0.9     | 6.8       |
| Candidate-027 | Candidates | Serotonergic GPCR   | 132.7   | 2.7      | 12.8       | -4.6       | 4      | =      | 16.0     | 0.0    | 0.0    | 0.0     | 16.0      |
| Candidate-028 | Candidates | Histaminergic GPCR  | 0.0     | 0.0      | 51.5       | 51.5       | 1      | =      | 1.2      | 0.1    | 7.2    | 0.0     | 1.3       |
| Candidate-029 | Candidates | Glutamate receptors | 0.0     | 0.0      | 26.5       | 26.5       | 1      | =      | 1.3      | 0.1    | 10.4   | 0.1     | 2.5       |

| Pub-Name      | Set        | Target Mechanism    | Papp CV | Papp SEM | Papp Upp95 | Papp Low95 | Papp N | Pgp OP | Pgp Mean | Pgp SD | Pgp CV | Pgp SEM | Pgp Upp95 |
|---------------|------------|---------------------|---------|----------|------------|------------|--------|--------|----------|--------|--------|---------|-----------|
| Candidate-030 | Candidates | Peptide GPCR        | 20.5    | 1.6      | 20.3       | 10.3       | 4      | =      | 1.8      | 0.4    | 20.8   | 0.2     | 2.8       |
| Candidate-031 | Candidates | Serotonergic GPCR   | 24.7    | 4.7      | 52.9       | 12.7       | 3      | =      | 1.1      | 0.1    | 7.2    | 0.0     | 1.2       |
| Candidate-032 | Candidates | Gaba Receptors      | 20.5    | 2.7      | 34.5       | 17.4       | 4      | =      | 1.3      | 0.2    | 11.9   | 0.1     | 1.5       |
| Candidate-033 | Candidates | Opioid Receptor     | 7.1     | 0.8      | 25.7       | 5.7        | 2      | =      | 2.8      | 0.8    | 29.6   | 0.2     | 3.3       |
| Candidate-034 | Candidates | Reuptake Inhibitors | 93.6    | 2.7      | 37.8       | -29.7      | 2      | =      | 3.5      | 0.5    | 14.4   | 0.3     | 4.3       |
| Candidate-035 | Candidates | Calcium Channels    |         |          |            |            | 0      |        |          |        |        |         |           |
| Candidate-036 | Candidates | Peptide GPCR        |         |          |            |            | 0      |        |          |        |        |         |           |
| Candidate-037 | Candidates | Gaba Receptors      |         |          |            |            | 0      | =      | 0.8      | 0.2    | 22.6   | 0.1     | 1.0       |
| Candidate-038 | Candidates | Serotonergic GPCR   |         |          |            |            | 0      |        |          |        |        |         |           |
| Candidate-039 | Candidates | Glutamate receptors | 0.0     | 0.0      | 3.3        | 3.3        | 1      | >      | 5.5      | 1.4    | 25.5   | 0.5     | 6.6       |
| Candidate-040 | Candidates | Enzyme              | 0.0     | 0.0      | 38.4       | 38.4       | 1      | =      | 1.3      | 0.0    | 0.0    | 0.0     | 1.3       |
| Candidate-041 | Candidates | Peptide GPCR        | 47.5    | 2.8      | 44.1       | -27.4      | 2      | >      | 6.6      | 8.1    | 121.3  | 1.6     | 10.1      |
| Candidate-042 | Candidates | Serotonergic GPCR   |         |          |            |            |        | =      | 1.8      | 0.2    | 12.8   | 0.1     | 2.4       |
| Candidate-043 | Candidates | Peptide GPCR        |         |          |            |            |        | =      | 2.4      | 0.2    | 6.4    | 0.1     | 2.8       |
| Candidate-044 | Candidates | Serotonergic GPCR   | 35.8    | 0.5      | 4.5        | 1.2        | 4      | =      | 5.7      | 2.6    | 45.7   | 0.8     | 5.7       |
| Candidate-045 | Candidates | Cannabinoids        | 59.5    | 2.5      | 16.2       | 2.4        | 5      | =      | 6.0      | 0.0    | 0.0    | 0.0     | 6.0       |
| Candidate-046 | Candidates | Serotonergic GPCR   | 0.0     | 0.0      | 3.9        | 3.9        | 1      | >      | 9.7      | 18.2   | 187.0  | 6.1     | 23.7      |
| Candidate-047 | Candidates | Calcium Channels    |         |          |            |            |        |        |          |        |        |         |           |
| Candidate-048 | Candidates | Dopaminergic GPCR   |         |          |            |            |        | >      | 3.8      | 1.1    | 30.0   | 0.5     | 4.9       |
| Candidate-049 | Candidates | Serotonergic GPCR   | 7.1     | 0.3      | 9.8        | 2.2        | 2      | =      | 3.5      | 0.7    | 19.8   | 0.2     | 4.1       |
| Candidate-050 | Candidates | Gaba Receptors      | 8.6     | 0.1      | 1.9        | 1.5        | 5      | =      | 26.7     | 10.9   | 40.9   | 6.3     | 53.7      |
| Candidate-051 | Candidates | Reuptake Inhibitors | 68.7    | 1.2      | 17.8       | -12.8      | 2      | =      | 4.3      | 0.9    | 21.4   | 0.5     | 6.6       |
| Candidate-052 | Candidates | Enzyme              |         |          |            |            | 0      |        |          |        |        |         |           |
| Candidate-053 | Candidates | Nicotinic Receptor  | 5.5     | 1.2      | 46.2       | 15.8       | 2      | =      | 1.2      | 0.1    | 10.2   | 0.0     | 1.3       |
| Candidate-054 | Candidates | Opioid Receptor     |         |          |            |            | 0      |        |          |        |        |         |           |
| Candidate-055 | Candidates | Enzyme              | 91.7    | 4.8      | 68.9       | -54.0      | 2      | =      | 2.7      | 0.9    | 35.5   | 0.5     | 5.0       |
| Candidate-056 | Candidates | Enzyme              | 26.5    | 1.2      | 12.9       | 2.7        | 3      | =      | 1.9      | 0.4    | 19.0   | 0.1     | 2.3       |
| Candidate-057 | Candidates | Dopaminergic GPCR   | 0.0     | 0.0      | 4.9        | 4.9        | 1      |        |          |        |        |         |           |
| Candidate-058 | Candidates | Peptide GPCR        | 0.0     | 0.0      | 0.5        | 0.5        | 1      | >      | 1.2      | 0.0    | 0.0    | 0.0     | 1.2       |
| Candidate-059 | Candidates | Dopaminergic GPCR   |         |          |            |            |        |        |          |        |        |         |           |
| Candidate-060 | Candidates | Serotonergic GPCR   | 0.0     | 0.0      | 3.4        | 3.4        | 1      |        |          |        |        |         |           |
| Candidate-061 | Candidates | Histaminergic GPCR  | 18.7    | 4.0      | 55.5       | 29.9       | 4      | =      | 1.2      | 0.1    | 9.5    | 0.1     | 1.4       |
| Candidate-062 | Candidates | Dopaminergic GPCR   |         |          |            |            |        | =      | 2.7      | 0.0    | 0.0    | 0.0     | 2.7       |
| Candidate-063 | Candidates | Nicotinic Receptor  | 25.4    | 0.6      | 6.2        | 1.4        | 3      | =      | 3.5      | 1.0    | 27.3   | 0.6     | 5.9       |
| Candidate-064 | Candidates | Serotonergic GPCR   | 0.0     | 0.0      | 9.5        | 9.5        | 1      | =      | 1.9      | 0.6    | 34.4   | 0.4     | 3.5       |
| Candidate-065 | Candidates | Peptide GPCR        | 0.0     | 0.0      | 14.9       | 14.9       | 1      | =      | 1.8      | 0.4    | 19.6   | 0.2     | 2.7       |
| Candidate-066 | Candidates | Serotonergic GPCR   | 14.7    | 1.4      | 23.1       | 14.3       | 4      | =      | 2.4      | 0.8    | 31.4   | 0.4     | 4.3       |

| Pub-Name      | Set        | Target Mechanism    | Papp CV | Papp SEM | Papp Up95 | Papp Low95 | Papp N | Pgp OP | Pgp Mean | Pgp SD | Pgp CV | Pgp SEM | Pgp Up95 |
|---------------|------------|---------------------|---------|----------|-----------|------------|--------|--------|----------|--------|--------|---------|----------|
| Candidate-067 | Candidates | Dopaminergic GPCR   |         |          |           |            |        |        |          |        |        |         |          |
| Candidate-068 | Candidates | Serotonergic GPCR   | 0.0     | 0.0      | 2.8       | 2.8        | 1      | <      | 1.0      | 0.0    | 0.0    | 0.0     | 1.0      |
| Candidate-069 | Candidates | Reuptake Inhibitors | 0.0     | 0.0      | 9.3       | 9.3        | 1      | =      | 4.3      | 0.3    | 7.4    | 0.2     | 5.1      |
| Candidate-070 | Candidates | Dopaminergic GPCR   | 0.0     | 0.0      | 20.4      | 20.4       | 1      | =      | 0.9      | 0.1    | 8.8    | 0.1     | 1.5      |
| Candidate-071 | Candidates | Reuptake Inhibitors | 0.0     | 0.0      | 13.2      | 13.2       | 1      | =      | 4.1      | 1.1    | 27.1   | 0.6     | 5.9      |
| Candidate-072 | Candidates | Dopaminergic GPCR   | 0.0     | 0.0      | 8.2       | 8.2        | 1      | =      | 1.9      | 0.2    | 10.2   | 0.1     | 2.4      |
| Candidate-073 | Candidates | Gaba Receptors      | 0.0     | 0.0      | 5.8       | 5.8        | 1      | =      | 9.2      | 1.0    | 10.5   | 0.6     | 11.6     |
| Candidate-074 | Candidates | Peptide GPCR        |         |          |           |            | 0      |        |          |        |        |         |          |
| Candidate-075 | Candidates | Nicotinic Receptor  | 24.7    | 3.2      | 58.9      | -22.3      | 2      | =      | 1.3      | 0.1    | 9.4    | 0.1     | 1.6      |
| Candidate-076 | Candidates | Nicotinic Receptor  | 4.5     | 0.5      | 24.3      | 21.1       | 4      | =      | 1.2      | 0.1    | 4.9    | 0.0     | 1.4      |
| Candidate-077 | Candidates | Gaba Receptors      | 40.6    | 5.0      | 42.5      | -0.1       | 3      | =      | 1.3      | 0.2    | 14.2   | 0.1     | 1.8      |
| Candidate-078 | Candidates | Reuptake Inhibitors | 23.3    | 2.1      | 25.0      | 6.7        | 3      | =      | 1.8      | 0.3    | 18.4   | 0.1     | 2.1      |
| Candidate-079 | Candidates | Calcium Channels    |         |          |           |            |        |        |          |        |        |         |          |
| Candidate-080 | Candidates | Dopaminergic GPCR   | 0.0     | 0.0      | 12.6      | 12.6       | 1      | =      | 1.7      | 0.3    | 19.5   | 0.1     | 1.9      |
| Candidate-081 | Candidates | Serotonergic GPCR   | 0.0     | 0.0      | 32.4      | 32.4       | 1      | =      | 1.6      | 0.2    | 13.3   | 0.1     | 1.9      |
| Candidate-082 | Candidates | Gaba Receptors      | 142.1   | 1.9      | 8.6       | -3.3       | 4      | =      | 2.6      | 1.1    | 42.0   | 0.6     | 5.4      |
| Candidate-083 | Candidates | Cannabinoids        | 0.0     | 0.0      | 7.1       | 7.1        | 1      | =      | 2.0      | 0.6    | 28.2   | 0.3     | 3.5      |
| Candidate-084 | Candidates | Gaba Receptors      | 25.6    | 3.6      | 41.2      | 21.2       | 5      | =      | 1.2      | 0.3    | 27.1   | 0.2     | 1.7      |
| Candidate-085 | Candidates | Reuptake Inhibitors |         |          |           |            |        | =      | 2.1      | 0.6    | 26.2   | 0.3     | 3.0      |
| Candidate-086 | Candidates | Muscarinic Receptor | 0.0     | 0.0      | 23.0      | 23.0       | 1      | =      | 1.2      | 0.1    | 9.1    | 0.1     | 1.5      |
| Candidate-087 | Candidates | Cannabinoids        | 0.0     | 0.0      | 3.7       | 3.7        | 1      | >      | 1.5      | 0.0    | 0.0    | 0.0     | 1.5      |
| Candidate-088 | Candidates | Dopaminergic GPCR   | 0.0     | 0.0      | 16.7      | 16.7       | 1      | =      | 2.4      | 1.2    | 49.0   | 0.7     | 5.3      |
| Candidate-089 | Candidates | Enzyme              | 21.3    | 1.2      | 14.6      | 4.5        | 3      | =      | 3.2      | 0.4    | 11.3   | 0.1     | 3.4      |
| Candidate-090 | Candidates | Glutamate receptors | 0.0     | 0.0      | 18.2      | 18.2       | 1      | =      | 1.6      | 0.2    | 14.7   | 0.1     | 1.7      |
| Candidate-091 | Candidates | Gaba Receptors      | 33.3    | 3.8      | 36.3      | 3.4        | 3      | =      | 1.4      | 0.2    | 13.6   | 0.1     | 1.9      |
| Candidate-092 | Candidates | Reuptake Inhibitors | 0.0     | 0.0      | 11.9      | 11.9       | 1      | =      | 3.9      | 1.9    | 49.3   | 0.8     | 6.0      |
| Candidate-093 | Candidates | Muscarinic Receptor | 0.0     | 0.0      | 23.3      | 23.3       | 1      | =      | 1.4      | 0.3    | 18.9   | 0.1     | 2.0      |
| Candidate-094 | Candidates | Dopaminergic GPCR   | 79.0    | 3.8      | 55.1      | -41.5      | 2      | =      | 3.5      | 1.2    | 35.4   | 0.5     | 4.7      |
| Candidate-095 | Candidates | Gaba Receptors      |         |          |           |            | 0      | =      | 1.2      | 0.0    | 3.3    | 0.0     | 1.6      |
| Candidate-096 | Candidates | Serotonergic GPCR   | 0.0     | 0.0      | 36.0      | 36.0       | 1      |        |          |        |        |         |          |
| Candidate-097 | Candidates | Reuptake Inhibitors | 74.7    | 3.2      | 21.3      | -6.4       | 3      | =      | 3.3      | 0.6    | 16.6   | 0.3     | 4.7      |
| Candidate-098 | Candidates | Enzyme              | 2.0     | 0.0      | 2.0       | 1.4        | 2      | =      | 2.4      | 0.2    | 8.8    | 0.1     | 2.8      |
| Candidate-099 | Candidates | Peptide GPCR        | 43.0    | 1.8      | 28.0      | -16.5      | 2      | =      | 10.0     | 4.3    | 43.1   | 1.1     | 12.3     |
| Candidate-100 | Candidates | Enzyme              |         |          |           |            | 0      |        |          |        |        |         |          |
| Candidate-101 | Candidates | Dopaminergic GPCR   |         |          |           |            |        | =      | 4.4      | 1.2    | 28.1   | 0.9     | 15.6     |
| Candidate-102 | Candidates | Serotonergic GPCR   | 68.8    | 7.3      | 108.2     | -78.1      | 2      | =      | 1.9      | 0.5    | 26.2   | 0.2     | 2.3      |
| Candidate-103 | Candidates | Dopaminergic GPCR   |         |          |           |            | 0      |        |          |        |        |         |          |

| Pub-Name      | Set        | Target Mechanism   | Papp CV | Papp SEM | Papp Upp95 | Papp Low95 | Papp N | Pgp OP | Pgp Mean | Pgp SD | Pgp CV | Pgp SEM | Pgp Upp95 |
|---------------|------------|--------------------|---------|----------|------------|------------|--------|--------|----------|--------|--------|---------|-----------|
| Candidate-104 | Candidates | Peptide GPCR       | 64.1    | 3.9      | 27.6       | -6.3       | 3      | =      | 9.2      | 2.1    | 22.4   | 1.2     | 14.3      |
| Candidate-105 | Candidates | Gaba Receptors     | 43.8    | 2.8      | 21.6       | 3.8        | 4      | =      | 1.5      | 0.2    | 14.5   | 0.1     | 2.1       |
| Candidate-106 | Candidates | Peptide GPCR       | 0.0     | 0.0      | 16.8       | 16.8       | 1      | =      | 5.5      | 2.3    | 41.6   | 1.6     | 25.8      |
| Candidate-107 | Candidates | Calcium Channels   |         |          |            |            | 0      |        |          |        |        |         |           |
| Candidate-108 | Candidates | Nicotinic Receptor | 3.7     | 0.8      | 38.5       | 19.4       | 2      | =      | 1.2      | 0.2    | 18.2   | 0.1     | 1.6       |

| Pub-Name           | Set   | Target Mechanism    | Pgp Low95 | Pgp N | cFu,mi<br>c | CLIA<br>OP | CLIA<br>Mean | CLIA<br>SD | CLIA<br>CV | CLIA<br>SEM | CLIA<br>Upp95 | CLIA<br>Low95 | CLIA N | CLI_u  |
|--------------------|-------|---------------------|-----------|-------|-------------|------------|--------------|------------|------------|-------------|---------------|---------------|--------|--------|
| Acamprosate        | Drugs | Glutamate receptors |           | 0     | 0.984       |            |              |            |            |             |               |               | 0      |        |
| Alprazolam         | Drugs | Gaba Receptors      | 1.4       | 1     | 0.779       | <          | 7.6          | 0.4        | 4.9        | 0.2         | 8.5           | 6.6           | 3      | 9.7    |
| Amfebutamone       | Drugs | Dopaminergic GPCR   | 0.7       | 4     | 0.821       | =          | 27.2         | 6.1        | 22.5       | 3.5         | 42.4          | 12.0          | 3      | 33.1   |
| Amisulpride        | Drugs | Dopaminergic GPCR   | -14.2     | 3     | 0.614       | <          | 13.9         | 12.8       | 91.6       | 6.4         | 34.4          |               | 4      | 22.7   |
| Amphetamine        | Drugs | Reuptake Inhibitors |           |       | 0.741       |            |              |            |            |             |               |               |        |        |
| Aniracetam         | Drugs |                     | 1.1       | 1     | 0.962       |            |              |            |            |             |               |               | 0      |        |
| Apomorphine        | Drugs | Dopaminergic GPCR   | -70.0     | 2     | 0.302       | <          | 13.2         | 8.0        | 60.3       | 5.6         | 84.6          |               | 2      | 43.7   |
| Aprepitant         | Drugs |                     | 3.5       | 6     | 0.048       | <          | 13.9         | 8.8        | 63.6       | 3.6         | 23.2          | 4.5           | 6      | 289.4  |
| Aripiprazole       | Drugs | Dopaminergic GPCR   |           | 0     | 0.030       | =          | 31.7         | 11.5       | 36.2       | 4.3         | 42.1          | 21.3          | 7      | 1059.6 |
| Atomoxetine        | Drugs | Reuptake Inhibitors | 0.4       | 3     | 0.486       | =          | 138.6        | 30.1       | 21.7       | 17.4        | 213.3         | 63.9          | 3      | 285.2  |
| Bromazepam         | Drugs | Gaba Receptors      | 1.2       | 1     | 0.815       | <          | 7.6          |            |            |             | 7.6           | 7.6           | 2      | 9.3    |
| Bromocriptine      | Drugs | Dopaminergic GPCR   | 5.8       | 1     | 0.046       | >          | 265.2        | 64.4       | 24.3       | 37.2        | 425.0         | 105.5         | 3      | 5753.6 |
| Brotizolam         | Drugs | Gaba Receptors      | 0.8       | 3     | 0.845       | =          | 15.2         | 8.0        | 52.6       | 3.6         | 25.3          | 5.2           | 5      | 18.1   |
| Budipine           | Drugs | Calcium Channels    |           |       | 0.065       |            |              |            |            |             |               |               |        |        |
| Buprenorphine      | Drugs | Opioid Receptor     |           |       | 0.823       |            |              |            |            |             |               |               |        |        |
| Buspirone          | Drugs | Serotonergic GPCR   | 1.0       | 6     | 0.812       | =          | 147.5        | 30.8       | 20.9       | 12.6        | 180.2         | 114.8         | 6      | 181.7  |
| Cabergoline        | Drugs | Dopaminergic GPCR   | 4.8       | 4     | 0.570       | =          | 49.6         | 6.9        | 13.9       | 3.1         | 58.2          | 40.9          | 5      | 86.9   |
| Caffeine           | Drugs | Serotonergic GPCR   |           | 0     | 0.980       | <          | 6.9          | 0.5        | 7.9        | 0.3         | 8.3           | 5.6           | 3      | 7.1    |
| Carbamazepine      | Drugs | Reuptake Inhibitors | 0.9       | 6     | 0.936       | <          | 13.4         | 14.8       | 110.5      | 6.1         | 29.2          |               | 6      | 14.3   |
| Carisoprodol       | Drugs |                     | 1.2       | 1     | 0.977       | <          | 7.9          | 0.5        | 5.8        | 0.3         | 12.0          | 3.8           | 2      | 8.1    |
| Chlorpromazine     | Drugs | Dopaminergic GPCR   | 5.7       | 1     | 0.114       | =          | 61.2         | 14.5       | 23.7       | 7.2         | 84.4          | 38.0          | 4      | 538.4  |
| Citalopram         | Drugs | Serotonergic GPCR   | 1.3       | 4     | 0.690       | <          | 13.8         | 7.7        | 56.2       | 3.9         | 26.2          | 1.4           | 4      | 20.0   |
| Clomipramine       | Drugs | Serotonergic GPCR   | -1.7      | 4     | 0.047       | =          | 38.8         | 27.6       | 71.1       | 13.8        | 83.1          |               | 4      | 835.4  |
| Clonazepam         | Drugs | Gaba Receptors      | 1.3       | 1     | 0.641       | <          | 7.6          |            |            |             | 7.6           | 7.6           | 2      | 11.8   |
| Clozapine          | Drugs | Serotonergic GPCR   | 1.7       | 7     | 0.364       | =          | 26.1         | 10.3       | 39.4       | 3.0         | 32.3          | 19.9          | 12     | 71.7   |
| Cyclobenzaprine    | Drugs |                     | 2.8       | 1     | 0.104       | =          | 24.2         | 19.7       | 81.4       | 13.9        | 200.9         |               | 2      | 232.3  |
| Dexmethylphenidate | Drugs | Dopaminergic GPCR   |           |       | 0.870       |            |              |            |            |             |               |               |        |        |
| Dextropropoxyphene | Drugs | Opioid Receptor     |           | 0     | 0.225       | =          | 49.6         | 3.4        | 6.8        | 2.0         | 58.0          | 41.2          | 3      | 220.6  |
| Diazepam           | Drugs | Gaba Receptors      |           |       | 0.699       | <          | 8.0          | 0.6        | 7.9        | 0.5         | 13.7          | 2.3           | 2      | 11.5   |
| Donepezil          | Drugs | Enzyme              | 0.8       | 3     | 0.642       | <          | 9.6          | 3.7        | 38.1       | 1.6         | 14.3          | 5.0           | 5      | 15.0   |
| Dronabinol         | Drugs | Cannabinoids        |           |       | 0.004       |            |              |            |            |             |               |               |        |        |
| Duloxetine         | Drugs | Serotonergic GPCR   | -16.4     | 2     | 0.101       | =          | 31.8         | 9.6        | 30.3       | 4.8         | 47.2          | 16.3          | 4      | 313.6  |
| Eletriptan         | Drugs | Serotonergic GPCR   | 19.4      | 18    | 0.897       | =          | 29.3         | 11.0       | 37.4       | 4.5         | 41.0          | 17.7          | 6      | 32.7   |
| Escitalopram       | Drugs | Serotonergic GPCR   | 1.3       | 4     | 0.690       | <          | 10.7         | 5.4        | 50.9       | 3.1         | 24.2          |               | 3      | 15.5   |
| Eszopiclone        | Drugs | Gaba Receptors      |           |       | 0.808       |            |              |            |            |             |               |               |        |        |
| Ethosuximide       | Drugs | Calcium Channels    |           |       | 0.897       |            |              |            |            |             |               |               |        |        |
| Felbamate          | Drugs | Gaba Receptors      |           | 0     | 0.992       | <          | 7.6          |            |            |             | 7.6           | 7.6           | 1      | 7.6    |

| Pub-Name             | Set   | Target Mechanism    | Pgp Low95 | Pgp N | cFu,mi<br>c | CLIA<br>OP | CLIA<br>Mean | CLIA<br>SD | CLIA<br>CV | CLIA<br>SEM | CLIA<br>Upp95 | CLIA<br>Low95 | CLIA N | CLI_u  |
|----------------------|-------|---------------------|-----------|-------|-------------|------------|--------------|------------|------------|-------------|---------------|---------------|--------|--------|
| Fentanyl             | Drugs | Opioid Receptor     |           |       | 0.662       | =          | 30.5         | 2.9        | 9.6        | 1.7         | 37.8          | 23.3          | 3      | 46.1   |
| Flumazenil           | Drugs | Gaba Receptors      | 0.7       | 3     | 0.951       | <          | 10.0         | 3.9        | 38.7       | 1.9         | 16.1          | 3.8           | 4      | 10.5   |
| Fluoxetine           | Drugs | Serotonergic GPCR   | -2.6      | 4     | 0.060       | =          | 33.5         | 21.9       | 65.3       | 8.9         | 56.8          | 10.3          | 6      | 563.9  |
| Fluvoxamine          | Drugs | Serotonergic GPCR   | 0.5       | 5     | 0.349       | <          | 20.8         | 14.1       | 67.6       | 5.3         | 33.6          | 8.1           | 7      | 59.7   |
| Gabapentin           | Drugs | Calcium Channels    |           | 0     | 0.973       | <          | 6.6          |            |            |             | 6.6           | 6.6           | 1      | 6.8    |
| Galantamine          | Drugs | Enzyme              | 0.7       | 3     | 1.000       | <          | 7.6          |            |            |             | 7.6           | 7.6           | 2      | 7.6    |
| Haloperidol          | Drugs | Dopaminergic GPCR   |           | 0     | 0.661       | <          | 12.9         | 7.6        | 58.8       | 5.4         | 81.3          |               | 2      | 19.6   |
| Hydrocodone          | Drugs | Opioid Receptor     | 1.3       | 1     | 0.952       | <          | 9.5          | 3.4        | 36.0       | 2.0         | 18.1          | 1.0           | 3      | 10.0   |
| Indeloxazine         | Drugs | Reuptake Inhibitors | 1.4       | 1     | 0.882       | <          | 7.6          |            |            |             | 7.6           | 7.6           | 2      | 8.6    |
| Lamotrigine          | Drugs | Reuptake Inhibitors | 1.0       | 5     | 0.779       | <          | 12.4         | 13.8       | 110.6      | 5.2         | 24.9          |               | 7      | 16.0   |
| Levetiracetam        | Drugs | Calcium Channels    | 1.3       | 1     | 0.975       | <          | 6.6          |            |            |             | 6.6           | 6.6           | 1      | 6.8    |
| Levomethadyl Acetate | Drugs | Opioid Receptor     |           |       | 0.304       | =          | 45.5         | 3.5        | 7.6        | 2.0         | 54.1          | 36.9          | 3      | 149.7  |
| Lofexidine           | Drugs |                     | 0.8       | 2     | 0.758       | <          | 11.0         | 2.9        | 26.9       | 1.7         | 18.3          | 3.6           | 3      | 14.5   |
| Lorazepam            | Drugs | Gaba Receptors      | 1.0       | 2     | 0.719       | <          | 8.0          | 0.7        | 8.8        | 0.3         | 8.9           | 7.2           | 5      | 11.2   |
| Meprobamate          | Drugs |                     |           |       | 0.988       |            |              |            |            |             |               |               |        |        |
| Methylphenidate      | Drugs | Dopaminergic GPCR   | 1.1       | 1     | 0.870       | <          | 10.5         | 2.4        | 23.2       | 1.2         | 14.3          | 6.6           | 4      | 12.0   |
| Metoclopramide       | Drugs |                     |           |       | 0.895       |            |              |            |            |             |               |               |        |        |
| Midazolam            | Drugs | Gaba Receptors      |           |       | 0.686       | =          | 184.7        | 52.4       | 28.4       | 4.7         | 194.6         | 174.8         | 124    | 269.2  |
| Milnacipran          | Drugs | Serotonergic GPCR   |           |       | 0.927       |            |              |            |            |             |               |               |        |        |
| Minaprine            | Drugs | Enzyme              | 0.8       | 3     | 0.747       | =          | 122.5        | 12.4       | 10.1       | 7.1         | 153.2         | 91.8          | 3      | 163.9  |
| Mirtazapine          | Drugs |                     | 1.1       | 5     | 0.828       | <          | 15.6         | 9.6        | 61.5       | 3.9         | 25.8          | 5.4           | 6      | 18.9   |
| Moclobemide          | Drugs | Enzyme              | 1.0       | 3     | 0.822       | <          | 7.6          |            |            |             | 7.6           | 7.6           | 3      | 9.2    |
| Modafinil            | Drugs | Dopaminergic GPCR   |           | 0     | 0.891       | <          | 7.6          |            |            |             | 7.6           | 7.6           | 1      | 8.5    |
| Morphine             | Drugs | Opioid Receptor     |           |       | 0.875       | =          | 19.5         | 5.5        | 28.1       | 3.2         | 33.1          | 5.9           | 3      | 22.3   |
| Nalmefene            | Drugs | Opioid Receptor     | 1.0       | 3     | 0.867       | =          | 11.4         | 1.4        | 12.0       | 0.8         | 14.8          | 8.0           | 3      | 13.1   |
| Naltrexone           | Drugs | Opioid Receptor     | 0.9       | 3     | 0.920       | <          | 10.0         | 3.3        | 32.4       | 1.2         | 13.0          | 7.1           | 7      | 10.9   |
| Nemonapride          | Drugs | Dopaminergic GPCR   | 1.3       | 3     | 0.393       | =          | 164.8        | 17.2       | 10.4       | 9.9         | 207.5         | 122.1         | 3      | 419.7  |
| Nicergoline          | Drugs |                     |           |       | 0.399       |            |              |            |            |             |               |               |        |        |
| Nicotrol             | Drugs | Nicotinic Receptor  | -2.1      | 2     | 0.832       | =          | 18.6         |            |            |             | 18.6          | 18.6          | 1      | 22.4   |
| Nimodipine           | Drugs | Calcium Channels    | 1.2       | 4     | 0.271       | >          | 302.2        | 0.5        | 0.2        | 0.2         | 302.7         | 301.7         | 8      | 1115.6 |
| Nortriptyline        | Drugs |                     |           |       | 0.230       |            |              |            |            |             |               |               |        |        |
| Olanzapine           | Drugs | Dopaminergic GPCR   | 1.5       | 7     | 0.645       | <          | 11.3         | 5.6        | 49.3       | 2.1         | 16.4          | 6.3           | 7      | 17.6   |
| Oxcarbazepine        | Drugs | Reuptake Inhibitors | 0.3       | 3     | 1.000       | <          | 8.9          | 1.1        | 12.9       | 0.7         | 11.7          | 6.0           | 3      | 8.9    |
| Oxycodone            | Drugs | Opioid Receptor     | 1.1       | 1     | 0.891       | <          | 10.6         | 3.3        | 30.8       | 1.6         | 15.8          | 5.4           | 4      | 11.9   |
| Paliperidone         | Drugs | Dopaminergic GPCR   | 2.2       | 3     | 0.778       | <          | 7.6          |            |            |             | 7.6           | 7.6           | 4      | 9.7    |
| Paroxetine           | Drugs | Serotonergic GPCR   | -0.6      | 4     | 0.084       | =          | 95.1         | 46.4       | 48.7       | 26.8        | 210.2         |               | 3      | 1126.7 |
| Pergolide            | Drugs | Dopaminergic GPCR   | 1.0       | 3     | 0.446       | >          | 278.9        | 35.6       | 12.8       | 20.6        | 367.4         | 190.4         | 3      | 625.4  |



| Pub-Name      | Set   | Target Mechanism    | Pgp Low95 | Pgp N | cFu,mi c | CLIA OP | CLIA Mean | CLIA SD | CLIA CV | CLIA SEM | CLIA Upp95 | CLIA Low95 | CLIA N | CLI_u  |
|---------------|-------|---------------------|-----------|-------|----------|---------|-----------|---------|---------|----------|------------|------------|--------|--------|
| Perospirone   | Drugs | Dopaminergic GPCR   | 2.7       | 3     | 0.388    | >       | 296.6     | 10.1    | 3.4     | 5.8      | 321.7      | 271.5      | 3      | 763.8  |
| phenytoin     | Drugs | Reuptake Inhibitors | 0.9       | 6     | 0.520    | <       | 8.1       | 1.1     | 13.2    | 0.3      | 8.8        | 7.3        | 10     | 15.5   |
| Piracetam     | Drugs |                     |           | 0     | 0.977    |         |           |         |         |          |            |            | 0      |        |
| Pramipexole   | Drugs | Dopaminergic GPCR   | -2.5      | 2     | 0.859    | <       | 11.7      | 7.2     | 61.5    | 4.2      | 29.6       |            | 3      | 13.6   |
| Pregabalin    | Drugs | Calcium Channels    |           | 0     | 0.975    |         |           |         |         |          |            |            | 0      |        |
| Propofol      | Drugs |                     |           | 0     | 0.272    |         |           |         |         |          |            |            | 0      |        |
| Propoxyphene  | Drugs |                     |           |       | 0.225    |         |           |         |         |          |            |            |        |        |
| Quazepam      | Drugs | Gaba Receptors      |           |       | 0.348    |         |           |         |         |          |            |            | 0      |        |
| Quetiapine    | Drugs | Serotonergic GPCR   | 0.7       | 4     | 0.556    | =       | 125.9     | 49.7    | 39.4    | 20.3     | 178.6      | 73.2       | 6      | 226.6  |
| Ramelteon     | Drugs | Melatonin Receptor  | 0.8       | 3     | 0.820    | =       | 49.8      | 9.8     | 19.7    | 4.9      | 65.5       | 34.2       | 4      | 60.8   |
| Rasagiline    | Drugs | Enzyme              | 1.0       | 1     | 0.890    | =       | 22.5      | 5.0     | 22.0    | 2.9      | 34.9       | 10.2       | 3      | 25.3   |
| Reboxetine    | Drugs | Reuptake Inhibitors | 0.4       | 3     | 0.647    | <       | 12.0      | 6.8     | 56.5    | 3.4      | 22.8       | 1.2        | 4      | 18.5   |
| Remifentanyl  | Drugs | Opioid Receptor     |           |       | 0.962    |         |           |         |         |          |            |            |        |        |
| Riluzole      | Drugs | Reuptake Inhibitors | 0.3       | 3     | 0.633    | =       | 21.6      | 9.4     | 43.2    | 4.7      | 36.6       | 6.7        | 4      | 34.1   |
| Rimonabant    | Drugs | Cannabinoids        | 0.1       | 4     | 0.015    | =       | 58.8      | 30.8    | 52.5    | 15.4     | 108.1      | 9.4        | 4      | 3997.2 |
| Risperidone   | Drugs | Dopaminergic GPCR   | 2.3       | 9     | 0.782    | =       | 36.6      | 5.2     | 14.3    | 1.6      | 36.6       | 36.6       | 11     | 46.8   |
| Rivastigmine  | Drugs | Enzyme              | 0.8       | 4     | 0.956    | <       | 7.8       | 0.4     | 4.8     | 0.2      | 8.5        | 7.2        | 4      | 8.2    |
| Ropinirole    | Drugs | Dopaminergic GPCR   | 0.9       | 5     | 0.647    | <       | 10.3      | 3.0     | 29.2    | 1.3      | 14.1       | 6.5        | 5      | 15.9   |
| Ropivacaine   | Drugs |                     | 0.8       | 4     | 0.927    | =       | 42.2      | 7.1     | 16.9    | 3.6      | 53.6       | 30.8       | 4      | 45.5   |
| Selegiline    | Drugs | Enzyme              |           |       | 0.717    |         |           |         |         |          |            |            |        |        |
| Sertindole    | Drugs | Serotonergic GPCR   | -41.9     | 2     | 0.077    | =       | 28.3      | 9.6     | 33.8    | 6.8      | 114.1      |            | 2      | 369.0  |
| Sertraline    | Drugs | Serotonergic GPCR   | 11.2      | 1     | 0.033    | =       | 35.3      | 18.1    | 51.1    | 6.4      | 50.7       | 20.0       | 8      | 1064.6 |
| Sinequan      | Drugs | Serotonergic GPCR   | -1.7      | 2     | 0.493    | =       | 41.3      | 10.3    | 24.8    | 5.1      | 57.7       | 24.9       | 4      | 83.8   |
| Sulpiride     | Drugs | Dopaminergic GPCR   |           |       | 0.984    |         |           |         |         |          |            |            | 0      |        |
| Tacrine       | Drugs | Enzyme              | 0.5       | 5     | 0.824    | =       | 27.4      | 8.2     | 30.1    | 2.9      | 34.4       | 20.4       | 8      | 33.2   |
| Talipexole    | Drugs | Dopaminergic GPCR   | 0.6       | 3     | 0.994    |         |           |         |         |          |            |            | 0      |        |
| Terguride     | Drugs | Dopaminergic GPCR   |           |       | 0.777    |         |           |         |         |          |            |            |        |        |
| Thiopental    | Drugs | Gaba Receptors      |           |       | 0.917    |         |           |         |         |          |            |            |        |        |
| Tiagabine     | Drugs | Gaba Receptors      | 1.1       | 3     | 0.832    | <       | 8.1       | 1.2     | 14.7    | 0.5      | 9.6        | 6.6        | 5      | 9.7    |
| Tianeptine    | Drugs | Reuptake Inhibitors | 1.1       | 3     | 0.861    | <       | 7.6       |         |         |          | 7.6        | 7.6        | 3      | 8.8    |
| Topiramate    | Drugs | Enzyme              | 0.9       | 3     | 0.841    | <       | 8.7       | 1.5     | 16.7    | 0.7      | 11.1       | 6.4        | 4      | 10.4   |
| Tramadol      | Drugs | Reuptake Inhibitors |           | 0     | 0.840    | <       | 7.6       |         |         |          | 7.6        | 7.6        | 2      | 9.0    |
| Trazodone     | Drugs | Serotonergic GPCR   |           |       | 0.597    |         |           |         |         |          |            |            |        |        |
| Tropisetron   | Drugs | Serotonergic GPCR   | 0.8       | 3     | 0.708    | =       | 15.6      | 7.8     | 49.9    | 4.5      | 35.0       |            | 3      | 22.1   |
| Valproic Acid | Drugs |                     |           | 0     | 0.946    |         |           |         |         |          |            |            | 0      |        |
| Varenicline   | Drugs | Nicotinic Receptor  | 1.0       | 15    | 1.000    | <       | 10.1      | 5.1     | 50.4    | 2.5      | 18.3       | 2.0        | 4      | 10.1   |
| Venlafaxine   | Drugs | Serotonergic GPCR   | 1.0       | 4     | 0.492    | <       | 11.9      | 5.7     | 48.1    | 2.3      | 17.9       | 5.8        | 6      | 24.1   |

| Pub-Name      | Set        | Target Mechanism    | Pgp Low95 | Pgp N | cFu,mi c | CLIA OP | CLIA Mean | CLIA SD | CLIA CV | CLIA SEM | CLIA Upp95 | CLIA Low95 | CLIA N | CLI_u  |
|---------------|------------|---------------------|-----------|-------|----------|---------|-----------|---------|---------|----------|------------|------------|--------|--------|
| Verapamil     | Drugs      | Calcium Channels    | -8.8      | 2     | 0.420    | =       | 97.0      | 31.2    | 32.1    | 5.4      | 108.4      | 85.6       | 33     | 231.3  |
| Vigabatrin    | Drugs      | Gaba Receptors      |           | 0     | 0.972    |         |           |         |         |          |            |            | 0      |        |
| Vinpocetine   | Drugs      |                     | 0.7       | 4     | 0.334    |         |           |         |         |          |            |            | 0      |        |
| Zaleplon      | Drugs      | Gaba Receptors      | 1.4       | 1     | 0.562    | =       | 14.4      | 4.5     | 31.4    | 2.3      | 21.6       | 7.2        | 4      | 25.6   |
| Ziprasidone   | Drugs      | Dopaminergic GPCR   | 0.0       | 3     | 0.216    | =       | 41.4      | 8.2     | 19.7    | 2.9      | 48.3       | 34.5       | 8      | 191.4  |
| Zolpidem      | Drugs      | Gaba Receptors      | 1.2       | 1     | 0.807    | <       | 8.5       | 1.4     | 16.8    | 0.7      | 10.7       | 6.2        | 4      | 10.5   |
| Zonisamide    | Drugs      | Enzyme              | 0.9       | 3     | 0.894    | <       | 10.0      | 6.0     | 60.0    | 2.5      | 16.4       | 3.6        | 6      | 11.2   |
| Zotepine      | Drugs      | Serotonergic GPCR   | 5.1       | 1     | 0.030    | =       | 48.2      | 25.4    | 52.7    | 14.7     | 111.4      |            | 3      | 1624.1 |
| Candidate-001 | Candidates | Glutamate receptors |           | 0     | 0.865    |         |           |         |         |          |            |            | 0      |        |
| Candidate-002 | Candidates | Reuptake Inhibitors | 1.0       | 4     | 0.285    | <       | 48.0      | 29.8    | 62.2    | 13.3     | 85.4       | 10.6       | 5      | 168.3  |
| Candidate-003 | Candidates | Reuptake Inhibitors | -13.6     | 2     | 0.078    | =       | 37.3      | 19.8    | 53.1    | 9.9      | 69.0       | 5.6        | 4      | 479.7  |
| Candidate-004 | Candidates | Serotonergic GPCR   |           |       | 0.956    |         |           |         |         |          |            |            |        |        |
| Candidate-005 | Candidates | Enzyme              |           | 0     | 0.451    |         |           |         |         |          |            |            | 0      |        |
| Candidate-006 | Candidates | Peptide GPCR        |           |       | 0.739    |         |           |         |         |          |            |            |        |        |
| Candidate-007 | Candidates | Enzyme              | 4.0       | 5     | 0.602    | =       | 18.5      | 9.9     | 53.4    | 4.9      | 34.3       | 2.7        | 4      | 30.7   |
| Candidate-008 | Candidates | Calcium Channels    |           | 0     | 0.968    |         |           |         |         |          |            |            | 0      |        |
| Candidate-009 | Candidates | Nicotinic Receptor  |           | 0     | 0.997    | <       | 23.4      | 12.6    | 53.7    | 6.3      | 43.5       | 3.3        | 4      | 23.5   |
| Candidate-010 | Candidates | Opioid Receptor     | 1.9       | 3     | 0.609    | =       | 25.2      | 3.3     | 13.2    | 2.4      | 55.1       |            | 2      | 41.4   |
| Candidate-011 | Candidates | Dopaminergic GPCR   | 2.1       | 2     | 0.297    | =       | 71.2      | 74.8    | 105.0   | 37.4     | 190.8      |            | 4      | 239.5  |
| Candidate-012 | Candidates | Peptide GPCR        | 0.8       | 3     | 0.043    | =       | 30.1      | 13.4    | 44.7    | 6.7      | 51.5       | 8.6        | 4      | 692.5  |
| Candidate-013 | Candidates | Enzyme              | 1.2       | 12    | 0.410    | =       | 45.1      |         |         |          | 45.1       | 45.1       | 1      | 110.1  |
| Candidate-014 | Candidates | Opioid Receptor     | 1.2       | 3     | 0.678    | =       | 36.4      | 1.5     | 4.2     | 1.1      | 50.1       | 22.6       | 2      | 53.6   |
| Candidate-015 | Candidates | Nicotinic Receptor  | 0.9       | 3     | 1.000    | <       | 8.3       | 1.2     | 13.8    | 0.7      | 11.2       | 5.5        | 3      | 8.3    |
| Candidate-016 | Candidates | Gaba Receptors      | 1.2       | 5     | 0.982    | <       | 9.9       | 2.7     | 27.3    | 0.9      | 12.0       | 7.8        | 9      | 10.1   |
| Candidate-017 | Candidates | Enzyme              | 3.1       | 1     | 0.795    | <       | 7.6       |         |         |          | 7.6        | 7.6        | 1      | 9.5    |
| Candidate-018 | Candidates | Cannabinoids        | 1.8       | 4     | 0.064    | <       | 12.8      | 9.2     | 71.7    | 3.7      | 22.5       | 3.1        | 6      | 201.1  |
| Candidate-019 | Candidates | Peptide GPCR        | -4.3      | 2     | 0.087    | =       | 44.2      | 7.1     | 16.1    | 4.1      | 61.8       | 26.5       | 3      | 509.5  |
| Candidate-020 | Candidates | Glutamate receptors | 3.0       | 1     | 0.673    | =       | 35.4      | 2.0     | 5.6     | 1.4      | 53.3       | 17.6       | 2      | 52.6   |
| Candidate-021 | Candidates | Enzyme              | 4.6       | 12    | 0.906    | <       | 19.4      | 13.8    | 71.4    | 6.2      | 36.7       | 2.0        | 5      | 21.4   |
| Candidate-022 | Candidates | Enzyme              | 8.9       | 3     | 0.184    | >       | 232.8     | 53.0    | 22.8    | 20.0     | 280.8      | 184.7      | 7      | 1263.6 |
| Candidate-023 | Candidates | Nicotinic Receptor  | 0.9       | 4     | 0.948    | <       | 7.7       | 0.9     | 11.9    | 0.4      | 8.8        | 6.5        | 5      | 8.1    |
| Candidate-024 | Candidates | Calcium Channels    |           | 0     | 0.980    |         |           |         |         |          |            |            | 0      |        |
| Candidate-025 | Candidates | Reuptake Inhibitors | 3.5       | 3     | 0.066    | =       | 74.9      | 20.6    | 27.5    | 11.9     | 126.1      | 23.8       | 3      | 1144.2 |
| Candidate-026 | Candidates | Serotonergic GPCR   | 1.1       | 4     | 0.082    | =       | 49.4      | 49.8    | 100.8   | 18.8     | 94.5       | 4.2        | 7      | 603.1  |
| Candidate-027 | Candidates | Serotonergic GPCR   | 16.0      | 1     | 0.386    | =       | 41.4      | 11.3    | 27.3    | 6.5      | 69.5       | 13.4       | 3      | 107.5  |
| Candidate-028 | Candidates | Histaminergic GPCR  | 1.0       | 4     | 0.938    | <       | 12.3      | 4.9     | 39.5    | 1.7      | 16.5       | 8.2        | 8      | 13.2   |
| Candidate-029 | Candidates | Glutamate receptors | 0.1       | 2     | 0.927    | =       | 26.3      | 10.9    | 41.2    | 7.7      | 123.8      |            | 2      | 28.4   |

| Pub-Name      | Set        | Target Mechanism    | Pgp<br>Low95 | Pgp N | cFu,<br>mi<br>c | CLIA<br>OP | CLIA<br>Mean | CLIA<br>SD | CLIA<br>CV | CLIA<br>SEM | CLIA<br>Upp95 | CLIA<br>Low95 | CLIA N | CLI_u  |
|---------------|------------|---------------------|--------------|-------|-----------------|------------|--------------|------------|------------|-------------|---------------|---------------|--------|--------|
| Candidate-030 | Candidates | Peptide GPCR        | 0.9          | 3     | 0.811           | =          | 229.2        | 20.8       | 9.1        | 12.0        | 280.8         | 177.6         | 3      | 282.6  |
| Candidate-031 | Candidates | Serotonergic GPCR   | 1.0          | 5     | 0.748           | =          | 150.0        | 28.2       | 18.8       | 12.6        | 185.3         | 114.7         | 5      | 200.7  |
| Candidate-032 | Candidates | Gaba Receptors      | 1.0          | 4     | 0.992           | <          | 13.7         | 7.4        | 53.9       | 3.7         | 25.4          | 1.9           | 4      | 13.8   |
| Candidate-033 | Candidates | Opioid Receptor     | 2.3          | 14    | 0.594           | <          | 22.4         | 15.3       | 68.6       | 4.9         | 32.5          | 12.2          | 10     | 37.6   |
| Candidate-034 | Candidates | Reuptake Inhibitors | 2.7          | 4     | 0.228           | <          | 32.4         | 21.9       | 67.6       | 6.3         | 45.7          | 19.1          | 12     | 142.3  |
| Candidate-035 | Candidates | Calcium Channels    |              | 0     | 0.992           |            |              |            |            |             |               |               | 0      |        |
| Candidate-036 | Candidates | Peptide GPCR        |              | 0     | 0.002           |            |              |            |            |             |               |               | 0      |        |
| Candidate-037 | Candidates | Gaba Receptors      | 0.7          | 7     | 0.763           | =          | 43.6         | 14.1       | 32.2       | 7.0         | 66.1          | 21.2          | 4      | 57.2   |
| Candidate-038 | Candidates | Serotonergic GPCR   |              | 0     | 0.164           |            |              |            |            |             |               |               | 0      |        |
| Candidate-039 | Candidates | Glutamate receptors | 4.5          | 9     | 0.195           | =          | 77.7         | 6.2        | 8.0        | 3.6         | 93.2          | 62.2          | 3      | 399.2  |
| Candidate-040 | Candidates | Enzyme              | 1.3          | 1     | 0.559           | <          | 7.2          |            |            |             | 7.2           | 7.2           | 1      | 12.8   |
| Candidate-041 | Candidates | Peptide GPCR        | 3.2          | 24    | 0.171           | =          | 44.6         | 17.7       | 39.7       | 8.9         | 73.0          | 16.3          | 4      | 261.7  |
| Candidate-042 | Candidates | Serotonergic GPCR   | 1.2          | 3     | 0.220           | <          | 19.9         | 30.3       | 151.9      | 11.5        | 47.4          |               | 7      | 90.7   |
| Candidate-043 | Candidates | Peptide GPCR        | 2.0          | 3     | 0.878           | <          | 14.4         | 10.9       | 75.9       | 5.5         | 31.9          |               | 4      | 16.4   |
| Candidate-044 | Candidates | Serotonergic GPCR   | 5.7          | 11    | 0.115           | =          | 58.5         | 45.5       | 77.8       | 18.6        | 106.9         | 10.2          | 6      | 507.1  |
| Candidate-045 | Candidates | Cannabinoids        | 6.0          | 1     | 0.123           | =          | 22.3         |            |            |             | 22.3          | 22.3          | 1      | 181.8  |
| Candidate-046 | Candidates | Serotonergic GPCR   | -4.2         | 9     | 0.068           | =          | 86.3         | 23.8       | 27.5       | 10.6        | 116.0         | 56.5          | 5      | 1274.3 |
| Candidate-047 | Candidates | Calcium Channels    |              |       | 0.979           | =          | 8.3          |            |            |             | 8.3           | 8.3           | 1      | 8.5    |
| Candidate-048 | Candidates | Dopaminergic GPCR   | 2.6          | 6     | 0.069           | =          | 39.4         | 17.1       | 43.3       | 8.5         | 66.7          | 12.1          | 4      | 572.1  |
| Candidate-049 | Candidates | Serotonergic GPCR   | 3.0          | 9     | 0.080           | =          | 90.2         | 35.6       | 39.5       | 13.5        | 122.6         | 57.9          | 7      | 1126.6 |
| Candidate-050 | Candidates | Gaba Receptors      | -0.4         | 3     | 0.617           | <          | 10.3         | 5.6        | 54.4       | 3.2         | 24.3          |               | 3      | 16.7   |
| Candidate-051 | Candidates | Reuptake Inhibitors | 2.0          | 3     | 0.232           | <          | 16.2         | 14.9       | 92.0       | 6.1         | 32.1          | 0.4           | 6      | 70.0   |
| Candidate-052 | Candidates | Enzyme              |              | 0     | 0.012           |            |              |            |            |             |               |               | 0      |        |
| Candidate-053 | Candidates | Nicotinic Receptor  | 1.1          | 6     | 0.948           | <          | 12.6         | 4.3        | 33.7       | 1.7         | 17.2          | 8.1           | 6      | 13.3   |
| Candidate-054 | Candidates | Opioid Receptor     |              | 0     | 0.028           |            |              |            |            |             |               |               | 0      |        |
| Candidate-055 | Candidates | Enzyme              | 0.3          | 3     | 0.270           | =          | 84.8         | 35.2       | 41.5       | 20.3        | 172.1         |               | 3      | 313.8  |
| Candidate-056 | Candidates | Enzyme              | 1.5          | 6     | 0.156           | =          | 37.4         | 2.6        | 7.0        | 1.3         | 41.6          | 33.2          | 4      | 239.1  |
| Candidate-057 | Candidates | Dopaminergic GPCR   |              | 0     | 0.242           |            |              |            |            |             |               |               | 0      |        |
| Candidate-058 | Candidates | Peptide GPCR        | 1.2          | 1     | 0.265           | =          | 21.7         | 1.5        | 6.7        | 1.0         | 34.8          | 8.6           | 2      | 81.9   |
| Candidate-059 | Candidates | Dopaminergic GPCR   |              | 0     | 0.023           | =          | 31.9         |            |            |             | 31.9          | 31.9          | 1      | 1417.9 |
| Candidate-060 | Candidates | Serotonergic GPCR   |              | 0     | 0.079           | =          | 64.9         | 29.1       | 44.8       | 13.0        | 101.3         | 28.5          | 5      | 821.3  |
| Candidate-061 | Candidates | Histaminergic GPCR  | 1.1          | 4     | 0.869           | <          | 11.3         | 6.5        | 57.2       | 2.9         | 19.5          | 3.2           | 5      | 13.1   |
| Candidate-062 | Candidates | Dopaminergic GPCR   | 2.7          | 1     | 0.083           | =          | 37.4         | 21.4       | 57.2       | 10.7        | 71.6          | 3.2           | 4      | 451.0  |
| Candidate-063 | Candidates | Nicotinic Receptor  | 1.1          | 3     | 0.936           | <          | 9.9          | 1.8        | 18.5       | 0.7         | 11.9          | 8.0           | 6      | 10.6   |
| Candidate-064 | Candidates | Serotonergic GPCR   | 0.3          | 3     | 0.320           | <          | 46.7         | 30.8       | 65.9       | 15.4        | 96.0          |               | 4      | 145.9  |
| Candidate-065 | Candidates | Peptide GPCR        | 0.9          | 3     | 0.103           | =          | 98.6         | 39.2       | 39.8       | 22.7        | 196.0         | 1.2           | 3      | 961.1  |
| Candidate-066 | Candidates | Serotonergic GPCR   | 0.5          | 3     | 0.641           | =          | 134.5        | 34.7       | 25.8       | 20.0        | 220.6         | 48.3          | 3      | 209.9  |

| Pub-Name      | Set        | Target Mechanism    | Pgp Low95 | Pgp N | cFu,mi c | CLIA OP | CLIA Mean | CLIA SD | CLIA CV | CLIA SEM | CLIA Upp95 | CLIA Low95 | CLIA N | CLI_u   |
|---------------|------------|---------------------|-----------|-------|----------|---------|-----------|---------|---------|----------|------------|------------|--------|---------|
| Candidate-067 | Candidates | Dopaminergic GPCR   |           | 0     | 0.016    | =       | 45.8      | 14.4    | 31.5    | 7.2      | 68.9       | 22.7       | 4      | 2901.0  |
| Candidate-068 | Candidates | Serotonergic GPCR   | 1.0       | 1     | 0.024    | >       | 248.8     | 92.8    | 37.3    | 53.6     | 479.3      | 18.3       | 3      | 10238.5 |
| Candidate-069 | Candidates | Reuptake Inhibitors | 3.5       | 3     | 0.132    | =       | 49.9      | 10.2    | 20.4    | 5.9      | 75.2       | 24.6       | 3      | 377.4   |
| Candidate-070 | Candidates | Dopaminergic GPCR   | 0.2       | 2     | 1.000    | <       | 14.2      | 9.4     | 66.3    | 6.7      | 98.9       |            | 2      | 14.2    |
| Candidate-071 | Candidates | Reuptake Inhibitors | 2.3       | 4     | 1.000    | =       | 28.6      | 1.7     | 5.8     | 0.8      | 31.3       | 26.0       | 4      | 28.6    |
| Candidate-072 | Candidates | Dopaminergic GPCR   | 1.4       | 3     | 0.239    | =       | 24.1      |         |         |          | 24.1       | 24.1       | 1      | 100.9   |
| Candidate-073 | Candidates | Gaba Receptors      | 6.8       | 3     | 0.785    | =       | 14.6      | 2.5     | 17.2    | 0.9      | 16.8       | 12.3       | 7      | 18.5    |
| Candidate-074 | Candidates | Peptide GPCR        |           | 0     | 0.004    | =       | 43.0      |         |         |          | 43.0       | 43.0       | 1      | 10476.8 |
| Candidate-075 | Candidates | Nicotinic Receptor  | 1.0       | 3     | 0.997    | <       | 21.6      | 7.0     | 32.5    | 2.0      | 25.8       | 17.3       | 12     | 21.6    |
| Candidate-076 | Candidates | Nicotinic Receptor  | 1.1       | 3     | 0.795    | <       | 10.4      | 5.7     | 54.8    | 2.9      | 19.5       | 1.3        | 4      | 13.1    |
| Candidate-077 | Candidates | Gaba Receptors      | 0.9       | 3     | 0.461    | =       | 164.4     | 25.4    | 15.4    | 12.7     | 205.0      | 123.8      | 4      | 356.8   |
| Candidate-078 | Candidates | Reuptake Inhibitors | 1.5       | 7     | 0.597    | <       | 20.2      | 14.6    | 72.1    | 4.9      | 31.4       | 9.1        | 9      | 33.9    |
| Candidate-079 | Candidates | Calcium Channels    |           | 0     | 0.972    | <       | 7.6       |         |         |          | 7.6        | 7.6        | 1      | 7.8     |
| Candidate-080 | Candidates | Dopaminergic GPCR   | 1.6       | 27    | 0.268    | =       | 30.2      |         |         |          | 30.2       | 30.2       | 1      | 112.5   |
| Candidate-081 | Candidates | Serotonergic GPCR   | 1.2       | 4     | 0.642    | =       | 28.2      | 15.5    | 55.1    | 6.3      | 44.7       | 11.7       | 6      | 43.9    |
| Candidate-082 | Candidates | Gaba Receptors      | -0.1      | 3     | 0.850    | <       | 13.4      | 10.1    | 75.2    | 5.8      | 38.3       |            | 3      | 15.7    |
| Candidate-083 | Candidates | Cannabinoids        | 0.6       | 3     | 0.061    | <       | 12.7      | 5.2     | 40.7    | 3.0      | 25.5       |            | 3      | 206.5   |
| Candidate-084 | Candidates | Gaba Receptors      | 0.7       | 4     | 0.847    | =       | 44.3      | 32.5    | 73.4    | 10.3     | 65.9       | 22.7       | 10     | 52.3    |
| Candidate-085 | Candidates | Reuptake Inhibitors | 1.2       | 4     | 0.712    | =       | 14.8      | 4.0     | 27.1    | 2.3      | 24.7       | 4.8        | 3      | 20.8    |
| Candidate-086 | Candidates | Muscarinic Receptor | 1.0       | 3     | 0.871    | =       | 38.5      |         |         |          | 38.5       | 38.5       | 1      | 44.2    |
| Candidate-087 | Candidates | Cannabinoids        | 1.5       | 1     | 0.015    | =       | 21.0      | 9.2     | 43.7    | 6.5      | 103.3      |            | 2      | 1436.4  |
| Candidate-088 | Candidates | Dopaminergic GPCR   | -0.5      | 3     | 0.287    | =       | 15.5      | 4.2     | 27.0    | 3.0      | 53.2       |            | 2      | 54.2    |
| Candidate-089 | Candidates | Enzyme              | 3.0       | 16    | 0.933    | <       | 15.4      | 6.9     | 44.9    | 4.0      | 32.6       |            | 3      | 16.5    |
| Candidate-090 | Candidates | Glutamate receptors | 1.5       | 16    | 0.953    | <       | 14.6      | 3.9     | 27.1    | 0.9      | 16.5       | 12.6       | 18     | 15.3    |
| Candidate-091 | Candidates | Gaba Receptors      | 0.9       | 3     | 0.431    | =       | 28.3      | 5.8     | 20.5    | 2.6      | 35.5       | 21.0       | 5      | 65.5    |
| Candidate-092 | Candidates | Reuptake Inhibitors | 1.9       | 6     | 0.417    | <       | 10.6      | 5.7     | 53.9    | 3.3      | 24.7       |            | 3      | 25.4    |
| Candidate-093 | Candidates | Muscarinic Receptor | 0.7       | 3     | 0.880    | =       | 74.2      | 0.2     | 0.3     | 0.2      | 76.2       | 72.1       | 2      | 84.2    |
| Candidate-094 | Candidates | Dopaminergic GPCR   | 2.4       | 7     | 0.231    | =       | 91.4      | 9.8     | 10.7    | 5.6      | 115.6      | 67.2       | 3      | 395.4   |
| Candidate-095 | Candidates | Gaba Receptors      | 0.9       | 2     | 0.709    | =       | 93.4      |         |         |          | 93.4       | 93.4       | 1      | 131.7   |
| Candidate-096 | Candidates | Serotonergic GPCR   |           |       | 0.577    |         |           |         |         |          |            |            |        |         |
| Candidate-097 | Candidates | Reuptake Inhibitors | 2.0       | 3     | 0.150    | =       | 86.9      | 32.8    | 37.7    | 12.4     | 116.6      | 57.1       | 7      | 579.1   |
| Candidate-098 | Candidates | Enzyme              | 2.1       | 4     | 0.033    | <       | 43.3      | 33.5    | 77.3    | 13.7     | 78.8       | 7.8        | 6      | 1324.3  |
| Candidate-099 | Candidates | Peptide GPCR        | 7.7       | 15    | 0.330    | =       | 35.5      | 12.0    | 33.8    | 6.9      | 65.3       | 5.7        | 3      | 107.5   |
| Candidate-100 | Candidates | Enzyme              |           | 0     | 0.003    | =       | 30.3      | 3.6     | 11.8    | 2.5      | 62.2       |            | 2      | 8901.6  |
| Candidate-101 | Candidates | Dopaminergic GPCR   | -6.8      | 2     | 0.143    | <       | 59.5      | 73.4    | 123.4   | 51.9     | 718.5      |            | 2      | 414.6   |
| Candidate-102 | Candidates | Serotonergic GPCR   | 1.4       | 8     | 0.375    | =       | 246.1     | 60.9    | 24.7    | 35.1     | 397.2      | 94.9       | 3      | 656.3   |
| Candidate-103 | Candidates | Dopaminergic GPCR   |           | 0     | 0.012    |         |           |         |         |          |            |            | 0      |         |

| Pub-Name      | Set        | Target Mechanism   | Pgp Low95 | Pgp N | cFu,mi<br>c | CLIA<br>OP | CLIA<br>Mean | CLIA<br>SD | CLIA<br>CV | CLIA<br>SEM | CLIA<br>Upp95 | CLIA<br>Low95 | CLIA N | CLI_u  |
|---------------|------------|--------------------|-----------|-------|-------------|------------|--------------|------------|------------|-------------|---------------|---------------|--------|--------|
| Candidate-104 | Candidates | Peptide GPCR       | 4.1       | 3     | 0.745       | =          | 37.5         | 8.3        | 22.2       | 4.2         | 50.8          | 24.2          | 4      | 50.3   |
| Candidate-105 | Candidates | Gaba Receptors     | 1.0       | 3     | 0.410       | =          | 122.0        | 10.9       | 8.9        | 6.3         | 149.0         | 95.0          | 3      | 297.4  |
| Candidate-106 | Candidates | Peptide GPCR       | -14.9     | 2     | 0.168       | >          | 302.4        |            |            |             | 302.4         | 302.4         | 2      | 1796.8 |
| Candidate-107 | Candidates | Calcium Channels   |           | 0     | 0.981       |            |              |            |            |             |               |               | 0      |        |
| Candidate-108 | Candidates | Nicotinic Receptor | 0.9       | 4     | 0.981       | <          | 9.9          | 1.7        | 17.0       | 0.8         | 12.7          | 7.2           | 4      | 10.1   |

| Pub-Name           | Set   | Target Mechanism    | 2D6 Inh<br>(% @<br>3uM) OP | 2D6 Inh<br>(% @<br>3uM)<br>Mean | 2D6 Inh<br>(% @<br>3uM) SD | 2D6 Inh<br>(% @<br>3uM) CV | 2D6 Inh<br>(% @<br>3uM) SEM | 2D6 Inh<br>(% @<br>3uM)<br>Upp95 | 2D6 Inh<br>(% @<br>3uM)<br>Low95 | 2D6 Inh<br>(% @<br>3uM) N | 3A4 Inh<br>(% @<br>3uM) OP | 3A4 Inh<br>(% @<br>3uM)<br>Mean |
|--------------------|-------|---------------------|----------------------------|---------------------------------|----------------------------|----------------------------|-----------------------------|----------------------------------|----------------------------------|---------------------------|----------------------------|---------------------------------|
| Acamprosate        | Drugs | Glutamate receptors | =                          | 2.2                             | 2.8                        | 130.0                      | 1.4                         | 6.6                              | -2.3                             | 4                         | =                          | 1.6                             |
| Alprazolam         | Drugs | Gaba Receptors      | =                          | 8.0                             | 0.0                        | 0.0                        | 0.0                         | 8.0                              | 8.0                              | 1                         | =                          | 6.0                             |
| Amfebutamone       | Drugs | Dopaminergic GPCR   | =                          | 4.4                             | 5.3                        | 120.9                      | 2.7                         | 12.9                             | -4.1                             | 4                         | =                          | 0.2                             |
| Amisulpride        | Drugs | Dopaminergic GPCR   | =                          | 9.5                             | 8.2                        | 87.1                       | 4.8                         | 29.9                             | -11.0                            | 3                         | =                          | 0.9                             |
| Amphetamine        | Drugs | Reuptake Inhibitors |                            |                                 |                            |                            |                             |                                  |                                  |                           |                            |                                 |
| Aniracetam         | Drugs |                     | =                          | 0.0                             | 0.0                        | 0.0                        | 0.0                         | 0.0                              | 0.0                              | 2                         | =                          | 3.2                             |
| Apomorphine        | Drugs | Dopaminergic GPCR   | =                          | 2.0                             | 3.4                        | 167.7                      | 1.3                         | 5.1                              | -1.1                             | 7                         | =                          | 5.0                             |
| Aprepitant         | Drugs |                     | =                          | 4.6                             | 4.6                        | 99.1                       | 1.9                         | 9.4                              | -0.2                             | 6                         | =                          | 39.0                            |
| Aripiprazole       | Drugs | Dopaminergic GPCR   | =                          | 14.8                            | 10.4                       | 70.2                       | 3.9                         | 24.3                             | 5.4                              | 7                         | =                          | 0.0                             |
| Atomoxetine        | Drugs | Reuptake Inhibitors | =                          | 32.2                            | 30.7                       | 95.2                       | 17.7                        | 108.3                            | -43.9                            | 3                         | =                          | 2.3                             |
| Bromazepam         | Drugs | Gaba Receptors      | =                          | 0.0                             | 0.0                        | 0.0                        | 0.0                         | 0.0                              | 0.0                              | 1                         | =                          | 0.0                             |
| Bromocriptine      | Drugs | Dopaminergic GPCR   | =                          | 5.6                             | 4.8                        | 86.8                       | 2.8                         | 17.6                             | -6.4                             | 3                         | =                          | 84.2                            |
| Brotizolam         | Drugs | Gaba Receptors      | =                          | 0.8                             | 1.1                        | 145.5                      | 0.6                         | 3.5                              | -2.0                             | 3                         | =                          | 3.9                             |
| Budipine           | Drugs | Calcium Channels    |                            |                                 |                            |                            |                             |                                  |                                  |                           |                            |                                 |
| Buprenorphine      | Drugs | Opioid Receptor     |                            |                                 |                            |                            |                             |                                  |                                  |                           |                            |                                 |
| Buspirone          | Drugs | Serotonergic GPCR   | =                          | 12.7                            | 21.0                       | 165.2                      | 8.6                         | 35.0                             | -9.6                             | 6                         | =                          | 6.3                             |
| Cabergoline        | Drugs | Dopaminergic GPCR   | =                          | 7.0                             | 8.0                        | 114.4                      | 3.6                         | 16.9                             | -3.0                             | 5                         | =                          | 2.9                             |
| Caffeine           | Drugs | Serotonergic GPCR   | =                          | 2.3                             | 3.2                        | 141.4                      | 2.3                         | 30.8                             | -26.3                            | 2                         | =                          | 10.3                            |
| Carbamazepine      | Drugs | Reuptake Inhibitors | =                          | 6.7                             | 12.2                       | 181.6                      | 5.0                         | 19.6                             | -6.2                             | 6                         | =                          | 11.4                            |
| Carisoprodol       | Drugs |                     | =                          | 0.0                             | 0.0                        | 0.0                        | 0.0                         | 0.0                              | 0.0                              | 1                         | =                          | 0.0                             |
| Chlorpromazine     | Drugs | Dopaminergic GPCR   | =                          | 62.3                            | 19.8                       | 31.8                       | 9.9                         | 94.1                             | 30.6                             | 4                         | =                          | 12.3                            |
| Citalopram         | Drugs | Serotonergic GPCR   | =                          | 5.4                             | 5.8                        | 107.2                      | 2.9                         | 14.7                             | -3.9                             | 4                         | =                          | 3.8                             |
| Clomipramine       | Drugs | Serotonergic GPCR   | =                          | 19.8                            | 15.4                       | 77.7                       | 6.9                         | 39.1                             | 0.5                              | 5                         | =                          | 10.1                            |
| Clonazepam         | Drugs | Gaba Receptors      | =                          | 0.0                             | 0.0                        | 0.0                        | 0.0                         | 0.0                              | 0.0                              | 1                         | =                          | 0.0                             |
| Clozapine          | Drugs | Serotonergic GPCR   | =                          | 6.7                             | 7.3                        | 108.3                      | 2.4                         | 12.3                             | 1.1                              | 9                         | =                          | 3.6                             |
| Cyclobenzaprine    | Drugs |                     | =                          | 25.5                            | 0.0                        | 0.0                        | 0.0                         | 25.5                             | 25.5                             | 1                         | =                          | 18.5                            |
| Dexmethylphenidate | Drugs | Dopaminergic GPCR   |                            |                                 |                            |                            |                             |                                  |                                  |                           |                            |                                 |
| Dextropropoxyphene | Drugs | Opioid Receptor     | =                          | 2.8                             | 0.0                        | 0.0                        | 0.0                         | 2.8                              | 2.8                              | 1                         | =                          | 36.8                            |
| Diazepam           | Drugs | Gaba Receptors      | =                          | 0.0                             | 0.0                        | 0.0                        | 0.0                         | 0.0                              | 0.0                              | 1                         | =                          | 0.0                             |
| Donepezil          | Drugs | Enzyme              | =                          | 4.7                             | 6.2                        | 133.0                      | 2.8                         | 12.5                             | -3.1                             | 5                         | =                          | 3.3                             |
| Dronabinol         | Drugs | Cannabinoids        |                            |                                 |                            |                            |                             |                                  |                                  |                           |                            |                                 |
| Duloxetine         | Drugs | Serotonergic GPCR   | =                          | 55.7                            | 21.9                       | 39.3                       | 9.8                         | 83.2                             | 28.3                             | 5                         | =                          | 12.0                            |
| Eletriptan         | Drugs | Serotonergic GPCR   | =                          | 20.9                            | 16.7                       | 80.1                       | 7.5                         | 41.8                             | -0.1                             | 5                         | =                          | 16.6                            |
| Escitalopram       | Drugs | Serotonergic GPCR   | =                          | 8.9                             | 7.0                        | 78.0                       | 3.5                         | 20.1                             | -2.2                             | 4                         | =                          | 1.3                             |
| Eszopiclone        | Drugs | Gaba Receptors      |                            |                                 |                            |                            |                             |                                  |                                  |                           |                            |                                 |
| Ethosuximide       | Drugs | Calcium Channels    | =                          | 1.6                             | 3.6                        | 223.6                      | 1.6                         | 6.1                              | -2.9                             | 5                         | =                          | 6.5                             |
| Felbamate          | Drugs | Gaba Receptors      | =                          | 3.9                             | 6.7                        | 173.2                      | 3.9                         | 20.4                             | -12.7                            | 3                         | =                          | 5.7                             |

| Pub-Name             | Set   | Target Mechanism    | 2D6 Inh<br>(% @<br>3uM) OP | 2D6 Inh<br>(% @<br>3uM)<br>Mean | 2D6 Inh<br>(% @<br>3uM) SD | 2D6 Inh<br>(% @<br>3uM) CV | 2D6 Inh<br>(% @<br>3uM) SEM | 2D6 Inh<br>(% @<br>3uM)<br>Upp95 | 2D6 Inh<br>(% @<br>3uM)<br>Low95 | 2D6 Inh<br>(% @<br>3uM) N | 3A4 Inh<br>(% @<br>3uM) OP | 3A4 Inh<br>(% @<br>3uM)<br>Mean |
|----------------------|-------|---------------------|----------------------------|---------------------------------|----------------------------|----------------------------|-----------------------------|----------------------------------|----------------------------------|---------------------------|----------------------------|---------------------------------|
| Fentanyl             | Drugs | Opioid Receptor     | =                          | 0.8                             | 1.5                        | 200.0                      | 0.8                         | 3.2                              | -1.7                             | 4                         | =                          | 5.8                             |
| Flumazenil           | Drugs | Gaba Receptors      | =                          | 76.0                            | 6.7                        | 8.8                        | 2.1                         | 80.4                             | 71.6                             | 10                        | =                          | -0.9                            |
| Fluoxetine           | Drugs | Serotonergic GPCR   | =                          | 17.8                            | 8.9                        | 49.8                       | 3.6                         | 27.2                             | 8.4                              | 6                         | =                          | 1.6                             |
| Fluvoxamine          | Drugs | Serotonergic GPCR   | =                          | 3.6                             | 6.5                        | 180.1                      | 2.3                         | 9.1                              | -1.9                             | 8                         | =                          | 5.3                             |
| Gabapentin           | Drugs | Calcium Channels    | =                          | 5.1                             | 0.5                        | 10.4                       | 0.4                         | 9.9                              | 0.3                              | 2                         | =                          | 23.2                            |
| Galantamine          | Drugs | Enzyme              | =                          | 17.8                            | 3.9                        | 21.9                       | 2.8                         | 52.7                             | -17.2                            | 2                         | =                          | 0.0                             |
| Haloperidol          | Drugs | Dopaminergic GPCR   | =                          | 0.0                             | 0.0                        | 0.0                        | 0.0                         | 0.0                              | 0.0                              | 1                         | =                          | 0.0                             |
| Hydrocodone          | Drugs | Opioid Receptor     | =                          | 1.9                             | 2.7                        | 141.4                      | 1.9                         | 26.2                             | -22.4                            | 2                         | =                          | 1.8                             |
| Indeloxazine         | Drugs | Reuptake Inhibitors | =                          | 0.0                             | 0.0                        | 0.0                        | 0.0                         | 0.0                              | 0.0                              | 6                         | =                          | 2.7                             |
| Lamotrigine          | Drugs | Reuptake Inhibitors | =                          | 1.4                             | 1.6                        | 112.3                      | 0.7                         | 3.3                              | -0.6                             | 5                         | =                          | 0.9                             |
| Levetiracetam        | Drugs | Calcium Channels    | =                          | 47.9                            | 10.4                       | 21.8                       | 7.4                         | 141.6                            | -45.8                            | 2                         | =                          | 0.4                             |
| Levomethadyl Acetate | Drugs | Opioid Receptor     | =                          | 0.0                             | 0.0                        | 0.0                        | 0.0                         | 0.0                              | 0.0                              | 2                         | =                          | 0.0                             |
| Lofexidine           | Drugs | Gaba Receptors      | =                          | 0.2                             | 0.3                        | 141.4                      | 0.2                         | 3.4                              | -2.9                             | 2                         | =                          | 0.0                             |
| Lorazepam            | Drugs | Dopaminergic GPCR   | =                          | 0.1                             | 12.1                       | 13284.6                    | 1.8                         | 3.9                              | -3.7                             | 44                        | =                          | -53.7                           |
| Meprobamate          | Drugs | Gaba Receptors      | =                          | 0.1                             | 12.1                       | 13284.6                    | 1.8                         | 3.9                              | -3.7                             | 44                        | =                          | -53.7                           |
| Methylphenidate      | Drugs | Dopaminergic GPCR   | =                          | 0.2                             | 0.3                        | 141.4                      | 0.2                         | 3.4                              | -2.9                             | 2                         | =                          | 0.0                             |
| Metoclopramide       | Drugs | Dopaminergic GPCR   | =                          | 0.2                             | 0.3                        | 141.4                      | 0.2                         | 3.4                              | -2.9                             | 2                         | =                          | 0.0                             |
| Midazolam            | Drugs | Gaba Receptors      | =                          | 0.1                             | 12.1                       | 13284.6                    | 1.8                         | 3.9                              | -3.7                             | 44                        | =                          | -53.7                           |
| Milnacipran          | Drugs | Serotonergic GPCR   | =                          | 17.7                            | 13.2                       | 74.3                       | 9.3                         | 136.2                            | -100.7                           | 2                         | =                          | 3.2                             |
| Minaprine            | Drugs | Enzyme              | =                          | 3.1                             | 3.7                        | 117.4                      | 1.6                         | 7.7                              | -1.5                             | 5                         | =                          | 0.5                             |
| Mirtazapine          | Drugs | Enzyme              | =                          | 7.9                             | 10.2                       | 129.7                      | 5.9                         | 33.2                             | -17.4                            | 3                         | =                          | 6.2                             |
| Moclobemide          | Drugs | Enzyme              | =                          | 7.9                             | 10.2                       | 129.7                      | 5.9                         | 33.2                             | -17.4                            | 3                         | =                          | 6.2                             |
| Modafinil            | Drugs | Dopaminergic GPCR   | =                          | 0.0                             | 0.0                        | 0.0                        | 0.0                         | 0.0                              | 0.0                              | 1                         | =                          | 0.0                             |
| Morphine             | Drugs | Opioid Receptor     | =                          | 0.0                             | 0.0                        | 0.0                        | 0.0                         | 0.0                              | 0.0                              | 1                         | =                          | 0.0                             |
| Nalmefene            | Drugs | Opioid Receptor     | =                          | 21.5                            | 6.8                        | 31.5                       | 4.8                         | 82.2                             | -39.3                            | 2                         | =                          | 0.4                             |
| Naltrexone           | Drugs | Opioid Receptor     | =                          | 6.2                             | 6.4                        | 103.5                      | 2.6                         | 13.0                             | -0.6                             | 6                         | =                          | 1.4                             |
| Nemonapride          | Drugs | Dopaminergic GPCR   | =                          | 73.6                            | 6.4                        | 8.7                        | 3.7                         | 89.5                             | 57.7                             | 3                         | =                          | 13.3                            |
| Nicergoline          | Drugs | Dopaminergic GPCR   | =                          | 73.6                            | 6.4                        | 8.7                        | 3.7                         | 89.5                             | 57.7                             | 3                         | =                          | 13.3                            |
| Nicotrol             | Drugs | Nicotinic Receptor  | =                          | 2.9                             | 3.3                        | 112.9                      | 1.5                         | 7.1                              | -1.2                             | 5                         | =                          | 3.6                             |
| Nimodipine           | Drugs | Calcium Channels    | =                          | 4.2                             | 3.8                        | 91.7                       | 1.5                         | 7.7                              | 0.7                              | 7                         | =                          | 30.8                            |
| Nortriptyline        | Drugs | Calcium Channels    | =                          | 30.9                            | 0.0                        | 0.0                        | 0.0                         | 30.9                             | 30.9                             | 1                         | =                          | 0.0                             |
| Olanzapine           | Drugs | Dopaminergic GPCR   | =                          | 10.7                            | 6.9                        | 64.9                       | 2.8                         | 18.0                             | 3.3                              | 6                         | =                          | 6.5                             |
| Oxcarbazepine        | Drugs | Reuptake Inhibitors | =                          | 0.0                             | 0.0                        | 0.0                        | 0.0                         | 0.0                              | 0.0                              | 2                         | =                          | 6.8                             |
| Oxycodone            | Drugs | Opioid Receptor     | =                          | 0.0                             | 0.0                        | 0.0                        | 0.0                         | 0.0                              | 0.0                              | 1                         | =                          | 0.0                             |
| Paliperidone         | Drugs | Opioid Receptor     | =                          | 0.0                             | 0.0                        | 0.0                        | 0.0                         | 0.0                              | 0.0                              | 1                         | =                          | 0.0                             |
| Paliperidone         | Drugs | Dopaminergic GPCR   | =                          | 0.0                             | 0.0                        | 0.0                        | 0.0                         | 0.0                              | 0.0                              | 2                         | =                          | 0.0                             |
| Paroxetine           | Drugs | Serotonergic GPCR   | =                          | 70.1                            | 6.4                        | 9.1                        | 3.2                         | 80.4                             | 59.9                             | 4                         | =                          | 4.7                             |
| Pergolide            | Drugs | Dopaminergic GPCR   | =                          | 94.7                            | 1.3                        | 1.4                        | 0.8                         | 97.9                             | 91.5                             | 3                         | =                          | 2.4                             |

| Pub-Name      | Set   | Target Mechanism    | 2D6 Inh<br>(% @<br>3uM) OP | 2D6 Inh<br>(% @<br>3uM)<br>Mean | 2D6 Inh<br>(% @<br>3uM) SD | 2D6 Inh<br>(% @<br>3uM) CV | 2D6 Inh<br>(% @<br>3uM) SEM | 2D6 Inh<br>(% @<br>3uM)<br>Upp95 | 2D6 Inh<br>(% @<br>3uM)<br>Low95 | 2D6 Inh<br>(% @<br>3uM) N | 3A4 Inh<br>(% @<br>3uM) OP | 3A4 Inh<br>(% @<br>3uM)<br>Mean |
|---------------|-------|---------------------|----------------------------|---------------------------------|----------------------------|----------------------------|-----------------------------|----------------------------------|----------------------------------|---------------------------|----------------------------|---------------------------------|
| Perospirone   | Drugs | Dopaminergic GPCR   | =                          | 9.8                             | 3.5                        | 35.7                       | 2.5                         | 41.0                             | -21.5                            | 2                         | =                          | 32.5                            |
| phenytoin     | Drugs | Reuptake Inhibitors | =                          | 4.1                             | 5.2                        | 126.1                      | 1.7                         | 8.1                              | 0.1                              | 9                         | =                          | 6.8                             |
| Piracetam     | Drugs |                     | =                          | 0.0                             | 0.0                        | 141.4                      | 0.0                         | 0.1                              | -0.1                             | 2                         | =                          | 0.5                             |
| Pramipexole   | Drugs | Dopaminergic GPCR   | =                          | 0.0                             | 0.0                        | 0.0                        | 0.0                         | 0.0                              | 0.0                              | 4                         | =                          | 0.0                             |
| Pregabalin    | Drugs | Calcium Channels    | =                          | 1.0                             | 1.4                        | 141.4                      | 1.0                         | 13.6                             | -11.6                            | 2                         | =                          | 1.7                             |
| Propofol      | Drugs |                     | =                          | 0.7                             | 0.9                        | 133.6                      | 0.5                         | 2.2                              | -0.8                             | 4                         | =                          | 1.4                             |
| Propoxyphene  | Drugs |                     |                            |                                 |                            |                            |                             |                                  |                                  |                           |                            |                                 |
| Quazepam      | Drugs | Gaba Receptors      |                            |                                 |                            |                            |                             |                                  |                                  |                           |                            |                                 |
| Quetiapine    | Drugs | Serotonergic GPCR   | =                          | 0.8                             | 1.8                        | 223.6                      | 0.8                         | 3.0                              | -1.4                             | 5                         | =                          | 5.8                             |
| Ramelteon     | Drugs | Melatonin Receptor  | =                          | 0.7                             | 1.5                        | 223.6                      | 0.7                         | 2.5                              | -1.2                             | 5                         | =                          | 2.8                             |
| Rasagiline    | Drugs | Enzyme              | =                          | 5.3                             | 0.0                        | 0.0                        | 0.0                         | 5.3                              | 5.3                              | 1                         | =                          | 2.7                             |
| Reboxetine    | Drugs | Reuptake Inhibitors | =                          | 21.8                            | 12.4                       | 57.1                       | 7.2                         | 52.7                             | -9.1                             | 3                         | =                          | 7.1                             |
| Remifentanyl  | Drugs | Opioid Receptor     |                            |                                 |                            |                            |                             |                                  |                                  |                           |                            |                                 |
| Riluzole      | Drugs | Reuptake Inhibitors | =                          | 1.4                             | 1.6                        | 117.8                      | 0.8                         | 4.0                              | -1.2                             | 4                         | =                          | 0.9                             |
| Rimonabant    | Drugs | Cannabinoids        | =                          | 1.4                             | 2.4                        | 173.2                      | 1.4                         | 7.2                              | -4.5                             | 3                         | =                          | 0.0                             |
| Risperidone   | Drugs | Dopaminergic GPCR   | =                          | 17.3                            | 11.4                       | 65.9                       | 3.8                         | 26.1                             | 8.6                              | 9                         | =                          | 11.5                            |
| Rivastigmine  | Drugs | Enzyme              | =                          | 0.8                             | 1.3                        | 170.5                      | 0.7                         | 2.9                              | -1.3                             | 4                         | =                          | 2.8                             |
| Ropinirole    | Drugs | Dopaminergic GPCR   | =                          | 13.7                            | 7.3                        | 53.2                       | 3.7                         | 25.4                             | 2.0                              | 4                         | =                          | 0.6                             |
| Ropivacaine   | Drugs |                     | =                          | 18.7                            | 5.1                        | 27.5                       | 2.6                         | 27.0                             | 10.5                             | 4                         | =                          | 2.5                             |
| Selegiline    | Drugs | Enzyme              |                            |                                 |                            |                            |                             |                                  |                                  |                           |                            |                                 |
| Sertindole    | Drugs | Serotonergic GPCR   | =                          | 60.7                            | 12.9                       | 21.3                       | 9.1                         | 176.7                            | -55.3                            | 2                         | =                          | 5.2                             |
| Sertraline    | Drugs | Serotonergic GPCR   | =                          | 33.4                            | 18.4                       | 55.1                       | 6.5                         | 49.1                             | 17.8                             | 8                         | =                          | 10.3                            |
| Sinequan      | Drugs | Serotonergic GPCR   | =                          | 31.8                            | 19.4                       | 61.1                       | 9.7                         | 62.8                             | 0.7                              | 4                         | =                          | 5.1                             |
| Sulpiride     | Drugs | Dopaminergic GPCR   | =                          | 0.0                             | 0.0                        | 0.0                        | 0.0                         | 0.0                              | 0.0                              | 1                         | =                          | 1.0                             |
| Tacrine       | Drugs | Enzyme              | =                          | 9.7                             | 5.9                        | 61.0                       | 2.1                         | 14.8                             | 4.7                              | 8                         | =                          | 2.7                             |
| Talipexole    | Drugs | Dopaminergic GPCR   | =                          | 1.9                             | 3.7                        | 200.0                      | 1.9                         | 7.8                              | -4.1                             | 4                         | =                          | 4.0                             |
| Terguride     | Drugs | Dopaminergic GPCR   |                            |                                 |                            |                            |                             |                                  |                                  |                           |                            |                                 |
| Thiopental    | Drugs | Gaba Receptors      |                            |                                 |                            |                            |                             |                                  |                                  |                           |                            |                                 |
| Tiagabine     | Drugs | Gaba Receptors      | =                          | 0.2                             | 0.4                        | 200.0                      | 0.2                         | 0.9                              | -0.5                             | 4                         | =                          | 4.3                             |
| Tianeptine    | Drugs | Reuptake Inhibitors | =                          | 0.0                             | 0.1                        | 173.2                      | 0.0                         | 0.2                              | -0.1                             | 3                         | =                          | 0.0                             |
| Topiramate    | Drugs | Enzyme              | =                          | 0.9                             | 1.5                        | 173.2                      | 0.9                         | 4.6                              | -2.9                             | 3                         | =                          | 0.0                             |
| Tramadol      | Drugs | Reuptake Inhibitors | =                          | 15.0                            | 2.5                        | 16.8                       | 1.8                         | 37.5                             | -7.6                             | 2                         | =                          | 4.8                             |
| Trazodone     | Drugs | Serotonergic GPCR   |                            |                                 |                            |                            |                             |                                  |                                  |                           |                            |                                 |
| Tropisetron   | Drugs | Serotonergic GPCR   | =                          | 26.2                            | 5.8                        | 22.0                       | 4.1                         | 77.9                             | -25.5                            | 2                         | =                          | 7.0                             |
| Valproic Acid | Drugs |                     | =                          | 1.3                             | 2.3                        | 173.2                      | 1.3                         | 7.1                              | -4.4                             | 3                         | =                          | 0.0                             |
| Varenicline   | Drugs | Nicotinic Receptor  | =                          | 5.5                             | 10.9                       | 199.3                      | 4.4                         | 17.0                             | -6.1                             | 6                         | =                          | 5.3                             |
| Venlafaxine   | Drugs | Serotonergic GPCR   | =                          | 9.3                             | 7.8                        | 84.4                       | 3.2                         | 17.5                             | 1.0                              | 6                         | =                          | 4.3                             |



| Pub-Name      | Set        | Target Mechanism    | 2D6 Inh<br>(% @<br>3uM) OP | 2D6 Inh<br>(% @<br>3uM)<br>Mean | 2D6 Inh<br>(% @<br>3uM) SD | 2D6 Inh<br>(% @<br>3uM) CV | 2D6 Inh<br>(% @<br>3uM) SEM | 2D6 Inh<br>(% @<br>3uM)<br>Upp95 | 2D6 Inh<br>(% @<br>3uM)<br>Low95 | 2D6 Inh<br>(% @<br>3uM) N | 3A4 Inh<br>(% @<br>3uM) OP | 3A4 Inh<br>(% @<br>3uM)<br>Mean |
|---------------|------------|---------------------|----------------------------|---------------------------------|----------------------------|----------------------------|-----------------------------|----------------------------------|----------------------------------|---------------------------|----------------------------|---------------------------------|
| Verapamil     | Drugs      | Calcium Channels    | =                          | 4.6                             | 12.1                       | 264.1                      | 2.0                         | 8.8                              | 0.3                              | 36                        | =                          | 19.1                            |
| Vigabatrin    | Drugs      | Gaba Receptors      | =                          | 2.1                             | 0.4                        | 18.0                       | 0.3                         | 5.6                              | -1.3                             | 2                         | =                          | 0.0                             |
| Vinpocetine   | Drugs      |                     | =                          | 4.4                             | 4.1                        | 93.0                       | 2.0                         | 10.8                             | -2.1                             | 4                         | =                          | 5.0                             |
| Zaleplon      | Drugs      | Gaba Receptors      | =                          | 0.0                             | 0.0                        | 0.0                        | 0.0                         | 0.0                              | 0.0                              | 1                         | =                          | 4.0                             |
| Ziprasidone   | Drugs      | Dopaminergic GPCR   | =                          | 5.1                             | 7.0                        | 138.4                      | 2.5                         | 11.0                             | -0.9                             | 8                         | =                          | 17.7                            |
| Zolpidem      | Drugs      | Gaba Receptors      | =                          | 4.1                             | 0.0                        | 0.0                        | 0.0                         | 4.1                              | 4.1                              | 1                         | =                          | 6.1                             |
| Zonisamide    | Drugs      | Enzyme              | =                          | 0.7                             | 1.7                        | 236.0                      | 0.7                         | 2.6                              | -1.1                             | 6                         | =                          | 1.9                             |
| Zotepine      | Drugs      | Serotonergic GPCR   | =                          | 40.5                            | 11.5                       | 28.4                       | 6.6                         | 69.1                             | 11.9                             | 3                         | =                          | 9.3                             |
| Candidate-001 | Candidates | Glutamate receptors | =                          | 13.6                            | 0.0                        | 0.0                        | 0.0                         | 13.6                             | 13.6                             | 1                         | =                          | 10.4                            |
| Candidate-002 | Candidates | Reuptake Inhibitors | =                          | 4.6                             | 3.7                        | 81.6                       | 1.7                         | 9.2                              | -0.1                             | 5                         | =                          | 3.2                             |
| Candidate-003 | Candidates | Reuptake Inhibitors | =                          | 92.0                            | 1.8                        | 2.0                        | 1.0                         | 96.5                             | 87.5                             | 3                         | =                          | 5.5                             |
| Candidate-004 | Candidates | Serotonergic GPCR   |                            |                                 |                            |                            |                             |                                  |                                  |                           |                            |                                 |
| Candidate-005 | Candidates | Enzyme              | =                          | 18.6                            | 0.0                        | 0.0                        | 0.0                         | 18.6                             | 18.6                             | 1                         | =                          | 1.3                             |
| Candidate-006 | Candidates | Peptide GPCR        |                            |                                 |                            |                            |                             |                                  |                                  |                           |                            |                                 |
| Candidate-007 | Candidates | Enzyme              | =                          | 1.0                             | 1.3                        | 128.1                      | 0.6                         | 3.1                              | -1.1                             | 4                         | =                          | 1.9                             |
| Candidate-008 | Candidates | Calcium Channels    | =                          | 0.0                             | 0.0                        | 0.0                        | 0.0                         | 0.0                              | 0.0                              | 1                         | =                          | 0.0                             |
| Candidate-009 | Candidates | Nicotinic Receptor  | =                          | 3.9                             | 5.8                        | 151.5                      | 2.4                         | 10.1                             | -2.3                             | 6                         | =                          | 1.4                             |
| Candidate-010 | Candidates | Opioid Receptor     | =                          | 12.3                            | 7.5                        | 61.1                       | 5.3                         | 80.0                             | -55.4                            | 2                         | =                          | 3.0                             |
| Candidate-011 | Candidates | Dopaminergic GPCR   | =                          | 7.6                             | 11.1                       | 145.7                      | 6.4                         | 35.1                             | -19.9                            | 3                         | =                          | 4.6                             |
| Candidate-012 | Candidates | Peptide GPCR        | =                          | 4.6                             | 6.5                        | 141.4                      | 4.6                         | 62.9                             | -53.7                            | 2                         | =                          | 4.2                             |
| Candidate-013 | Candidates | Enzyme              | =                          | 22.9                            | 0.0                        | 0.0                        | 0.0                         | 22.9                             | 22.9                             | 1                         | =                          | 0.0                             |
| Candidate-014 | Candidates | Opioid Receptor     | =                          | 88.0                            | 0.0                        | 0.0                        | 0.0                         | 88.0                             | 88.0                             | 1                         | =                          | 16.7                            |
| Candidate-015 | Candidates | Nicotinic Receptor  | =                          | 4.4                             | 4.8                        | 109.0                      | 2.8                         | 16.3                             | -7.5                             | 3                         | =                          | 4.7                             |
| Candidate-016 | Candidates | Gaba Receptors      | =                          | 26.2                            | 10.7                       | 40.8                       | 3.6                         | 34.4                             | 18.0                             | 9                         | =                          | 11.9                            |
| Candidate-017 | Candidates | Enzyme              | =                          | 0.0                             | 0.0                        | 0.0                        | 0.0                         | 0.0                              | 0.0                              | 1                         | =                          | 0.0                             |
| Candidate-018 | Candidates | Cannabinoids        | =                          | 2.3                             | 3.5                        | 155.2                      | 1.4                         | 6.0                              | -1.5                             | 6                         | =                          | 1.0                             |
| Candidate-019 | Candidates | Peptide GPCR        | =                          | 8.5                             | 7.8                        | 91.9                       | 3.0                         | 15.6                             | 1.4                              | 7                         | =                          | 15.0                            |
| Candidate-020 | Candidates | Glutamate receptors | =                          | 1.6                             | 0.0                        | 0.0                        | 0.0                         | 1.6                              | 1.6                              | 1                         | =                          | 0.0                             |
| Candidate-021 | Candidates | Enzyme              | =                          | 2.9                             | 3.7                        | 124.9                      | 1.8                         | 8.8                              | -2.9                             | 4                         | =                          | 0.6                             |
| Candidate-022 | Candidates | Enzyme              | =                          | 4.2                             | 3.3                        | 78.1                       | 1.7                         | 9.5                              | -1.1                             | 4                         | =                          | 25.5                            |
| Candidate-023 | Candidates | Nicotinic Receptor  | =                          | 1.9                             | 3.3                        | 173.2                      | 1.9                         | 10.1                             | -6.3                             | 3                         | =                          | 2.7                             |
| Candidate-024 | Candidates | Calcium Channels    | =                          | 20.0                            | 0.0                        | 0.0                        | 0.0                         | 20.0                             | 20.0                             | 1                         | =                          | 0.0                             |
| Candidate-025 | Candidates | Reuptake Inhibitors | =                          | 87.1                            | 2.4                        | 2.7                        | 1.7                         | 108.5                            | 65.7                             | 2                         | =                          | 0.0                             |
| Candidate-026 | Candidates | Serotonergic GPCR   | =                          | 12.8                            | 5.8                        | 45.3                       | 2.6                         | 20.0                             | 5.5                              | 5                         | =                          | 3.6                             |
| Candidate-027 | Candidates | Serotonergic GPCR   | =                          | 4.6                             | 6.6                        | 141.4                      | 4.6                         | 63.5                             | -54.2                            | 2                         | =                          | 4.9                             |
| Candidate-028 | Candidates | Histaminergic GPCR  | =                          | 0.7                             | 1.7                        | 244.4                      | 0.7                         | 2.5                              | -1.1                             | 6                         | =                          | 13.1                            |
| Candidate-029 | Candidates | Glutamate receptors | =                          | 24.8                            | 0.4                        | 1.4                        | 0.3                         | 27.9                             | 21.6                             | 2                         | =                          | 15.3                            |

| Pub-Name      | Set        | Target Mechanism    | 2D6 Inh<br>(% @<br>3uM) OP | 2D6 Inh<br>(% @<br>3uM)<br>Mean | 2D6 Inh<br>(% @<br>3uM) SD | 2D6 Inh<br>(% @<br>3uM) CV | 2D6 Inh<br>(% @<br>3uM) SEM | 2D6 Inh<br>(% @<br>3uM)<br>Upp95 | 2D6 Inh<br>(% @<br>3uM)<br>Low95 | 2D6 Inh<br>(% @<br>3uM) N | 3A4 Inh<br>(% @<br>3uM) OP | 3A4 Inh<br>(% @<br>3uM)<br>Mean |
|---------------|------------|---------------------|----------------------------|---------------------------------|----------------------------|----------------------------|-----------------------------|----------------------------------|----------------------------------|---------------------------|----------------------------|---------------------------------|
| Candidate-030 | Candidates | Peptide GPCR        | =                          | 79.5                            | 9.2                        | 11.6                       | 6.5                         | 162.3                            | -3.3                             | 2                         | =                          | 13.5                            |
| Candidate-031 | Candidates | Serotonergic GPCR   | =                          | 3.0                             | 4.4                        | 147.2                      | 2.0                         | 8.5                              | -2.5                             | 5                         | =                          | 16.9                            |
| Candidate-032 | Candidates | Gaba Receptors      | =                          | 2.4                             | 3.4                        | 140.1                      | 1.5                         | 6.6                              | -1.8                             | 5                         | =                          | 27.6                            |
| Candidate-033 | Candidates | Opioid Receptor     | =                          | 5.5                             | 5.3                        | 96.4                       | 1.7                         | 9.0                              | 2.0                              | 10                        | =                          | 2.5                             |
| Candidate-034 | Candidates | Reuptake Inhibitors | =                          | 6.8                             | 4.2                        | 61.5                       | 1.4                         | 10.0                             | 3.6                              | 9                         | =                          | 41.2                            |
| Candidate-035 | Candidates | Calcium Channels    | =                          | 33.5                            | 47.4                       | 141.4                      | 33.5                        | 458.7                            | -391.8                           | 2                         | =                          | 1.0                             |
| Candidate-036 | Candidates | Peptide GPCR        | =                          | 0.0                             | 0.0                        | 0.0                        | 0.0                         | 0.0                              | 0.0                              | 1                         | =                          | 10.4                            |
| Candidate-037 | Candidates | Gaba Receptors      | =                          | 0.4                             | 0.8                        | 200.0                      | 0.4                         | 1.7                              | -0.9                             | 4                         | =                          | 0.0                             |
| Candidate-038 | Candidates | Serotonergic GPCR   | =                          | 5.2                             | 0.0                        | 0.0                        | 0.0                         | 5.2                              | 5.2                              | 1                         | =                          | 12.2                            |
| Candidate-039 | Candidates | Glutamate receptors | =                          | 5.4                             | 5.1                        | 93.7                       | 2.9                         | 17.9                             | -7.2                             | 3                         | =                          | 11.9                            |
| Candidate-040 | Candidates | Enzyme              | =                          | 0.0                             | 0.0                        | 0.0                        | 0.0                         | 0.0                              | 0.0                              | 1                         | =                          | 0.0                             |
| Candidate-041 | Candidates | Peptide GPCR        | =                          | 88.8                            | 5.2                        | 5.9                        | 3.0                         | 101.8                            | 75.8                             | 3                         | =                          | 10.1                            |
| Candidate-042 | Candidates | Serotonergic GPCR   | =                          | 37.3                            | 15.6                       | 41.9                       | 5.5                         | 50.6                             | 24.0                             | 8                         | =                          | 3.8                             |
| Candidate-043 | Candidates | Peptide GPCR        | =                          | 2.7                             | 4.7                        | 176.7                      | 1.9                         | 7.6                              | -2.3                             | 6                         | =                          | 4.3                             |
| Candidate-044 | Candidates | Serotonergic GPCR   | =                          | 7.9                             | 7.3                        | 92.9                       | 3.0                         | 15.6                             | 0.1                              | 6                         | =                          | 10.9                            |
| Candidate-045 | Candidates | Cannabinoids        | =                          | 0.0                             | 0.0                        | 0.0                        | 0.0                         | 0.0                              | 0.0                              | 1                         | =                          | 0.0                             |
| Candidate-046 | Candidates | Serotonergic GPCR   | =                          | 10.6                            | 0.0                        | 0.0                        | 0.0                         | 10.6                             | 10.6                             | 1                         | =                          | 2.3                             |
| Candidate-047 | Candidates | Calcium Channels    | =                          | 20.0                            | 28.3                       | 141.4                      | 20.0                        | 274.0                            | -234.0                           | 2                         | =                          | 1.2                             |
| Candidate-048 | Candidates | Dopaminergic GPCR   | =                          | 18.0                            | 8.1                        | 45.2                       | 3.3                         | 26.7                             | 9.4                              | 6                         | =                          | 3.9                             |
| Candidate-049 | Candidates | Serotonergic GPCR   | =                          | 11.5                            | 0.7                        | 6.0                        | 0.5                         | 17.7                             | 5.3                              | 2                         | =                          | 9.4                             |
| Candidate-050 | Candidates | Gaba Receptors      | =                          | 2.6                             | 3.5                        | 134.2                      | 1.7                         | 8.1                              | -3.0                             | 4                         | =                          | 9.6                             |
| Candidate-051 | Candidates | Reuptake Inhibitors | =                          | 6.4                             | 6.7                        | 106.0                      | 2.7                         | 13.5                             | -0.8                             | 6                         | =                          | 2.1                             |
| Candidate-052 | Candidates | Enzyme              | =                          | 14.5                            | 0.0                        | 0.0                        | 0.0                         | 14.5                             | 14.5                             | 1                         | =                          | 12.8                            |
| Candidate-053 | Candidates | Nicotinic Receptor  | =                          | 0.0                             | 0.0                        | 0.0                        | 0.0                         | 0.0                              | 0.0                              | 1                         | =                          | 4.8                             |
| Candidate-054 | Candidates | Opioid Receptor     | =                          | 69.8                            | 0.0                        | 0.0                        | 0.0                         | 69.8                             | 69.8                             | 1                         | =                          | 25.7                            |
| Candidate-055 | Candidates | Enzyme              | =                          | 10.3                            | 7.0                        | 67.7                       | 4.0                         | 27.6                             | -7.0                             | 3                         | =                          | 0.0                             |
| Candidate-056 | Candidates | Enzyme              | =                          | 26.8                            | 22.5                       | 84.1                       | 11.3                        | 62.9                             | -9.3                             | 4                         | =                          | 20.6                            |
| Candidate-057 | Candidates | Dopaminergic GPCR   |                            |                                 |                            |                            |                             |                                  |                                  | 0                         |                            |                                 |
| Candidate-058 | Candidates | Peptide GPCR        |                            |                                 |                            |                            |                             |                                  |                                  |                           |                            |                                 |
| Candidate-059 | Candidates | Dopaminergic GPCR   |                            |                                 |                            |                            |                             |                                  |                                  |                           |                            |                                 |
| Candidate-060 | Candidates | Serotonergic GPCR   | =                          | 4.4                             | 4.3                        | 97.4                       | 1.7                         | 8.9                              | -0.1                             | 6                         | =                          | 12.8                            |
| Candidate-061 | Candidates | Histaminergic GPCR  | =                          | 3.8                             | 6.5                        | 173.2                      | 3.8                         | 19.9                             | -12.4                            | 3                         | =                          | 4.6                             |
| Candidate-062 | Candidates | Dopaminergic GPCR   | =                          | 13.4                            | 6.5                        | 48.4                       | 4.6                         | 71.7                             | -44.9                            | 2                         | =                          | 15.8                            |
| Candidate-063 | Candidates | Nicotinic Receptor  | =                          | 0.5                             | 0.7                        | 141.4                      | 0.5                         | 6.7                              | -5.7                             | 2                         | =                          | 0.0                             |
| Candidate-064 | Candidates | Serotonergic GPCR   | =                          | 5.2                             | 6.4                        | 123.2                      | 3.2                         | 15.4                             | -5.0                             | 4                         | =                          | 0.0                             |
| Candidate-065 | Candidates | Peptide GPCR        | =                          | 3.3                             | 0.4                        | 12.3                       | 0.3                         | 6.9                              | -0.3                             | 2                         | =                          | 13.3                            |
| Candidate-066 | Candidates | Serotonergic GPCR   | =                          | 3.0                             | 5.2                        | 173.2                      | 3.0                         | 15.9                             | -9.9                             | 3                         | =                          | 8.2                             |

| Pub-Name      | Set        | Target Mechanism    | 2D6 Inh<br>(% @<br>3uM) OP | 2D6 Inh<br>(% @<br>3uM)<br>Mean | 2D6 Inh<br>(% @<br>3uM) SD | 2D6 Inh<br>(% @<br>3uM) CV | 2D6 Inh<br>(% @<br>3uM) SEM | 2D6 Inh<br>(% @<br>3uM)<br>Upp95 | 2D6 Inh<br>(% @<br>3uM)<br>Low95 | 2D6 Inh<br>(% @<br>3uM) N | 3A4 Inh<br>(% @<br>3uM) OP | 3A4 Inh<br>(% @<br>3uM)<br>Mean |
|---------------|------------|---------------------|----------------------------|---------------------------------|----------------------------|----------------------------|-----------------------------|----------------------------------|----------------------------------|---------------------------|----------------------------|---------------------------------|
| Candidate-067 | Candidates | Dopaminergic GPCR   | =                          | 39.1                            | 13.1                       | 33.5                       | 6.5                         | 60.1                             | 18.2                             | 4                         | =                          | 17.5                            |
| Candidate-068 | Candidates | Serotonergic GPCR   | =                          | 2.3                             | 3.2                        | 141.4                      | 2.3                         | 31.0                             | -26.5                            | 2                         | =                          | 0.0                             |
| Candidate-069 | Candidates | Reuptake Inhibitors | =                          | 70.6                            | 0.0                        | 0.0                        | 0.0                         | 70.6                             | 70.6                             | 1                         | =                          | 10.5                            |
| Candidate-070 | Candidates | Dopaminergic GPCR   | =                          | 0.0                             | 0.0                        | 0.0                        | 0.0                         | 0.0                              | 0.0                              | 1                         | =                          | 0.0                             |
| Candidate-071 | Candidates | Reuptake Inhibitors | =                          | 36.5                            | 50.9                       | 139.6                      | 36.0                        | 493.6                            | -420.7                           | 2                         | =                          | 0.0                             |
| Candidate-072 | Candidates | Dopaminergic GPCR   | =                          | 54.3                            | 8.9                        | 16.5                       | 5.2                         | 76.4                             | 32.1                             | 3                         | =                          | 0.0                             |
| Candidate-073 | Candidates | Gaba Receptors      | =                          | 2.2                             | 2.2                        | 102.0                      | 0.7                         | 3.9                              | 0.5                              | 9                         | =                          | 2.8                             |
| Candidate-074 | Candidates | Peptide GPCR        | =                          | 0.0                             | 0.0                        | 0.0                        | 0.0                         | 0.0                              | 0.0                              | 1                         | =                          | 0.0                             |
| Candidate-075 | Candidates | Nicotinic Receptor  | =                          | 2.0                             | 2.9                        | 141.4                      | 2.0                         | 27.9                             | -23.9                            | 2                         | =                          | 0.8                             |
| Candidate-076 | Candidates | Nicotinic Receptor  | =                          | 5.6                             | 4.2                        | 73.9                       | 2.1                         | 12.3                             | -1.0                             | 4                         | =                          | 7.8                             |
| Candidate-077 | Candidates | Gaba Receptors      | =                          | 2.8                             | 3.3                        | 117.4                      | 1.6                         | 8.0                              | -2.4                             | 4                         | =                          | 0.4                             |
| Candidate-078 | Candidates | Reuptake Inhibitors | =                          | 11.6                            | 11.9                       | 102.4                      | 4.5                         | 22.4                             | 0.8                              | 7                         | =                          | 8.8                             |
| Candidate-079 | Candidates | Calcium Channels    | =                          | 0.0                             | 0.0                        | 0.0                        | 0.0                         | 0.0                              | 0.0                              | 1                         | =                          | 10.3                            |
| Candidate-080 | Candidates | Dopaminergic GPCR   | =                          | 42.3                            | 0.0                        | 0.0                        | 0.0                         | 42.3                             | 42.3                             | 1                         | =                          | 0.0                             |
| Candidate-081 | Candidates | Serotonergic GPCR   | =                          | 8.4                             | 9.8                        | 116.3                      | 4.9                         | 24.1                             | -7.2                             | 4                         | =                          | 10.2                            |
| Candidate-082 | Candidates | Gaba Receptors      | =                          | 3.0                             | 4.7                        | 154.3                      | 2.1                         | 8.9                              | -2.8                             | 5                         | =                          | 2.3                             |
| Candidate-083 | Candidates | Cannabinoids        | =                          | 2.4                             | 3.4                        | 141.4                      | 2.4                         | 32.9                             | -28.1                            | 2                         | =                          | 0.0                             |
| Candidate-084 | Candidates | Gaba Receptors      | =                          | 5.3                             | 8.2                        | 155.6                      | 2.9                         | 12.3                             | -1.7                             | 8                         | =                          | 7.2                             |
| Candidate-085 | Candidates | Reuptake Inhibitors |                            |                                 |                            |                            |                             |                                  |                                  |                           |                            |                                 |
| Candidate-086 | Candidates | Muscarinic Receptor | =                          | 0.0                             | 0.0                        | 0.0                        | 0.0                         | 0.0                              | 0.0                              | 1                         | =                          | 6.4                             |
| Candidate-087 | Candidates | Cannabinoids        | =                          | 0.0                             | 0.0                        | 0.0                        | 0.0                         | 0.0                              | 0.0                              | 2                         | =                          | 20.3                            |
| Candidate-088 | Candidates | Dopaminergic GPCR   | =                          | 23.9                            | 0.0                        | 0.0                        | 0.0                         | 23.9                             | 23.9                             | 1                         | =                          | 0.0                             |
| Candidate-089 | Candidates | Enzyme              | =                          | 4.2                             | 3.7                        | 89.4                       | 2.1                         | 13.4                             | -5.1                             | 3                         | =                          | 1.2                             |
| Candidate-090 | Candidates | Glutamate receptors | =                          | 15.7                            | 9.3                        | 58.9                       | 4.6                         | 30.6                             | 0.9                              | 4                         | =                          | 18.5                            |
| Candidate-091 | Candidates | Gaba Receptors      | =                          | 1.2                             | 1.7                        | 138.7                      | 0.8                         | 3.9                              | -1.5                             | 4                         | =                          | 1.3                             |
| Candidate-092 | Candidates | Reuptake Inhibitors | =                          | 0.0                             | 0.0                        | 0.0                        | 0.0                         | 0.0                              | 0.0                              | 2                         | =                          | 0.0                             |
| Candidate-093 | Candidates | Muscarinic Receptor | =                          | 17.2                            | 0.0                        | 0.0                        | 0.0                         | 17.2                             | 17.2                             | 1                         | =                          | 0.0                             |
| Candidate-094 | Candidates | Dopaminergic GPCR   | =                          | 9.1                             | 10.0                       | 109.7                      | 5.8                         | 33.9                             | -15.7                            | 3                         | =                          | 10.9                            |
| Candidate-095 | Candidates | Gaba Receptors      | =                          | 4.0                             | 4.7                        | 116.8                      | 2.3                         | 11.5                             | -3.5                             | 4                         | =                          | 1.9                             |
| Candidate-096 | Candidates | Serotonergic GPCR   |                            |                                 |                            |                            |                             |                                  |                                  |                           |                            |                                 |
| Candidate-097 | Candidates | Reuptake Inhibitors | =                          | 93.7                            | 1.7                        | 1.8                        | 0.7                         | 95.4                             | 91.9                             | 6                         | =                          | 2.0                             |
| Candidate-098 | Candidates | Enzyme              | =                          | 9.9                             | 9.8                        | 98.5                       | 4.4                         | 22.1                             | -2.3                             | 5                         | =                          | 13.3                            |
| Candidate-099 | Candidates | Peptide GPCR        | =                          | 56.4                            | 8.6                        | 15.2                       | 6.1                         | 133.4                            | -20.6                            | 2                         | =                          | 5.3                             |
| Candidate-100 | Candidates | Enzyme              | =                          | 0.0                             | 0.0                        | 0.0                        | 0.0                         | 0.0                              | 0.0                              | 1                         | =                          | 0.0                             |
| Candidate-101 | Candidates | Dopaminergic GPCR   | =                          | 0.5                             | 0.9                        | 173.2                      | 0.5                         | 2.8                              | -1.7                             | 3                         | =                          | 6.2                             |
| Candidate-102 | Candidates | Serotonergic GPCR   | =                          | 8.0                             | 4.9                        | 61.0                       | 2.8                         | 20.1                             | -4.1                             | 3                         | =                          | 8.9                             |
| Candidate-103 | Candidates | Dopaminergic GPCR   | =                          | 87.8                            | 0.0                        | 0.0                        | 0.0                         | 87.8                             | 87.8                             | 1                         | =                          | 0.0                             |

| Pub-Name      | Set        | Target Mechanism   | 2D6 Inh<br>(% @<br>3uM) OP | 2D6 Inh<br>(% @<br>3uM)<br>Mean | 2D6 Inh<br>(% @<br>3uM) SD | 2D6 Inh<br>(% @<br>3uM) CV | 2D6 Inh<br>(% @<br>3uM) SEM | 2D6 Inh<br>(% @<br>3uM)<br>Upp95 | 2D6 Inh<br>(% @<br>3uM)<br>Low95 | 2D6 Inh<br>(% @<br>3uM) N | 3A4 Inh<br>(% @<br>3uM) OP | 3A4 Inh<br>(% @<br>3uM)<br>Mean |
|---------------|------------|--------------------|----------------------------|---------------------------------|----------------------------|----------------------------|-----------------------------|----------------------------------|----------------------------------|---------------------------|----------------------------|---------------------------------|
| Candidate-104 | Candidates | Peptide GPCR       | =                          | 19.8                            | 11.1                       | 56.1                       | 6.4                         | 47.4                             | -7.8                             | 3                         | =                          | 16.9                            |
| Candidate-105 | Candidates | Gaba Receptors     | =                          | 2.6                             | 4.6                        | 173.2                      | 2.6                         | 14.0                             | -8.7                             | 3                         | =                          | 0.1                             |
| Candidate-106 | Candidates | Peptide GPCR       | =                          | 20.8                            | 0.0                        | 0.0                        | 0.0                         | 20.8                             | 20.8                             | 1                         | =                          | 64.0                            |
| Candidate-107 | Candidates | Calcium Channels   | =                          | 0.0                             | 0.0                        | 0.0                        | 0.0                         | 0.0                              | 0.0                              | 1                         | =                          | 0.0                             |
| Candidate-108 | Candidates | Nicotinic Receptor | =                          | 4.5                             | 5.3                        | 117.9                      | 2.7                         | 13.1                             | -4.0                             | 4                         | =                          | 26.5                            |

| Pub-Name           | Set   | Target Mechanism    | 3A4 Inh<br>(% @<br>3uM) SD | 3A4 Inh<br>(% @<br>3uM) CV | 3A4 Inh<br>(% @<br>3uM)<br>SEM | 3A4 Inh<br>(% @<br>3uM)<br>Upp95 | 3A4 Inh<br>(% @<br>3uM)<br>Low95 | 3A4 Inh<br>(% @<br>3uM)<br>TotCnt | 3A4 Inh<br>(% @<br>3uM) N | Dof Inh<br>(% @<br>10uM)<br>Mean | Dof Inh<br>(% @<br>10uM) SD | Dof Inh<br>(% @<br>10uM) CV | Dof Inh<br>(% @<br>10uM)<br>SEM |
|--------------------|-------|---------------------|----------------------------|----------------------------|--------------------------------|----------------------------------|----------------------------------|-----------------------------------|---------------------------|----------------------------------|-----------------------------|-----------------------------|---------------------------------|
| Acamprosate        | Drugs | Glutamate receptors | 2.9                        | 176.7                      | 1.5                            | 6.3                              | -3.0                             | 4                                 | 4                         | -2.8                             | 3.7                         | -130.1                      | 0.9                             |
| Alprazolam         | Drugs | Gaba Receptors      | 0.0                        | 0.0                        | 0.0                            | 6.0                              | 6.0                              | 1                                 | 1                         | -5.5                             | 1.2                         | -21.8                       | 0.6                             |
| Amfebutamone       | Drugs | Dopaminergic GPCR   | 0.3                        | 200.0                      | 0.2                            | 0.7                              | -0.4                             | 4                                 | 4                         | -0.9                             | 5.2                         | -606.1                      | 1.6                             |
| Amisulpride        | Drugs | Dopaminergic GPCR   | 1.6                        | 173.2                      | 0.9                            | 4.9                              | -3.0                             | 3                                 | 3                         | 15.2                             | 2.6                         | 17.2                        | 0.8                             |
| Amphetamine        | Drugs | Reuptake Inhibitors |                            |                            |                                |                                  |                                  |                                   |                           |                                  |                             |                             |                                 |
| Aniracetam         | Drugs |                     | 4.5                        | 141.4                      | 3.2                            | 43.2                             | -36.9                            | 2                                 | 2                         | 3.3                              | 6.1                         | 182.2                       | 2.1                             |
| Apomorphine        | Drugs | Dopaminergic GPCR   | 4.9                        | 98.3                       | 1.8                            | 9.4                              | 0.5                              | 7                                 | 7                         | 21.8                             | 7.0                         | 32.0                        | 1.4                             |
| Aprepitant         | Drugs |                     | 24.0                       | 61.6                       | 9.8                            | 64.4                             | 13.5                             | 6                                 | 6                         | 12.1                             | 10.6                        | 87.5                        | 2.8                             |
| Aripiprazole       | Drugs | Dopaminergic GPCR   | 0.0                        | 0.0                        | 0.0                            | 0.0                              | 0.0                              | 7                                 | 7                         | 86.3                             | 7.0                         | 8.1                         | 1.5                             |
| Atomoxetine        | Drugs | Reuptake Inhibitors | 4.0                        | 173.2                      | 2.3                            | 12.3                             | -7.7                             | 4                                 | 3                         | 63.2                             | 12.6                        | 20.0                        | 3.2                             |
| Bromazepam         | Drugs | Gaba Receptors      | 0.0                        | 0.0                        | 0.0                            | 0.0                              | 0.0                              | 1                                 | 1                         | 5.3                              | 7.3                         | 139.6                       | 3.7                             |
| Bromocriptine      | Drugs | Dopaminergic GPCR   | 7.5                        | 8.9                        | 4.3                            | 102.8                            | 65.5                             | 3                                 | 3                         | 19.0                             | 9.2                         | 48.3                        | 2.8                             |
| Brotizolam         | Drugs | Gaba Receptors      | 2.7                        | 68.7                       | 1.5                            | 10.5                             | -2.7                             | 3                                 | 3                         | 2.0                              | 4.9                         | 238.9                       | 1.4                             |
| Budipine           | Drugs | Calcium Channels    |                            |                            |                                |                                  |                                  |                                   |                           |                                  |                             |                             |                                 |
| Buprenorphine      | Drugs | Opioid Receptor     |                            |                            |                                |                                  |                                  |                                   |                           |                                  |                             |                             |                                 |
| Buspirone          | Drugs | Serotonergic GPCR   | 12.3                       | 194.4                      | 5.0                            | 19.4                             | -6.7                             | 6                                 | 6                         | 27.4                             | 7.3                         | 26.7                        | 1.8                             |
| Cabergoline        | Drugs | Dopaminergic GPCR   | 4.7                        | 159.6                      | 2.1                            | 8.7                              | -2.9                             | 5                                 | 5                         | 31.2                             | 14.7                        | 47.3                        | 3.3                             |
| Caffeine           | Drugs | Serotonergic GPCR   | 14.5                       | 141.4                      | 10.3                           | 140.4                            | -119.9                           | 2                                 | 2                         |                                  |                             |                             |                                 |
| Carbamazepine      | Drugs | Reuptake Inhibitors | 15.9                       | 139.2                      | 6.5                            | 28.3                             | -5.4                             | 8                                 | 6                         | -0.3                             | 5.8                         | -2205.2                     | 1.2                             |
| Carisoprodol       | Drugs |                     | 0.0                        | 0.0                        | 0.0                            | 0.0                              | 0.0                              | 1                                 | 1                         | 6.9                              | 3.9                         | 56.1                        | 1.9                             |
| Chlorpromazine     | Drugs | Dopaminergic GPCR   | 6.4                        | 51.7                       | 3.2                            | 22.5                             | 2.1                              | 4                                 | 4                         |                                  |                             |                             |                                 |
| Citalopram         | Drugs | Serotonergic GPCR   | 3.9                        | 102.7                      | 2.2                            | 13.3                             | -5.8                             | 4                                 | 3                         | 41.0                             | 19.5                        | 47.6                        | 5.2                             |
| Clomipramine       | Drugs | Serotonergic GPCR   | 10.0                       | 99.4                       | 4.5                            | 22.6                             | -2.5                             | 5                                 | 5                         | 70.1                             | 15.6                        | 22.2                        | 4.5                             |
| Clonazepam         | Drugs | Gaba Receptors      | 0.0                        | 0.0                        | 0.0                            | 0.0                              | 0.0                              | 1                                 | 1                         | -4.2                             | 1.9                         | -46.3                       | 0.7                             |
| Clozapine          | Drugs | Serotonergic GPCR   | 4.9                        | 136.9                      | 1.6                            | 7.4                              | -0.2                             | 9                                 | 9                         | 49.9                             | 12.0                        | 24.1                        | 2.3                             |
| Cyclobenzaprine    | Drugs |                     | 0.0                        | 0.0                        | 0.0                            | 18.5                             | 18.5                             | 1                                 | 1                         |                                  |                             |                             |                                 |
| Dexmethylphenidate | Drugs | Dopaminergic GPCR   |                            |                            |                                |                                  |                                  |                                   |                           |                                  |                             |                             |                                 |
| Dextropropoxyphene | Drugs | Opioid Receptor     | 0.0                        | 0.0                        | 0.0                            | 36.8                             | 36.8                             | 1                                 | 1                         | 0.7                              | 3.1                         | 429.4                       | 1.6                             |
| Diazepam           | Drugs | Gaba Receptors      | 0.0                        | 0.0                        | 0.0                            | 0.0                              | 0.0                              | 1                                 | 1                         |                                  |                             |                             |                                 |
| Donepezil          | Drugs | Enzyme              | 5.2                        | 158.8                      | 2.3                            | 9.9                              | -3.3                             | 5                                 | 5                         | 72.6                             | 12.8                        | 17.6                        | 3.7                             |
| Dronabinol         | Drugs | Cannabinoids        |                            |                            |                                |                                  |                                  |                                   |                           |                                  |                             |                             |                                 |
| Duloxetine         | Drugs | Serotonergic GPCR   | 11.4                       | 95.1                       | 5.1                            | 26.2                             | -2.3                             | 5                                 | 5                         | 61.6                             | 31.7                        | 51.4                        | 11.2                            |
| Eletriptan         | Drugs | Serotonergic GPCR   | 11.3                       | 68.3                       | 5.1                            | 30.8                             | 2.4                              | 5                                 | 5                         | 53.9                             | 10.0                        | 18.6                        | 2.9                             |
| Escitalopram       | Drugs | Serotonergic GPCR   | 2.6                        | 200.0                      | 1.3                            | 5.5                              | -2.9                             | 4                                 | 4                         | 57.2                             | 7.6                         | 13.2                        | 1.9                             |
| Eszopiclone        | Drugs | Gaba Receptors      |                            |                            |                                |                                  |                                  |                                   |                           |                                  |                             |                             |                                 |
| Ethosuximide       | Drugs | Calcium Channels    | 9.2                        | 141.4                      | 4.1                            | 18.0                             | -5.0                             | 5                                 | 5                         |                                  |                             |                             |                                 |
| Felbamate          | Drugs | Gaba Receptors      | 9.9                        | 173.2                      | 5.7                            | 30.2                             | -18.8                            | 4                                 | 3                         | -2.3                             | 6.1                         | -271.5                      | 1.6                             |

| Pub-Name             | Set   | Target Mechanism    | 3A4 Inh<br>(% @<br>3uM) SD | 3A4 Inh<br>(% @<br>3uM) CV | 3A4 Inh<br>(% @<br>3uM)<br>SEM | 3A4 Inh<br>(% @<br>3uM)<br>Upp95 | 3A4 Inh<br>(% @<br>3uM)<br>Low95 | 3A4 Inh<br>(% @<br>3uM)<br>TotCnt | 3A4 Inh<br>(% @<br>3uM) N | Dof Inh<br>(% @<br>10uM)<br>Mean | Dof Inh<br>(% @<br>10uM) SD | Dof Inh<br>(% @<br>10uM) CV | Dof Inh<br>(% @<br>10uM)<br>SEM |
|----------------------|-------|---------------------|----------------------------|----------------------------|--------------------------------|----------------------------------|----------------------------------|-----------------------------------|---------------------------|----------------------------------|-----------------------------|-----------------------------|---------------------------------|
| Fentanyl             | Drugs | Opioid Receptor     |                            |                            |                                |                                  |                                  |                                   |                           |                                  |                             |                             |                                 |
| Flumazenil           | Drugs | Gaba Receptors      | 11.5                       | 200.0                      | 5.8                            | 24.2                             | -12.7                            | 4                                 | 4                         | 2.7                              | 13.4                        | 505.2                       | 3.9                             |
| Fluoxetine           | Drugs | Serotonergic GPCR   | 7.7                        | -831.9                     | 2.4                            | 4.2                              | -6.1                             | 10                                | 10                        | 58.2                             | 11.5                        | 19.7                        | 2.3                             |
| Fluvoxamine          | Drugs | Serotonergic GPCR   | 1.8                        | 110.7                      | 0.7                            | 3.5                              | -0.3                             | 6                                 | 6                         | 29.4                             | 13.0                        | 44.3                        | 2.7                             |
| Gabapentin           | Drugs | Calcium Channels    | 8.5                        | 160.2                      | 3.0                            | 12.6                             | -1.9                             | 8                                 | 8                         | -0.2                             | 7.7                         | -4216.9                     | 1.7                             |
| Galantamine          | Drugs | Enzyme              | 24.8                       | 106.8                      | 17.6                           | 246.2                            | -199.7                           | 2                                 | 2                         | 2.0                              | 5.3                         | 271.1                       | 1.9                             |
| Haloperidol          | Drugs | Dopaminergic GPCR   | 0.0                        | 0.0                        | 0.0                            | 0.0                              | 0.0                              | 2                                 | 2                         |                                  |                             |                             |                                 |
| Hydrocodone          | Drugs | Opioid Receptor     | 0.0                        | 0.0                        | 0.0                            | 0.0                              | 0.0                              | 1                                 | 1                         | 12.0                             | 3.3                         | 27.8                        | 1.9                             |
| Indeloxazine         | Drugs | Reuptake Inhibitors | 2.6                        | 141.4                      | 1.8                            | 24.9                             | -21.3                            | 2                                 | 2                         | -2.5                             | 5.2                         | -208.4                      | 1.8                             |
| Lamotrigine          | Drugs | Reuptake Inhibitors | 2.4                        | 88.1                       | 0.9                            | 4.9                              | 0.5                              | 7                                 | 7                         | -3.1                             | 3.5                         | -116.0                      | 0.9                             |
| Levetiracetam        | Drugs | Calcium Channels    | 1.0                        | 113.5                      | 0.4                            | 2.1                              | -0.4                             | 5                                 | 5                         | -3.2                             | 6.0                         | -186.7                      | 1.7                             |
| Levomethadyl Acetate | Drugs | Opioid Receptor     |                            |                            |                                |                                  |                                  |                                   |                           |                                  |                             |                             |                                 |
| Lofexidine           | Drugs |                     | 0.5                        | 141.4                      | 0.4                            | 5.0                              | -4.3                             | 2                                 | 2                         | 26.0                             | 8.1                         | 31.3                        | 3.1                             |
| Lorazepam            | Drugs | Gaba Receptors      | 0.0                        | 0.0                        | 0.0                            | 0.0                              | 0.0                              | 2                                 | 2                         | 2.7                              | 7.1                         | 263.5                       | 2.5                             |
| Meprobamate          | Drugs |                     |                            |                            |                                |                                  |                                  |                                   |                           |                                  |                             |                             |                                 |
| Methylphenidate      | Drugs | Dopaminergic GPCR   | 0.0                        | 0.0                        | 0.0                            | 0.0                              | 0.0                              | 2                                 | 2                         | 7.6                              | 8.8                         | 115.2                       | 3.1                             |
| Metoclopramide       | Drugs |                     |                            |                            |                                |                                  |                                  |                                   |                           |                                  |                             |                             |                                 |
| Midazolam            | Drugs | Gaba Receptors      | 34.7                       | -64.6                      | 5.3                            | -42.6                            | -64.8                            | 44                                | 43                        |                                  |                             |                             |                                 |
| Milnacipran          | Drugs | Serotonergic GPCR   |                            |                            |                                |                                  |                                  |                                   |                           |                                  |                             |                             |                                 |
| Minaprine            | Drugs | Enzyme              | 2.2                        | 67.8                       | 1.5                            | 22.5                             | -16.2                            | 2                                 | 2                         | 13.4                             | 11.0                        | 82.3                        | 4.2                             |
| Mirtazapine          | Drugs |                     | 0.7                        | 138.2                      | 0.3                            | 1.5                              | -0.4                             | 5                                 | 5                         | 21.2                             | 30.6                        | 144.3                       | 7.2                             |
| Moclobemide          | Drugs | Enzyme              | 9.4                        | 152.4                      | 5.4                            | 29.6                             | -17.2                            | 3                                 | 3                         | -2.4                             | 6.6                         | -280.6                      | 2.0                             |
| Modafinil            | Drugs | Dopaminergic GPCR   | 0.0                        | 0.0                        | 0.0                            | 0.0                              | 0.0                              | 1                                 | 1                         | -5.8                             | 2.1                         | -37.1                       | 0.8                             |
| Morphine             | Drugs | Opioid Receptor     |                            |                            |                                |                                  |                                  |                                   |                           |                                  |                             |                             |                                 |
| Nalmefene            | Drugs | Opioid Receptor     | 0.6                        | 141.4                      | 0.4                            | 5.5                              | -4.7                             | 2                                 | 2                         | 16.5                             | 4.1                         | 24.9                        | 1.5                             |
| Naltrexone           | Drugs | Opioid Receptor     | 2.8                        | 195.6                      | 1.1                            | 4.3                              | -1.5                             | 6                                 | 6                         | 3.3                              | 7.4                         | 221.9                       | 1.8                             |
| Nemonapride          | Drugs | Dopaminergic GPCR   | 11.0                       | 82.4                       | 6.3                            | 40.6                             | -13.9                            | 3                                 | 3                         | 76.0                             | 11.4                        | 14.9                        | 3.6                             |
| Nicergoline          | Drugs |                     |                            |                            |                                |                                  |                                  |                                   |                           |                                  |                             |                             |                                 |
| Nicotrol             | Drugs | Nicotinic Receptor  | 5.3                        | 148.8                      | 2.4                            | 10.2                             | -3.1                             | 5                                 | 5                         | -1.6                             | 4.9                         | -305.2                      | 1.2                             |
| Nimodipine           | Drugs | Calcium Channels    | 17.4                       | 56.3                       | 6.6                            | 46.6                             | 15.1                             | 7                                 | 7                         | 8.1                              | 5.8                         | 71.4                        | 1.4                             |
| Nortriptyline        | Drugs |                     | 0.0                        | 0.0                        | 0.0                            | 0.0                              | 0.0                              | 1                                 | 1                         |                                  |                             |                             |                                 |
| Olanzapine           | Drugs | Dopaminergic GPCR   | 7.1                        | 108.4                      | 2.9                            | 14.1                             | -1.0                             | 6                                 | 6                         | 35.9                             | 14.5                        | 40.4                        | 3.4                             |
| Oxcarbazepine        | Drugs | Reuptake Inhibitors | 9.7                        | 141.4                      | 6.8                            | 93.8                             | -80.1                            | 2                                 | 2                         | 9.5                              | 11.1                        | 116.6                       | 4.2                             |
| Oxycodone            | Drugs | Opioid Receptor     | 0.0                        | 0.0                        | 0.0                            | 0.0                              | 0.0                              | 1                                 | 1                         | 7.0                              | 2.4                         | 34.4                        | 1.2                             |
| Paliperidone         | Drugs | Dopaminergic GPCR   | 0.0                        | 0.0                        | 0.0                            | 0.0                              | 0.0                              | 2                                 | 2                         | 78.3                             | 4.9                         | 6.2                         | 1.8                             |
| Paroxetine           | Drugs | Serotonergic GPCR   | 5.5                        | 117.9                      | 2.8                            | 13.5                             | -4.1                             | 4                                 | 4                         | 64.6                             | 16.8                        | 26.1                        | 4.3                             |
| Pergolide            | Drugs | Dopaminergic GPCR   | 3.9                        | 163.8                      | 2.3                            | 12.2                             | -7.4                             | 3                                 | 3                         | 75.6                             | 4.1                         | 5.4                         | 1.2                             |

| Pub-Name      | Set   | Target Mechanism    | 3A4 Inh<br>(% @<br>3uM) SD | 3A4 Inh<br>(% @<br>3uM) CV | 3A4 Inh<br>(% @<br>3uM)<br>SEM | 3A4 Inh<br>(% @<br>3uM)<br>Upp95 | 3A4 Inh<br>(% @<br>3uM)<br>Low95 | 3A4 Inh<br>(% @<br>3uM)<br>TotCnt | 3A4 Inh<br>(% @<br>3uM) N | Dof Inh<br>(% @<br>10uM)<br>Mean | Dof Inh<br>(% @<br>10uM) SD | Dof Inh<br>(% @<br>10uM) CV | Dof Inh<br>(% @<br>10uM)<br>SEM |
|---------------|-------|---------------------|----------------------------|----------------------------|--------------------------------|----------------------------------|----------------------------------|-----------------------------------|---------------------------|----------------------------------|-----------------------------|-----------------------------|---------------------------------|
| Perospirone   | Drugs | Dopaminergic GPCR   | 3.2                        | 9.8                        | 2.3                            | 61.2                             | 3.9                              | 2                                 | 2                         | 81.5                             | 5.0                         | 6.1                         | 2.0                             |
| phenytoin     | Drugs | Reuptake Inhibitors | 10.0                       | 146.9                      | 3.3                            | 14.5                             | -0.9                             | 9                                 | 9                         | 1.1                              | 12.9                        | 1216.3                      | 3.0                             |
| Piracetam     | Drugs |                     | 0.8                        | 141.4                      | 0.5                            | 7.5                              | -6.4                             | 3                                 | 2                         | 1.8                              | 4.8                         | 265.9                       | 1.4                             |
| Pramipexole   | Drugs | Dopaminergic GPCR   | 0.0                        | 0.0                        | 0.0                            | 0.0                              | 0.0                              | 4                                 | 4                         | -1.5                             | 8.0                         | -548.9                      | 2.1                             |
| Pregabalin    | Drugs | Calcium Channels    | 2.4                        | 141.4                      | 1.7                            | 23.7                             | -20.3                            | 2                                 | 2                         | -4.2                             | 5.7                         | -134.9                      | 1.6                             |
| Propofol      | Drugs |                     | 2.8                        | 200.0                      | 1.4                            | 5.8                              | -3.0                             | 4                                 | 4                         | 1.0                              | 5.7                         | 585.8                       | 1.5                             |
| Propoxyphene  | Drugs |                     |                            |                            |                                |                                  |                                  |                                   |                           |                                  |                             |                             |                                 |
| Quazepam      | Drugs | Gaba Receptors      |                            |                            |                                |                                  |                                  |                                   |                           |                                  |                             |                             |                                 |
| Quetiapine    | Drugs | Serotonergic GPCR   | 8.6                        | 149.2                      | 3.9                            | 16.6                             | -5.0                             | 5                                 | 5                         | 15.4                             | 8.3                         | 53.7                        | 2.1                             |
| Ramelteon     | Drugs | Melatonin Receptor  | 5.3                        | 189.1                      | 2.3                            | 9.4                              | -3.8                             | 5                                 | 5                         | -1.4                             | 6.9                         | -503.0                      | 2.0                             |
| Rasagiline    | Drugs | Enzyme              | 0.0                        | 0.0                        | 0.0                            | 2.7                              | 2.7                              | 1                                 | 1                         | -6.2                             | 7.3                         | -118.2                      | 3.6                             |
| Reboxetine    | Drugs | Reuptake Inhibitors | 5.4                        | 76.3                       | 3.1                            | 20.4                             | -6.3                             | 3                                 | 3                         | 6.0                              | 7.3                         | 121.8                       | 2.6                             |
| Remifentanyl  | Drugs | Opioid Receptor     |                            |                            |                                |                                  |                                  |                                   |                           |                                  |                             |                             |                                 |
| Riluzole      | Drugs | Reuptake Inhibitors | 1.7                        | 200.0                      | 0.9                            | 3.6                              | -1.9                             | 4                                 | 4                         | -4.6                             | 4.3                         | -93.9                       | 1.4                             |
| Rimonabant    | Drugs | Cannabinoids        | 0.0                        | 0.0                        | 0.0                            | 0.0                              | 0.0                              | 3                                 | 3                         | 28.7                             | 13.3                        | 46.6                        | 4.0                             |
| Risperidone   | Drugs | Dopaminergic GPCR   | 7.5                        | 65.3                       | 2.5                            | 17.2                             | 5.7                              | 9                                 | 9                         | 75.0                             | 7.2                         | 9.7                         | 1.2                             |
| Rivastigmine  | Drugs | Enzyme              | 2.5                        | 89.1                       | 1.2                            | 6.7                              | -1.2                             | 4                                 | 4                         | 1.8                              | 6.3                         | 353.2                       | 1.6                             |
| Ropinirole    | Drugs | Dopaminergic GPCR   | 1.1                        | 200.0                      | 0.6                            | 2.3                              | -1.2                             | 4                                 | 4                         | 44.8                             | 5.2                         | 11.6                        | 1.3                             |
| Ropivacaine   | Drugs |                     | 4.9                        | 200.0                      | 2.5                            | 10.3                             | -5.4                             | 4                                 | 4                         | 11.8                             | 12.2                        | 104.1                       | 3.1                             |
| Selegiline    | Drugs | Enzyme              |                            |                            |                                |                                  |                                  |                                   |                           |                                  |                             |                             |                                 |
| Sertindole    | Drugs | Serotonergic GPCR   | 6.6                        | 126.5                      | 4.7                            | 64.6                             | -54.1                            | 2                                 | 2                         | 102.7                            | 3.5                         | 3.4                         | 1.2                             |
| Sertraline    | Drugs | Serotonergic GPCR   | 12.4                       | 120.5                      | 4.4                            | 20.9                             | -0.2                             | 8                                 | 8                         | 64.0                             | 14.6                        | 22.9                        | 3.7                             |
| Sinequan      | Drugs | Serotonergic GPCR   | 5.9                        | 117.5                      | 3.0                            | 14.6                             | -4.4                             | 4                                 | 4                         | 41.7                             | 12.3                        | 29.4                        | 3.7                             |
| Sulpiride     | Drugs | Dopaminergic GPCR   | 0.0                        | 0.0                        | 0.0                            | 1.0                              | 1.0                              | 1                                 | 1                         |                                  |                             |                             |                                 |
| Tacrine       | Drugs | Enzyme              | 4.7                        | 175.4                      | 1.7                            | 6.6                              | -1.3                             | 9                                 | 8                         | 54.6                             | 5.9                         | 10.8                        | 1.4                             |
| Talipexole    | Drugs | Dopaminergic GPCR   | 5.0                        | 125.5                      | 2.5                            | 12.0                             | -4.0                             | 4                                 | 4                         | 2.5                              | 5.8                         | 229.4                       | 1.6                             |
| Terguride     | Drugs | Dopaminergic GPCR   |                            |                            |                                |                                  |                                  |                                   |                           |                                  |                             |                             |                                 |
| Thiopental    | Drugs | Gaba Receptors      |                            |                            |                                |                                  |                                  |                                   |                           |                                  |                             |                             |                                 |
| Tiagabine     | Drugs | Gaba Receptors      | 7.9                        | 185.3                      | 3.5                            | 14.1                             | -5.6                             | 5                                 | 5                         | 19.0                             | 39.2                        | 206.2                       | 10.1                            |
| Tianeptine    | Drugs | Reuptake Inhibitors | 0.0                        | 0.0                        | 0.0                            | 0.0                              | 0.0                              | 3                                 | 3                         | -1.4                             | 8.6                         | -609.8                      | 2.5                             |
| Topiramate    | Drugs | Enzyme              | 0.0                        | 0.0                        | 0.0                            | 0.0                              | 0.0                              | 3                                 | 3                         | 1.8                              | 2.6                         | 143.2                       | 0.8                             |
| Tramadol      | Drugs | Reuptake Inhibitors | 0.6                        | 12.8                       | 0.4                            | 10.2                             | -0.7                             | 2                                 | 2                         | -0.7                             | 7.0                         | -1071.0                     | 2.5                             |
| Trazodone     | Drugs | Serotonergic GPCR   |                            |                            |                                |                                  |                                  |                                   |                           |                                  |                             |                             |                                 |
| Tropisetron   | Drugs | Serotonergic GPCR   | 1.4                        | 20.3                       | 1.0                            | 19.8                             | -5.8                             | 2                                 | 2                         | 57.6                             | 5.2                         | 9.1                         | 2.0                             |
| Valproic Acid | Drugs |                     | 0.0                        | 0.0                        | 0.0                            | 0.0                              | 0.0                              | 5                                 | 3                         | -3.8                             | 5.8                         | -152.0                      | 1.3                             |
| Varenicline   | Drugs | Nicotinic Receptor  | 11.2                       | 212.1                      | 4.6                            | 17.1                             | -6.6                             | 7                                 | 6                         | -0.4                             | 4.9                         | -1139.1                     | 1.2                             |
| Venlafaxine   | Drugs | Serotonergic GPCR   | 6.2                        | 144.2                      | 2.5                            | 10.9                             | -2.3                             | 6                                 | 6                         | -3.4                             | 4.2                         | -123.1                      | 1.1                             |

| Pub-Name      | Set        | Target Mechanism    | 3A4 Inh<br>(% @<br>3uM) SD | 3A4 Inh<br>(% @<br>3uM) CV | 3A4 Inh<br>(% @<br>3uM)<br>SEM | 3A4 Inh<br>(% @<br>3uM)<br>Upp95 | 3A4 Inh<br>(% @<br>3uM)<br>Low95 | 3A4 Inh<br>(% @<br>3uM)<br>TotCnt | 3A4 Inh<br>(% @<br>3uM) N | Dof Inh<br>(% @<br>10uM)<br>Mean | Dof Inh<br>(% @<br>10uM) SD | Dof Inh<br>(% @<br>10uM) CV | Dof Inh<br>(% @<br>10uM)<br>SEM |
|---------------|------------|---------------------|----------------------------|----------------------------|--------------------------------|----------------------------------|----------------------------------|-----------------------------------|---------------------------|----------------------------------|-----------------------------|-----------------------------|---------------------------------|
| Verapamil     | Drugs      | Calcium Channels    | 16.5                       | 86.5                       | 2.8                            | 24.9                             | 13.2                             | 35                                | 35                        | 76.4                             | 2.7                         | 3.5                         | 1.3                             |
| Vigabatrin    | Drugs      | Gaba Receptors      | 0.0                        | 0.0                        | 0.0                            | 0.0                              | 0.0                              | 2                                 | 2                         | -2.3                             | 6.2                         | -272.7                      | 2.2                             |
| Vinpocetine   | Drugs      |                     | 4.0                        | 79.0                       | 2.0                            | 11.4                             | -1.3                             | 4                                 | 4                         | 99.4                             | 3.6                         | 3.6                         | 0.9                             |
| Zaleplon      | Drugs      | Gaba Receptors      | 0.0                        | 0.0                        | 0.0                            | 4.0                              | 4.0                              | 1                                 | 1                         | -4.8                             | 2.1                         | -44.3                       | 0.7                             |
| Ziprasidone   | Drugs      | Dopaminergic GPCR   | 14.2                       | 79.9                       | 5.0                            | 29.8                             | 5.7                              | 8                                 | 8                         | 78.0                             | 27.0                        | 34.6                        | 8.1                             |
| Zolpidem      | Drugs      | Gaba Receptors      | 0.0                        | 0.0                        | 0.0                            | 6.1                              | 6.1                              | 1                                 | 1                         | 0.0                              | 2.5                         | 12672.0                     | 0.9                             |
| Zonisamide    | Drugs      | Enzyme              | 2.7                        | 144.9                      | 1.1                            | 4.7                              | -1.0                             | 6                                 | 6                         | -1.0                             | 4.7                         | -460.9                      | 1.1                             |
| Zotepine      | Drugs      | Serotonergic GPCR   | 14.1                       | 151.6                      | 8.1                            | 44.2                             | -25.7                            | 3                                 | 3                         | 81.7                             | 11.8                        | 14.5                        | 3.4                             |
| Candidate-001 | Candidates | Glutamate receptors | 0.0                        | 0.0                        | 0.0                            | 10.4                             | 10.4                             | 1                                 | 1                         |                                  |                             |                             |                                 |
| Candidate-002 | Candidates | Reuptake Inhibitors | 5.0                        | 155.4                      | 2.2                            | 9.4                              | -3.0                             | 5                                 | 5                         | 24.2                             | 11.6                        | 48.0                        | 2.6                             |
| Candidate-003 | Candidates | Reuptake Inhibitors | 5.2                        | 93.8                       | 3.0                            | 18.4                             | -7.4                             | 3                                 | 3                         | 67.1                             | 6.8                         | 10.2                        | 2.4                             |
| Candidate-004 | Candidates | Serotonergic GPCR   |                            |                            |                                |                                  |                                  |                                   |                           |                                  |                             |                             |                                 |
| Candidate-005 | Candidates | Enzyme              | 0.0                        | 0.0                        | 0.0                            | 1.3                              | 1.3                              | 1                                 | 1                         |                                  |                             |                             |                                 |
| Candidate-006 | Candidates | Peptide GPCR        |                            |                            |                                |                                  |                                  |                                   |                           |                                  |                             |                             |                                 |
| Candidate-007 | Candidates | Enzyme              | 1.9                        | 99.1                       | 0.9                            | 4.9                              | -1.1                             | 4                                 | 4                         | 4.6                              | 8.3                         | 178.4                       | 2.1                             |
| Candidate-008 | Candidates | Calcium Channels    | 0.0                        | 0.0                        | 0.0                            | 0.0                              | 0.0                              | 1                                 | 1                         | 14.9                             | 7.1                         | 47.8                        | 3.6                             |
| Candidate-009 | Candidates | Nicotinic Receptor  | 2.3                        | 158.0                      | 0.9                            | 3.8                              | -1.0                             | 6                                 | 6                         | 0.7                              | 8.4                         | 1248.3                      | 2.2                             |
| Candidate-010 | Candidates | Opioid Receptor     | 4.2                        | 141.4                      | 3.0                            | 40.6                             | -34.7                            | 2                                 | 2                         | 44.9                             | 10.2                        | 22.7                        | 3.9                             |
| Candidate-011 | Candidates | Dopaminergic GPCR   | 4.0                        | 86.6                       | 2.3                            | 14.6                             | -5.3                             | 3                                 | 3                         | 80.5                             | 7.6                         | 9.4                         | 2.7                             |
| Candidate-012 | Candidates | Peptide GPCR        | 4.2                        | 100.9                      | 3.0                            | 42.2                             | -33.8                            | 2                                 | 2                         | 24.1                             | 3.7                         | 15.4                        | 1.9                             |
| Candidate-013 | Candidates | Enzyme              | 0.0                        | 0.0                        | 0.0                            | 0.0                              | 0.0                              | 1                                 | 1                         |                                  |                             |                             |                                 |
| Candidate-014 | Candidates | Opioid Receptor     | 0.0                        | 0.0                        | 0.0                            | 16.7                             | 16.7                             | 1                                 | 1                         | 24.3                             | 11.1                        | 45.9                        | 6.4                             |
| Candidate-015 | Candidates | Nicotinic Receptor  | 2.7                        | 57.1                       | 1.5                            | 11.3                             | -2.0                             | 3                                 | 3                         | 27.4                             | 7.7                         | 28.0                        | 2.2                             |
| Candidate-016 | Candidates | Gaba Receptors      | 7.6                        | 63.9                       | 2.5                            | 17.7                             | 6.0                              | 9                                 | 9                         | 8.8                              | 11.5                        | 130.5                       | 3.1                             |
| Candidate-017 | Candidates | Enzyme              | 0.0                        | 0.0                        | 0.0                            | 0.0                              | 0.0                              | 1                                 | 1                         | 43.8                             | 2.6                         | 6.0                         | 1.3                             |
| Candidate-018 | Candidates | Cannabinoids        | 2.4                        | 244.9                      | 1.0                            | 3.6                              | -1.6                             | 6                                 | 6                         | 22.1                             | 10.2                        | 46.4                        | 2.3                             |
| Candidate-019 | Candidates | Peptide GPCR        | 9.1                        | 60.8                       | 3.5                            | 23.3                             | 6.7                              | 7                                 | 7                         |                                  |                             |                             |                                 |
| Candidate-020 | Candidates | Glutamate receptors | 0.0                        | 0.0                        | 0.0                            | 0.0                              | 0.0                              | 1                                 | 1                         | 79.8                             | 4.9                         | 6.2                         | 2.5                             |
| Candidate-021 | Candidates | Enzyme              | 1.2                        | 200.0                      | 0.6                            | 2.5                              | -1.3                             | 5                                 | 4                         | 4.4                              | 13.2                        | 297.8                       | 3.0                             |
| Candidate-022 | Candidates | Enzyme              | 7.5                        | 29.4                       | 3.7                            | 37.4                             | 13.5                             | 4                                 | 4                         | 61.2                             | 3.5                         | 5.7                         | 1.2                             |
| Candidate-023 | Candidates | Nicotinic Receptor  | 1.4                        | 52.2                       | 0.8                            | 6.1                              | -0.8                             | 3                                 | 3                         | 3.8                              | 7.8                         | 202.4                       | 2.2                             |
| Candidate-024 | Candidates | Calcium Channels    | 0.0                        | 0.0                        | 0.0                            | 0.0                              | 0.0                              | 1                                 | 1                         | -1.1                             | 6.0                         | -527.2                      | 3.4                             |
| Candidate-025 | Candidates | Reuptake Inhibitors | 0.0                        | 0.0                        | 0.0                            | 0.0                              | 0.0                              | 2                                 | 2                         | 63.7                             | 2.0                         | 3.2                         | 1.0                             |
| Candidate-026 | Candidates | Serotonergic GPCR   | 5.4                        | 149.1                      | 2.4                            | 10.3                             | -3.1                             | 5                                 | 5                         | 67.3                             | 16.5                        | 24.5                        | 4.8                             |
| Candidate-027 | Candidates | Serotonergic GPCR   | 6.9                        | 141.4                      | 4.9                            | 67.0                             | -57.2                            | 2                                 | 2                         | 31.5                             | 1.6                         | 5.2                         | 0.8                             |
| Candidate-028 | Candidates | Histaminergic GPCR  | 24.3                       | 184.6                      | 9.9                            | 38.9                             | -12.6                            | 6                                 | 6                         | 7.2                              | 5.8                         | 80.6                        | 2.0                             |
| Candidate-029 | Candidates | Glutamate receptors | 11.0                       | 71.9                       | 7.8                            | 113.7                            | -83.2                            | 3                                 | 2                         |                                  |                             |                             |                                 |



| Pub-Name      | Set        | Target Mechanism    | 3A4 Inh<br>(% @<br>3uM) SD | 3A4 Inh<br>(% @<br>3uM) CV | 3A4 Inh<br>(% @<br>3uM)<br>SEM | 3A4 Inh<br>(% @<br>3uM)<br>Upp95 | 3A4 Inh<br>(% @<br>3uM)<br>Low95 | 3A4 Inh<br>(% @<br>3uM)<br>TotCnt | 3A4 Inh<br>(% @<br>3uM) N | Dof Inh<br>(% @<br>10uM)<br>Mean | Dof Inh<br>(% @<br>10uM) SD | Dof Inh<br>(% @<br>10uM) CV | Dof Inh<br>(% @<br>10uM)<br>SEM |
|---------------|------------|---------------------|----------------------------|----------------------------|--------------------------------|----------------------------------|----------------------------------|-----------------------------------|---------------------------|----------------------------------|-----------------------------|-----------------------------|---------------------------------|
| Candidate-030 | Candidates | Peptide GPCR        | 9.1                        | 67.4                       | 6.5                            | 95.6                             | -68.5                            | 2                                 | 2                         |                                  |                             |                             |                                 |
| Candidate-031 | Candidates | Serotonergic GPCR   | 10.8                       | 64.1                       | 4.9                            | 30.5                             | 3.3                              | 5                                 | 5                         | 4.4                              | 4.6                         | 104.7                       | 1.0                             |
| Candidate-032 | Candidates | Gaba Receptors      | 16.2                       | 58.6                       | 7.2                            | 47.8                             | 7.3                              | 5                                 | 5                         | -4.0                             | 9.9                         | -247.1                      | 3.7                             |
| Candidate-033 | Candidates | Opioid Receptor     | 3.3                        | 130.6                      | 1.0                            | 4.7                              | 0.3                              | 10                                | 10                        | 72.3                             | 9.5                         | 13.2                        | 1.6                             |
| Candidate-034 | Candidates | Reuptake Inhibitors | 8.3                        | 20.1                       | 2.9                            | 48.2                             | 34.1                             | 9                                 | 8                         | 67.9                             | 9.5                         | 14.0                        | 2.9                             |
| Candidate-035 | Candidates | Calcium Channels    | 1.3                        | 141.4                      | 1.0                            | 13.0                             | -11.1                            | 2                                 | 2                         | 9.4                              | 10.9                        | 115.7                       | 4.1                             |
| Candidate-036 | Candidates | Peptide GPCR        | 0.0                        | 0.0                        | 0.0                            | 10.4                             | 10.4                             | 1                                 | 1                         |                                  |                             |                             |                                 |
| Candidate-037 | Candidates | Gaba Receptors      | 0.0                        | 0.0                        | 0.0                            | 0.0                              | 0.0                              | 4                                 | 4                         | 6.6                              | 10.4                        | 158.4                       | 2.7                             |
| Candidate-038 | Candidates | Serotonergic GPCR   | 0.0                        | 0.0                        | 0.0                            | 12.2                             | 12.2                             | 1                                 | 1                         |                                  |                             |                             |                                 |
| Candidate-039 | Candidates | Glutamate receptors | 6.1                        | 51.5                       | 3.5                            | 27.2                             | -3.3                             | 3                                 | 3                         | 83.3                             | 6.2                         | 7.4                         | 1.8                             |
| Candidate-040 | Candidates | Enzyme              | 0.0                        | 0.0                        | 0.0                            | 0.0                              | 0.0                              | 1                                 | 1                         |                                  |                             |                             |                                 |
| Candidate-041 | Candidates | Peptide GPCR        | 8.7                        | 86.8                       | 5.0                            | 31.8                             | -11.6                            | 3                                 | 3                         | 58.2                             | 2.9                         | 5.1                         | 1.5                             |
| Candidate-042 | Candidates | Serotonergic GPCR   | 5.0                        | 129.8                      | 1.8                            | 8.1                              | -0.4                             | 8                                 | 8                         | 46.0                             | 4.6                         | 10.1                        | 1.6                             |
| Candidate-043 | Candidates | Peptide GPCR        | 7.8                        | 180.8                      | 3.2                            | 12.7                             | -4.0                             | 8                                 | 6                         | 24.9                             | 8.8                         | 35.1                        | 4.4                             |
| Candidate-044 | Candidates | Serotonergic GPCR   | 9.0                        | 82.2                       | 3.7                            | 20.4                             | 1.4                              | 6                                 | 6                         | 39.1                             | 12.0                        | 30.6                        | 3.0                             |
| Candidate-045 | Candidates | Cannabinoids        | 0.0                        | 0.0                        | 0.0                            | 0.0                              | 0.0                              | 1                                 | 1                         | 19.4                             | 4.9                         | 25.1                        | 2.8                             |
| Candidate-046 | Candidates | Serotonergic GPCR   | 0.0                        | 0.0                        | 0.0                            | 2.3                              | 2.3                              | 1                                 | 1                         |                                  |                             |                             |                                 |
| Candidate-047 | Candidates | Calcium Channels    | 1.2                        | 99.2                       | 0.8                            | 11.6                             | -9.3                             | 2                                 | 2                         | -4.7                             | 2.9                         | -61.7                       | 1.4                             |
| Candidate-048 | Candidates | Dopaminergic GPCR   | 3.8                        | 97.2                       | 1.6                            | 8.0                              | -0.1                             | 6                                 | 6                         | 94.9                             | 2.3                         | 2.4                         | 0.8                             |
| Candidate-049 | Candidates | Serotonergic GPCR   | 12.9                       | 137.5                      | 9.1                            | 125.3                            | -106.6                           | 2                                 | 2                         | 80.5                             | 9.3                         | 11.6                        | 3.8                             |
| Candidate-050 | Candidates | Gaba Receptors      | 12.1                       | 126.3                      | 6.0                            | 28.9                             | -9.8                             | 4                                 | 4                         | 14.9                             | 12.1                        | 80.9                        | 3.6                             |
| Candidate-051 | Candidates | Reuptake Inhibitors | 5.1                        | 244.9                      | 2.1                            | 7.6                              | -3.4                             | 6                                 | 6                         | 10.2                             | 6.7                         | 65.3                        | 2.4                             |
| Candidate-052 | Candidates | Enzyme              | 0.0                        | 0.0                        | 0.0                            | 12.8                             | 12.8                             | 1                                 | 1                         | 6.1                              | 4.9                         | 80.7                        | 2.5                             |
| Candidate-053 | Candidates | Nicotinic Receptor  | 0.0                        | 0.0                        | 0.0                            | 4.8                              | 4.8                              | 1                                 | 1                         | 9.0                              | 5.5                         | 61.5                        | 2.8                             |
| Candidate-054 | Candidates | Opioid Receptor     | 0.0                        | 0.0                        | 0.0                            | 25.7                             | 25.7                             | 1                                 | 1                         | 74.6                             | 10.1                        | 13.5                        | 5.0                             |
| Candidate-055 | Candidates | Enzyme              | 0.0                        | 0.0                        | 0.0                            | 0.0                              | 0.0                              | 3                                 | 3                         | 98.6                             | 2.2                         | 2.2                         | 0.7                             |
| Candidate-056 | Candidates | Enzyme              | 23.3                       | 112.9                      | 11.7                           | 57.9                             | -16.7                            | 4                                 | 4                         | 30.3                             | 20.5                        | 67.6                        | 6.2                             |
| Candidate-057 | Candidates | Dopaminergic GPCR   |                            |                            |                                |                                  |                                  | 3                                 | 0                         | -1.7                             | 9.1                         | -544.7                      | 2.9                             |
| Candidate-058 | Candidates | Peptide GPCR        |                            |                            |                                |                                  |                                  |                                   |                           |                                  |                             |                             |                                 |
| Candidate-059 | Candidates | Dopaminergic GPCR   |                            |                            |                                |                                  |                                  |                                   |                           |                                  |                             |                             |                                 |
| Candidate-060 | Candidates | Serotonergic GPCR   | 7.9                        | 61.5                       | 3.2                            | 21.2                             | 4.4                              | 6                                 | 6                         | 70.6                             | 11.9                        | 16.8                        | 3.1                             |
| Candidate-061 | Candidates | Histaminergic GPCR  | 7.9                        | 173.2                      | 4.6                            | 24.2                             | -15.1                            | 3                                 | 3                         | 3.2                              | 3.1                         | 96.5                        | 0.9                             |
| Candidate-062 | Candidates | Dopaminergic GPCR   | 15.8                       | 100.3                      | 11.2                           | 158.1                            | -126.5                           | 2                                 | 2                         | 59.0                             | 1.5                         | 2.5                         | 0.7                             |
| Candidate-063 | Candidates | Nicotinic Receptor  | 0.0                        | 0.0                        | 0.0                            | 0.0                              | 0.0                              | 2                                 | 2                         | 3.7                              | 7.4                         | 197.5                       | 2.6                             |
| Candidate-064 | Candidates | Serotonergic GPCR   | 0.0                        | 0.0                        | 0.0                            | 0.0                              | 0.0                              | 4                                 | 4                         | 19.4                             | 6.7                         | 34.6                        | 1.9                             |
| Candidate-065 | Candidates | Peptide GPCR        | 0.4                        | 3.2                        | 0.3                            | 17.1                             | 9.5                              | 2                                 | 2                         | -2.5                             | 7.5                         | -300.5                      | 4.3                             |
| Candidate-066 | Candidates | Serotonergic GPCR   | 2.4                        | 28.6                       | 1.4                            | 14.1                             | 2.4                              | 3                                 | 3                         | 26.3                             | 3.8                         | 14.5                        | 1.9                             |

| Pub-Name      | Set        | Target Mechanism    | 3A4 Inh<br>(% @<br>3uM) SD | 3A4 Inh<br>(% @<br>3uM) CV | 3A4 Inh<br>(% @<br>3uM)<br>SEM | 3A4 Inh<br>(% @<br>3uM)<br>Upp95 | 3A4 Inh<br>(% @<br>3uM)<br>Low95 | 3A4 Inh<br>(% @<br>3uM)<br>TotCnt | 3A4 Inh<br>(% @<br>3uM) N | Dof Inh<br>(% @<br>10uM)<br>Mean | Dof Inh<br>(% @<br>10uM) SD | Dof Inh<br>(% @<br>10uM) CV | Dof Inh<br>(% @<br>10uM)<br>SEM |
|---------------|------------|---------------------|----------------------------|----------------------------|--------------------------------|----------------------------------|----------------------------------|-----------------------------------|---------------------------|----------------------------------|-----------------------------|-----------------------------|---------------------------------|
| Candidate-067 | Candidates | Dopaminergic GPCR   | 7.8                        | 44.8                       | 3.9                            | 30.0                             | 4.9                              | 4                                 | 4                         | 36.6                             | 37.9                        | 103.6                       | 13.4                            |
| Candidate-068 | Candidates | Serotonergic GPCR   | 0.0                        | 0.0                        | 0.0                            | 0.0                              | 0.0                              | 2                                 | 2                         | 8.2                              | 12.2                        | 148.7                       | 4.6                             |
| Candidate-069 | Candidates | Reuptake Inhibitors | 0.0                        | 0.0                        | 0.0                            | 10.5                             | 10.5                             | 1                                 | 1                         |                                  |                             |                             |                                 |
| Candidate-070 | Candidates | Dopaminergic GPCR   | 0.0                        | 0.0                        | 0.0                            | 0.0                              | 0.0                              | 1                                 | 1                         | 4.2                              | 3.8                         | 89.9                        | 2.7                             |
| Candidate-071 | Candidates | Reuptake Inhibitors | 0.0                        | 0.0                        | 0.0                            | 0.0                              | 0.0                              | 2                                 | 2                         | 27.7                             | 7.1                         | 25.7                        | 2.5                             |
| Candidate-072 | Candidates | Dopaminergic GPCR   | 0.0                        | 0.0                        | 0.0                            | 0.0                              | 0.0                              | 3                                 | 3                         | 97.0                             | 2.9                         | 2.9                         | 0.9                             |
| Candidate-073 | Candidates | Gaba Receptors      | 3.4                        | 119.9                      | 1.1                            | 5.4                              | 0.2                              | 9                                 | 9                         | -4.3                             | 7.6                         | -175.2                      | 1.9                             |
| Candidate-074 | Candidates | Peptide GPCR        | 0.0                        | 0.0                        | 0.0                            | 0.0                              | 0.0                              | 1                                 | 1                         |                                  |                             |                             |                                 |
| Candidate-075 | Candidates | Nicotinic Receptor  | 1.1                        | 141.4                      | 0.8                            | 10.8                             | -9.2                             | 2                                 | 2                         | 13.3                             | 10.5                        | 79.1                        | 3.7                             |
| Candidate-076 | Candidates | Nicotinic Receptor  | 9.4                        | 120.3                      | 4.7                            | 23.0                             | -7.3                             | 4                                 | 4                         | 3.9                              | 11.7                        | 302.9                       | 2.6                             |
| Candidate-077 | Candidates | Gaba Receptors      | 0.9                        | 200.0                      | 0.4                            | 1.8                              | -1.0                             | 4                                 | 4                         | -3.9                             | 10.6                        | -269.3                      | 2.8                             |
| Candidate-078 | Candidates | Reuptake Inhibitors | 12.6                       | 143.2                      | 4.8                            | 20.2                             | -2.6                             | 7                                 | 7                         | 8.8                              | 5.0                         | 57.0                        | 1.3                             |
| Candidate-079 | Candidates | Calcium Channels    | 0.0                        | 0.0                        | 0.0                            | 10.3                             | 10.3                             | 1                                 | 1                         | 16.6                             | 11.0                        | 66.5                        | 7.8                             |
| Candidate-080 | Candidates | Dopaminergic GPCR   | 0.0                        | 0.0                        | 0.0                            | 0.0                              | 0.0                              | 1                                 | 1                         |                                  |                             |                             |                                 |
| Candidate-081 | Candidates | Serotonergic GPCR   | 19.2                       | 189.3                      | 9.6                            | 40.9                             | -20.6                            | 4                                 | 4                         | 38.8                             | 6.8                         | 17.4                        | 2.4                             |
| Candidate-082 | Candidates | Gaba Receptors      | 3.4                        | 144.7                      | 1.5                            | 6.6                              | -1.9                             | 5                                 | 5                         | -0.3                             | 5.7                         | -1733.0                     | 1.3                             |
| Candidate-083 | Candidates | Cannabinoids        | 0.0                        | 0.0                        | 0.0                            | 0.0                              | 0.0                              | 2                                 | 2                         | 13.0                             | 11.1                        | 85.6                        | 5.6                             |
| Candidate-084 | Candidates | Gaba Receptors      | 10.5                       | 145.3                      | 3.7                            | 16.1                             | -1.7                             | 8                                 | 8                         | 19.5                             | 12.4                        | 63.6                        | 3.6                             |
| Candidate-085 | Candidates | Reuptake Inhibitors |                            |                            |                                |                                  |                                  |                                   |                           |                                  |                             |                             |                                 |
| Candidate-086 | Candidates | Muscarinic Receptor | 0.0                        | 0.0                        | 0.0                            | 6.4                              | 6.4                              | 2                                 | 1                         | 24.4                             | 6.2                         | 25.4                        | 3.1                             |
| Candidate-087 | Candidates | Cannabinoids        | 22.0                       | 108.3                      | 15.5                           | 217.5                            | -177.0                           | 2                                 | 2                         | -6.8                             | 6.6                         | -97.2                       | 2.5                             |
| Candidate-088 | Candidates | Dopaminergic GPCR   | 0.0                        | 0.0                        | 0.0                            | 0.0                              | 0.0                              | 1                                 | 1                         |                                  |                             |                             |                                 |
| Candidate-089 | Candidates | Enzyme              | 2.0                        | 173.2                      | 1.2                            | 6.3                              | -3.9                             | 3                                 | 3                         | -0.8                             | 6.3                         | -802.7                      | 1.9                             |
| Candidate-090 | Candidates | Glutamate receptors | 16.0                       | 86.6                       | 9.3                            | 58.3                             | -21.3                            | 5                                 | 3                         | -5.2                             | 5.4                         | -103.0                      | 1.9                             |
| Candidate-091 | Candidates | Gaba Receptors      | 2.5                        | 200.0                      | 1.3                            | 5.3                              | -2.8                             | 4                                 | 4                         | 36.2                             | 8.3                         | 23.0                        | 2.4                             |
| Candidate-092 | Candidates | Reuptake Inhibitors | 0.0                        | 0.0                        | 0.0                            | 0.0                              | 0.0                              | 2                                 | 2                         | 28.0                             | 5.2                         | 18.6                        | 2.6                             |
| Candidate-093 | Candidates | Muscarinic Receptor | 0.0                        | 0.0                        | 0.0                            | 0.0                              | 0.0                              | 1                                 | 1                         | 23.0                             | 2.3                         | 10.0                        | 1.2                             |
| Candidate-094 | Candidates | Dopaminergic GPCR   | 7.4                        | 68.0                       | 4.3                            | 29.2                             | -7.5                             | 3                                 | 3                         | 94.3                             | 5.3                         | 5.7                         | 1.7                             |
| Candidate-095 | Candidates | Gaba Receptors      | 2.7                        | 147.5                      | 1.4                            | 6.2                              | -2.5                             | 4                                 | 4                         | 0.1                              | 12.3                        | 13720.6                     | 3.9                             |
| Candidate-096 | Candidates | Serotonergic GPCR   |                            |                            |                                |                                  |                                  |                                   |                           |                                  |                             |                             |                                 |
| Candidate-097 | Candidates | Reuptake Inhibitors | 3.5                        | 177.0                      | 1.4                            | 5.8                              | -1.8                             | 6                                 | 6                         | 44.2                             | 8.4                         | 18.9                        | 2.1                             |
| Candidate-098 | Candidates | Enzyme              | 10.4                       | 77.9                       | 4.6                            | 26.3                             | 0.3                              | 5                                 | 5                         | 43.1                             | 20.1                        | 46.6                        | 5.2                             |
| Candidate-099 | Candidates | Peptide GPCR        | 3.2                        | 59.9                       | 2.2                            | 33.6                             | -23.1                            | 3                                 | 2                         | 71.5                             | 14.5                        | 20.2                        | 4.4                             |
| Candidate-100 | Candidates | Enzyme              | 0.0                        | 0.0                        | 0.0                            | 0.0                              | 0.0                              | 1                                 | 1                         | 18.3                             | 5.3                         | 29.1                        | 2.7                             |
| Candidate-101 | Candidates | Dopaminergic GPCR   | 6.3                        | 101.6                      | 3.6                            | 21.8                             | -9.4                             | 3                                 | 3                         | 62.0                             | 7.6                         | 12.2                        | 3.8                             |
| Candidate-102 | Candidates | Serotonergic GPCR   | 5.2                        | 58.7                       | 3.0                            | 21.8                             | -4.1                             | 3                                 | 3                         | 87.7                             | 9.5                         | 10.9                        | 2.8                             |
| Candidate-103 | Candidates | Dopaminergic GPCR   | 0.0                        | 0.0                        | 0.0                            | 0.0                              | 0.0                              | 1                                 | 1                         | 86.8                             | 2.7                         | 3.1                         | 1.4                             |

| Pub-Name      | Set        | Target Mechanism   | 3A4 Inh<br>(% @<br>3uM) SD | 3A4 Inh<br>(% @<br>3uM) CV | 3A4 Inh<br>(% @<br>3uM)<br>SEM | 3A4 Inh<br>(% @<br>3uM)<br>Upp95 | 3A4 Inh<br>(% @<br>3uM)<br>Low95 | 3A4 Inh<br>(% @<br>3uM)<br>TotCnt | 3A4 Inh<br>(% @<br>3uM) N | Dof Inh<br>(% @<br>10uM)<br>Mean | Dof Inh<br>(% @<br>10uM) SD | Dof Inh<br>(% @<br>10uM) CV | Dof Inh<br>(% @<br>10uM)<br>SEM |
|---------------|------------|--------------------|----------------------------|----------------------------|--------------------------------|----------------------------------|----------------------------------|-----------------------------------|---------------------------|----------------------------------|-----------------------------|-----------------------------|---------------------------------|
| Candidate-104 | Candidates | Peptide GPCR       | 1.0                        | 6.0                        | 0.6                            | 19.4                             | 14.4                             | 3                                 | 3                         | 19.6                             | 1.8                         | 9.4                         | 0.9                             |
| Candidate-105 | Candidates | Gaba Receptors     | 0.1                        | 173.2                      | 0.1                            | 0.4                              | -0.2                             | 3                                 | 3                         | 6.2                              | 11.6                        | 187.8                       | 3.5                             |
| Candidate-106 | Candidates | Peptide GPCR       | 0.0                        | 0.0                        | 0.0                            | 64.0                             | 64.0                             | 1                                 | 1                         | 6.2                              | 5.5                         | 87.8                        | 2.7                             |
| Candidate-107 | Candidates | Calcium Channels   | 0.0                        | 0.0                        | 0.0                            | 0.0                              | 0.0                              | 1                                 | 1                         | -5.2                             | 2.3                         | -43.2                       | 1.3                             |
| Candidate-108 | Candidates | Nicotinic Receptor | 11.4                       | 43.0                       | 5.7                            | 44.8                             | 8.3                              | 4                                 | 4                         | 1.7                              | 7.7                         | 443.5                       | 2.4                             |

| Pub-Name           | Set   | Target Mechanism    | Dof Inh<br>(% @<br>10uM)<br>Upp95 | Dof Inh<br>(% @<br>10uM)<br>Low95 | Dof Inh<br>(% @<br>10uM) N | THLE<br>IC50 OP | THLE<br>IC50<br>Mean | THLE<br>IC50 SD | THLE<br>IC50 CV | THLE<br>IC50<br>SEM | THLE<br>IC50<br>Upp95 | THLE<br>IC50<br>Low95 | THLE<br>IC50 N |
|--------------------|-------|---------------------|-----------------------------------|-----------------------------------|----------------------------|-----------------|----------------------|-----------------|-----------------|---------------------|-----------------------|-----------------------|----------------|
| Acamprosate        | Drugs | Glutamate receptors | -0.9                              | -4.8                              | 16                         | >               | 300.0                |                 | 0.0             |                     | 300.0                 | 300.0                 | 1              |
| Alprazolam         | Drugs | Gaba Receptors      | -3.6                              | -7.4                              | 4                          |                 |                      |                 |                 |                     |                       |                       |                |
| Amfebutamone       | Drugs | Dopaminergic GPCR   | 2.6                               | -4.3                              | 10                         | >               | 300.0                | 0.0             | 0.0             |                     | 300.0                 | 300.0                 | 8              |
| Amisulpride        | Drugs | Dopaminergic GPCR   | 16.8                              | 13.6                              | 12                         | >               | 300.0                | 0.0             | 0.0             |                     | 300.0                 | 300.0                 | 4              |
| Amphetamine        | Drugs | Reuptake Inhibitors |                                   |                                   |                            |                 |                      |                 |                 |                     |                       |                       |                |
| Aniracetam         | Drugs |                     | 8.5                               | -1.8                              | 8                          | >               | 289.3                | 12.4            | 5.2             | 10.5                | 320.3                 | 261.3                 | 5              |
| Apomorphine        | Drugs | Dopaminergic GPCR   | 24.8                              | 18.8                              | 24                         | =               | 77.6                 | 4.0             | 3.8             | 3.8                 | 87.2                  | 69.0                  | 7              |
| Aprepitant         | Drugs |                     | 18.1                              | 6.2                               | 14                         | =               | 33.6                 | 4.3             | 7.1             | 3.6                 | 44.3                  | 25.5                  | 6              |
| Aripiprazole       | Drugs | Dopaminergic GPCR   | 89.6                              | 83.1                              | 21                         | =               | 29.1                 | 8.8             | 11.0            | 5.5                 | 47.6                  | 17.8                  | 6              |
| Atomoxetine        | Drugs | Reuptake Inhibitors | 69.8                              | 56.5                              | 16                         | =               | 182.6                | 23.2            | 5.1             | 20.1                | 237.8                 | 140.2                 | 8              |
| Bromazepam         | Drugs | Gaba Receptors      | 17.0                              | -6.5                              | 4                          |                 |                      |                 |                 |                     |                       |                       |                |
| Bromocriptine      | Drugs | Dopaminergic GPCR   | 19.0                              | 19.0                              | 11                         | >               | 83.9                 | 168.5           | 35.4            | 63.1                | 689.2                 | 10.2                  | 5              |
| Brotizolam         | Drugs | Gaba Receptors      | 5.0                               | -0.9                              | 12                         | =               | 71.3                 | 21.5            | 13.7            | 14.0                | 123.5                 | 41.1                  | 5              |
| Budipine           | Drugs | Calcium Channels    |                                   |                                   |                            |                 |                      |                 |                 |                     |                       |                       |                |
| Buprenorphine      | Drugs | Opioid Receptor     |                                   |                                   |                            |                 |                      |                 |                 |                     |                       |                       |                |
| Buspirone          | Drugs | Serotonergic GPCR   | 31.2                              | 23.5                              | 16                         | >               | 300.0                | 0.0             | 0.0             |                     | 300.0                 | 300.0                 | 8              |
| Cabergoline        | Drugs | Dopaminergic GPCR   | 38.1                              | 24.3                              | 20                         | >               | 300.0                | 0.0             | 0.0             |                     | 300.0                 | 300.0                 | 6              |
| Caffeine           | Drugs | Serotonergic GPCR   |                                   |                                   |                            | >               | 300.0                |                 | 0.0             |                     | 300.0                 | 300.0                 | 1              |
| Carbamazepine      | Drugs | Reuptake Inhibitors | 2.3                               | -2.9                              | 22                         | >               | 300.0                | 0.0             | 0.0             |                     | 300.0                 | 300.0                 | 7              |
| Carisoprodol       | Drugs |                     | 13.1                              | 0.7                               | 4                          | >               | 300.0                |                 | 0.0             |                     | 300.0                 | 300.0                 | 1              |
| Chlorpromazine     | Drugs | Dopaminergic GPCR   |                                   |                                   |                            | =               | 26.6                 |                 | 0.0             |                     | 26.6                  | 26.6                  | 1              |
| Citalopram         | Drugs | Serotonergic GPCR   | 52.0                              | 30.1                              | 14                         | >               | 272.3                | 35.8            | 7.2             | 26.4                | 350.3                 | 211.7                 | 6              |
| Clomipramine       | Drugs | Serotonergic GPCR   | 79.5                              | 60.6                              | 12                         | =               | 57.9                 | 1.7             | 3.4             | 1.5                 | 62.0                  | 54.0                  | 6              |
| Clonazepam         | Drugs | Gaba Receptors      | -2.5                              | -5.8                              | 8                          |                 |                      |                 |                 |                     |                       |                       |                |
| Clozapine          | Drugs | Serotonergic GPCR   | 54.8                              | 45.1                              | 27                         | =               | 148.0                | 10.1            | 3.3             | 9.7                 | 172.1                 | 127.3                 | 9              |
| Cyclobenzaprine    | Drugs |                     |                                   |                                   |                            |                 |                      |                 |                 |                     |                       |                       |                |
| Dexmethylphenidate | Drugs | Dopaminergic GPCR   |                                   |                                   |                            |                 |                      |                 |                 |                     |                       |                       |                |
| Dextropropoxyphene | Drugs | Opioid Receptor     | 5.7                               | -4.3                              | 4                          | =               | 52.9                 |                 | 0.0             |                     | 52.9                  | 52.9                  | 1              |
| Diazepam           | Drugs | Gaba Receptors      |                                   |                                   |                            |                 |                      |                 |                 |                     |                       |                       |                |
| Donepezil          | Drugs | Enzyme              | 80.3                              | 64.9                              | 12                         | >               | 300.0                | 0.0             | 0.0             |                     | 300.0                 | 300.0                 | 6              |
| Dronabinol         | Drugs | Cannabinoids        |                                   |                                   |                            |                 |                      |                 |                 |                     |                       |                       |                |
| Duloxetine         | Drugs | Serotonergic GPCR   | 88.5                              | 34.7                              | 8                          | =               | 33.5                 | 5.1             | 9.7             | 4.8                 | 49.8                  | 22.5                  | 5              |
| Eletriptan         | Drugs | Serotonergic GPCR   | 60.0                              | 47.8                              | 12                         | >               | 285.8                | 17.0            | 4.1             | 13.9                | 321.1                 | 254.4                 | 7              |
| Escitalopram       | Drugs | Serotonergic GPCR   | 61.2                              | 53.2                              | 16                         | >               | 288.3                | 13.6            | 4.3             | 11.4                | 319.7                 | 260.1                 | 6              |
| Eszopiclone        | Drugs | Gaba Receptors      |                                   |                                   |                            |                 |                      |                 |                 |                     |                       |                       |                |
| Ethosuximide       | Drugs | Calcium Channels    |                                   |                                   |                            | >               | 300.0                | 0.0             | 0.0             |                     | 300.0                 | 300.0                 | 4              |
| Felbamate          | Drugs | Gaba Receptors      | 1.1                               | -5.6                              | 15                         | >               | 300.0                | 0.0             | 0.0             |                     | 300.0                 | 300.0                 | 5              |

| Pub-Name             | Set   | Target Mechanism    | Dof Inh<br>(% @<br>10uM)<br>Upp95 | Dof Inh<br>(% @<br>10uM)<br>Low95 | Dof Inh<br>(% @<br>10uM) N | THLE<br>IC50 OP | THLE<br>IC50<br>Mean | THLE<br>IC50 SD | THLE<br>IC50 CV | THLE<br>IC50<br>SEM | THLE<br>IC50<br>Upp95 | THLE<br>IC50<br>Low95 | THLE<br>IC50 N |
|----------------------|-------|---------------------|-----------------------------------|-----------------------------------|----------------------------|-----------------|----------------------|-----------------|-----------------|---------------------|-----------------------|-----------------------|----------------|
| Fentanyl             | Drugs | Opioid Receptor     |                                   |                                   |                            |                 |                      |                 |                 |                     |                       |                       |                |
| Flumazenil           | Drugs | Gaba Receptors      | 10.8                              | -5.5                              | 12                         | >               | 300.0                | 0.0             | 0.0             |                     | 300.0                 | 300.0                 | 6              |
| Fluoxetine           | Drugs | Serotonergic GPCR   | 63.1                              | 53.4                              | 25                         | =               | 82.3                 | 20.2            | 6.2             | 17.4                | 134.0                 | 50.6                  | 9              |
| Fluvoxamine          | Drugs | Serotonergic GPCR   | 35.1                              | 23.7                              | 23                         | >               | 142.4                | 18.7            | 6.0             | 19.6                | 198.3                 | 102.3                 | 7              |
| Gabapentin           | Drugs | Calcium Channels    | 3.4                               | -3.8                              | 20                         | >               | 300.0                | 0.0             | 0.0             |                     | 300.0                 | 300.0                 | 7              |
| Galantamine          | Drugs | Enzyme              | 6.5                               | -2.6                              | 8                          | >               | 300.0                |                 | 0.0             |                     | 300.0                 | 300.0                 | 1              |
| Haloperidol          | Drugs | Dopaminergic GPCR   |                                   |                                   |                            |                 |                      |                 |                 |                     |                       |                       |                |
| Hydrocodone          | Drugs | Opioid Receptor     | 20.3                              | 3.7                               | 3                          |                 |                      |                 |                 |                     |                       |                       |                |
| Indeloxazine         | Drugs | Reuptake Inhibitors | 1.9                               | -6.9                              | 8                          |                 |                      |                 |                 |                     |                       |                       |                |
| Lamotrigine          | Drugs | Reuptake Inhibitors | -1.2                              | -4.9                              | 16                         | >               | 277.0                | 29.6            | 5.5             | 22.1                | 335.4                 | 228.8                 | 7              |
| Levetiracetam        | Drugs | Calcium Channels    | 0.3                               | -6.7                              | 13                         | >               | 300.0                | 0.0             | 0.0             |                     | 300.0                 | 300.0                 | 6              |
| Levomethadyl Acetate | Drugs | Opioid Receptor     |                                   |                                   |                            |                 |                      |                 |                 |                     |                       |                       |                |
| Lofexidine           | Drugs |                     | 33.3                              | 18.6                              | 7                          | >               | 300.0                | 0.0             | 0.0             |                     | 300.0                 | 300.0                 | 4              |
| Lorazepam            | Drugs | Gaba Receptors      | 8.7                               | -3.3                              | 8                          |                 |                      |                 |                 |                     |                       |                       |                |
| Meprobamate          | Drugs |                     |                                   |                                   |                            |                 |                      |                 |                 |                     |                       |                       |                |
| Methylphenidate      | Drugs | Dopaminergic GPCR   | 15.0                              | 0.2                               | 8                          | >               | 300.0                |                 | 0.0             |                     | 300.0                 | 300.0                 | 1              |
| Metoclopramide       | Drugs |                     |                                   |                                   |                            | >               | 300.0                | 0.0             | 0.0             |                     | 300.0                 | 300.0                 | 2              |
| Midazolam            | Drugs | Gaba Receptors      |                                   |                                   |                            |                 |                      |                 |                 |                     |                       |                       |                |
| Milnacipran          | Drugs | Serotonergic GPCR   |                                   |                                   |                            |                 |                      |                 |                 |                     |                       |                       |                |
| Minaprine            | Drugs | Enzyme              | 23.4                              | 3.4                               | 7                          | >               | 300.0                | 0.0             | 0.0             |                     | 300.0                 | 300.0                 | 5              |
| Mirtazapine          | Drugs |                     | 36.3                              | 6.1                               | 18                         | >               | 299.1                | 1.0             | 1.2             | 0.9                 | 301.5                 | 296.8                 | 6              |
| Moclobemide          | Drugs | Enzyme              | -2.4                              | -2.4                              | 11                         | >               | 300.0                | 0.0             | 0.0             |                     | 300.0                 | 300.0                 | 5              |
| Modafinil            | Drugs | Dopaminergic GPCR   | -4.0                              | -7.6                              | 8                          |                 |                      |                 |                 |                     |                       |                       |                |
| Morphine             | Drugs | Opioid Receptor     |                                   |                                   |                            |                 |                      |                 |                 |                     |                       |                       |                |
| Nalmefene            | Drugs | Opioid Receptor     | 20.0                              | 13.0                              | 8                          | >               | 300.0                | 0.0             | 0.0             |                     | 300.0                 | 300.0                 | 4              |
| Naltrexone           | Drugs | Opioid Receptor     | 7.2                               | -0.5                              | 16                         | >               | 300.0                | 0.0             | 0.0             |                     | 300.0                 | 300.0                 | 8              |
| Nemonapride          | Drugs | Dopaminergic GPCR   | 83.5                              | 68.4                              | 10                         | =               | 69.3                 | 13.6            | 14.8            | 11.5                | 118.0                 | 40.7                  | 4              |
| Nicergoline          | Drugs |                     |                                   |                                   |                            |                 |                      |                 |                 |                     |                       |                       |                |
| Nicotrol             | Drugs | Nicotinic Receptor  | 1.0                               | -4.2                              | 16                         | >               | 300.0                | 0.0             | 0.0             |                     | 300.0                 | 300.0                 | 5              |
| Nimodipine           | Drugs | Calcium Channels    | 11.2                              | 5.1                               | 16                         | =               | 103.1                | 11.6            | 4.8             | 9.1                 | 127.6                 | 83.3                  | 8              |
| Nortriptyline        | Drugs |                     |                                   |                                   |                            |                 |                      |                 |                 |                     |                       |                       |                |
| Olanzapine           | Drugs | Dopaminergic GPCR   | 43.1                              | 28.7                              | 18                         | >               | 296.1                | 4.4             | 2.4             | 3.9                 | 306.4                 | 286.1                 | 6              |
| Oxcarbazepine        | Drugs | Reuptake Inhibitors | 19.5                              | -0.5                              | 7                          | >               | 300.0                | 0.0             | 0.0             |                     | 300.0                 | 300.0                 | 3              |
| Oxycodone            | Drugs | Opioid Receptor     | 10.9                              | 3.2                               | 4                          |                 |                      |                 |                 |                     |                       |                       |                |
| Paliperidone         | Drugs | Dopaminergic GPCR   | 82.8                              | 73.9                              | 7                          | >               | 209.5                | 36.8            | 8.4             | 32.3                | 312.8                 | 140.3                 | 6              |
| Paroxetine           | Drugs | Serotonergic GPCR   | 73.7                              | 55.5                              | 15                         | =               | 28.2                 | 2.5             | 4.3             | 2.4                 | 34.7                  | 22.9                  | 8              |
| Pergolide            | Drugs | Dopaminergic GPCR   | 78.1                              | 73.2                              | 12                         | >               | 300.0                | 0.0             | 0.0             |                     | 300.0                 | 300.0                 | 4              |

| Pub-Name      | Set   | Target Mechanism    | Dof Inh<br>(% @<br>10uM)<br>Upp95 | Dof Inh<br>(% @<br>10uM)<br>Low95 | Dof Inh<br>(% @<br>10uM) N | THLE<br>IC50 OP | THLE<br>IC50<br>Mean | THLE<br>IC50 SD | THLE<br>IC50 CV | THLE<br>IC50<br>SEM | THLE<br>IC50<br>Upp95 | THLE<br>IC50<br>Low95 | THLE<br>IC50 N |
|---------------|-------|---------------------|-----------------------------------|-----------------------------------|----------------------------|-----------------|----------------------|-----------------|-----------------|---------------------|-----------------------|-----------------------|----------------|
| Perospirone   | Drugs | Dopaminergic GPCR   | 86.8                              | 76.2                              | 6                          | =               | 52.4                 | 5.0             | 10.3            | 4.1                 | 67.2                  | 40.8                  | 4              |
| phenytoin     | Drugs | Reuptake Inhibitors | 7.3                               | -5.2                              | 19                         | >               | 300.0                | 0.0             | 0.0             |                     | 300.0                 | 300.0                 | 8              |
| Piracetam     | Drugs |                     | 4.7                               | -1.1                              | 12                         | >               | 300.0                | 0.0             | 0.0             |                     | 300.0                 | 300.0                 | 6              |
| Pramipexole   | Drugs | Dopaminergic GPCR   | 2.9                               | -5.8                              | 15                         | >               | 300.0                | 0.0             | 0.0             |                     | 300.0                 | 300.0                 | 6              |
| Pregabalin    | Drugs | Calcium Channels    | -0.8                              | -7.6                              | 12                         |                 |                      |                 |                 |                     |                       |                       |                |
| Propofol      | Drugs |                     | 4.1                               | -2.1                              | 15                         | >               | 300.0                | 0.0             | 0.0             |                     | 300.0                 | 300.0                 | 8              |
| Propoxyphene  | Drugs |                     |                                   |                                   |                            |                 |                      |                 |                 |                     |                       |                       |                |
| Quazepam      | Drugs | Gaba Receptors      |                                   |                                   |                            |                 |                      |                 |                 |                     |                       |                       |                |
| Quetiapine    | Drugs | Serotonergic GPCR   | 19.9                              | 10.9                              | 15                         | >               | 215.4                | 66.2            | 9.2             | 42.6                | 346.4                 | 133.9                 | 7              |
| Ramelteon     | Drugs | Melatonin Receptor  | 2.8                               | -5.5                              | 12                         | >               | 300.0                | 0.0             | 0.0             |                     | 300.0                 | 300.0                 | 6              |
| Rasagiline    | Drugs | Enzyme              | 5.5                               | -17.8                             | 4                          | >               | 300.0                | 0.0             | 0.0             |                     | 300.0                 | 300.0                 | 3              |
| Reboxetine    | Drugs | Reuptake Inhibitors | 12.1                              | -0.2                              | 8                          | =               | 245.5                |                 | 0.0             |                     | 245.5                 | 245.5                 | 1              |
| Remifentanil  | Drugs | Opioid Receptor     |                                   |                                   |                            |                 |                      |                 |                 |                     |                       |                       |                |
| Riluzole      | Drugs | Reuptake Inhibitors | -1.3                              | -7.9                              | 9                          | =               | 90.8                 | 9.0             | 3.9             | 7.7                 | 110.3                 | 74.7                  | 9              |
| Rimonabant    | Drugs | Cannabinoids        | 28.7                              | 28.7                              | 11                         | =               | 61.4                 | 3.4             | 5.9             | 2.9                 | 70.0                  | 53.9                  | 5              |
| Risperidone   | Drugs | Dopaminergic GPCR   | 77.5                              | 72.4                              | 35                         | >               | 238.3                | 158.9           | 10.2            | 54.8                | 404.6                 | 140.4                 | 9              |
| Rivastigmine  | Drugs | Enzyme              | 5.1                               | -1.5                              | 16                         | >               | 300.0                | 0.0             | 0.0             |                     | 300.0                 | 300.0                 | 6              |
| Ropinirole    | Drugs | Dopaminergic GPCR   | 47.5                              | 42.0                              | 16                         | >               | 300.0                | 0.0             | 0.0             |                     | 300.0                 | 300.0                 | 6              |
| Ropivacaine   | Drugs |                     | 18.2                              | 5.3                               | 16                         | >               | 300.0                | 0.0             | 0.0             |                     | 300.0                 | 300.0                 | 5              |
| Selegiline    | Drugs | Enzyme              |                                   |                                   |                            |                 |                      |                 |                 |                     |                       |                       |                |
| Sertindole    | Drugs | Serotonergic GPCR   | 105.6                             | 99.7                              | 8                          |                 |                      |                 |                 |                     |                       |                       |                |
| Sertraline    | Drugs | Serotonergic GPCR   | 71.7                              | 56.3                              | 16                         | =               | 27.8                 | 1.8             | 3.2             | 1.9                 | 32.6                  | 23.7                  | 9              |
| Sinequan      | Drugs | Serotonergic GPCR   | 41.7                              | 41.7                              | 11                         | >               | 184.6                | 29.0            | 7.9             | 27.3                | 271.3                 | 125.6                 | 6              |
| Sulpiride     | Drugs | Dopaminergic GPCR   |                                   |                                   |                            |                 |                      |                 |                 |                     |                       |                       |                |
| Tacrine       | Drugs | Enzyme              | 57.4                              | 51.7                              | 19                         | >               | 202.3                | 19.1            | 0.6             | 11.7                | 228.5                 | 179.2                 | 56             |
| Talipexole    | Drugs | Dopaminergic GPCR   | 5.8                               | -0.7                              | 14                         | >               | 300.0                | 0.0             | 0.0             |                     | 300.0                 | 300.0                 | 5              |
| Terguride     | Drugs | Dopaminergic GPCR   |                                   |                                   |                            |                 |                      |                 |                 |                     |                       |                       |                |
| Thiopental    | Drugs | Gaba Receptors      |                                   |                                   |                            |                 |                      |                 |                 |                     |                       |                       |                |
| Tiagabine     | Drugs | Gaba Receptors      | 40.3                              | -2.2                              | 15                         | >               | 300.0                | 0.0             | 0.0             |                     | 300.0                 | 300.0                 | 5              |
| Tianeptine    | Drugs | Reuptake Inhibitors | 3.8                               | -6.6                              | 12                         |                 |                      |                 |                 |                     |                       |                       |                |
| Topiramate    | Drugs | Enzyme              | 1.8                               | 1.8                               | 11                         | >               | 300.0                | 0.0             | 0.0             |                     | 300.0                 | 300.0                 | 8              |
| Tramadol      | Drugs | Reuptake Inhibitors | 5.3                               | -6.6                              | 8                          | >               | 300.0                | 0.0             | 0.0             |                     | 300.0                 | 300.0                 | 4              |
| Trazodone     | Drugs | Serotonergic GPCR   |                                   |                                   |                            |                 |                      |                 |                 |                     |                       |                       |                |
| Tropisetron   | Drugs | Serotonergic GPCR   | 62.4                              | 52.9                              | 7                          | >               | 293.7                | 7.4             | 5.3             | 6.2                 | 314.3                 | 274.4                 | 4              |
| Valproic Acid | Drugs |                     | -1.0                              | -6.6                              | 19                         | >               | 300.0                | 0.0             | 0.0             |                     | 300.0                 | 300.0                 | 9              |
| Varenicline   | Drugs | Nicotinic Receptor  | 2.1                               | -3.0                              | 16                         | >               | 300.0                | 0.0             | 0.0             |                     | 300.0                 | 300.0                 | 6              |
| Venlafaxine   | Drugs | Serotonergic GPCR   | -1.2                              | -5.7                              | 16                         | >               | 291.2                | 10.0            | 3.7             | 8.6                 | 314.6                 | 269.7                 | 6              |

| Pub-Name      | Set        | Target Mechanism    | Dof Inh<br>(% @<br>10uM)<br>Upp95 | Dof Inh<br>(% @<br>10uM)<br>Low95 | Dof Inh<br>(% @<br>10uM) N | THLE<br>IC50 OP | THLE<br>IC50<br>Mean | THLE<br>IC50 SD | THLE<br>IC50 CV | THLE<br>IC50<br>SEM | THLE<br>IC50<br>Upp95 | THLE<br>IC50<br>Low95 | THLE<br>IC50 N |
|---------------|------------|---------------------|-----------------------------------|-----------------------------------|----------------------------|-----------------|----------------------|-----------------|-----------------|---------------------|-----------------------|-----------------------|----------------|
| Verapamil     | Drugs      | Calcium Channels    | 80.7                              | 72.1                              | 4                          | >               | 222.3                | 63.2            | 26.7            | 46.6                | 547.1                 | 90.3                  | 3              |
| Vigabatrin    | Drugs      | Gaba Receptors      | 3.0                               | -7.5                              | 8                          | >               | 300.0                | 0.0             | 0.0             |                     | 300.0                 | 300.0                 | 4              |
| Vinpocetine   | Drugs      |                     | 101.4                             | 97.5                              | 15                         | >               | 237.5                | 40.3            | 10.3            | 32.9                | 350.0                 | 161.1                 | 5              |
| Zaleplon      | Drugs      | Gaba Receptors      | -3.0                              | -6.5                              | 8                          |                 |                      |                 |                 |                     |                       |                       |                |
| Ziprasidone   | Drugs      | Dopaminergic GPCR   | 78.0                              | 78.0                              | 11                         | >               | 300.0                |                 | 0.0             |                     | 300.0                 | 300.0                 | 1              |
| Zolpidem      | Drugs      | Gaba Receptors      | 2.1                               | -2.1                              | 8                          |                 |                      |                 |                 |                     |                       |                       |                |
| Zonisamide    | Drugs      | Enzyme              | 1.3                               | -3.3                              | 19                         | >               | 300.0                | 0.0             | 0.0             |                     | 300.0                 | 300.0                 | 8              |
| Zotepine      | Drugs      | Serotonergic GPCR   | 88.9                              | 74.5                              | 12                         | =               | 29.8                 | 6.2             | 15.2            | 5.2                 | 52.3                  | 17.0                  | 4              |
| Candidate-001 | Candidates | Glutamate receptors |                                   |                                   |                            | >               | 300.0                | 0.0             | 0.0             |                     | 300.0                 | 300.0                 | 5              |
| Candidate-002 | Candidates | Reuptake Inhibitors | 29.6                              | 18.7                              | 20                         | =               | 55.6                 | 6.9             | 4.4             | 5.0                 | 68.2                  | 45.3                  | 9              |
| Candidate-003 | Candidates | Reuptake Inhibitors | 72.9                              | 61.3                              | 8                          | =               | 55.1                 | 10.2            | 5.4             | 7.9                 | 76.6                  | 39.6                  | 9              |
| Candidate-004 | Candidates | Serotonergic GPCR   |                                   |                                   |                            |                 |                      |                 |                 |                     |                       |                       |                |
| Candidate-005 | Candidates | Enzyme              |                                   |                                   |                            | >               | 240.7                | 35.5            | 6.4             | 28.5                | 319.7                 | 181.2                 | 7              |
| Candidate-006 | Candidates | Peptide GPCR        |                                   |                                   |                            | >               | 300.0                | 0.0             | 0.0             |                     | 300.0                 | 300.0                 | 6              |
| Candidate-007 | Candidates | Enzyme              | 9.1                               | 0.2                               | 15                         | >               | 253.9                | 45.8            | 6.1             | 30.5                | 338.7                 | 190.2                 | 8              |
| Candidate-008 | Candidates | Calcium Channels    | 26.2                              | 3.5                               | 4                          | >               | 300.0                | 0.0             | 0.0             |                     | 300.0                 | 300.0                 | 5              |
| Candidate-009 | Candidates | Nicotinic Receptor  | 5.2                               | -3.9                              | 15                         | >               | 300.0                | 0.0             | 0.0             |                     | 300.0                 | 300.0                 | 8              |
| Candidate-010 | Candidates | Opioid Receptor     | 54.2                              | 35.7                              | 7                          |                 |                      |                 |                 |                     |                       |                       |                |
| Candidate-011 | Candidates | Dopaminergic GPCR   | 86.9                              | 74.1                              | 8                          | >               | 300.0                | 0.0             | 0.0             |                     | 300.0                 | 300.0                 | 7              |
| Candidate-012 | Candidates | Peptide GPCR        | 30.1                              | 18.2                              | 4                          | =               | 92.9                 | 10.0            | 3.3             | 10.2                | 92.9                  | 92.9                  | 11             |
| Candidate-013 | Candidates | Enzyme              |                                   |                                   |                            | =               | 158.1                | 15.9            | 4.5             | 16.4                | 202.8                 | 123.2                 | 8              |
| Candidate-014 | Candidates | Opioid Receptor     | 51.9                              | -3.4                              | 3                          | >               | 300.0                | 0.0             | 0.0             |                     | 300.0                 | 300.0                 | 4              |
| Candidate-015 | Candidates | Nicotinic Receptor  | 32.1                              | 22.8                              | 12                         | >               | 300.0                | 0.0             | 0.0             |                     | 300.0                 | 300.0                 | 5              |
| Candidate-016 | Candidates | Gaba Receptors      | 15.3                              | 2.4                               | 14                         | >               | 291.4                | 6.2             | 1.8             | 5.6                 | 304.6                 | 278.8                 | 9              |
| Candidate-017 | Candidates | Enzyme              | 48.0                              | 39.5                              | 4                          |                 |                      |                 |                 |                     |                       |                       |                |
| Candidate-018 | Candidates | Cannabinoids        | 26.9                              | 17.3                              | 20                         | =               | 61.5                 | 7.0             | 4.2             | 5.9                 | 76.6                  | 49.4                  | 9              |
| Candidate-019 | Candidates | Peptide GPCR        |                                   |                                   |                            | =               | 45.8                 | 6.3             | 6.2             | 4.9                 | 59.3                  | 35.3                  | 7              |
| Candidate-020 | Candidates | Glutamate receptors | 87.7                              | 71.9                              | 4                          | =               | 197.1                | 19.4            | 7.9             | 18.6                | 256.7                 | 151.4                 | 5              |
| Candidate-021 | Candidates | Enzyme              | 10.8                              | -1.9                              | 19                         | >               | 265.1                | 30.8            | 4.3             | 22.9                | 323.4                 | 217.3                 | 9              |
| Candidate-022 | Candidates | Enzyme              | 64.2                              | 58.2                              | 8                          | =               | 43.3                 | 10.2            | 6.9             | 9.4                 | 73.0                  | 25.7                  | 8              |
| Candidate-023 | Candidates | Nicotinic Receptor  | 8.6                               | -0.9                              | 12                         | >               | 300.0                | 0.0             | 0.0             |                     | 300.0                 | 300.0                 | 8              |
| Candidate-024 | Candidates | Calcium Channels    | 13.7                              | -16.0                             | 3                          | >               | 300.0                | 0.0             | 0.0             |                     | 300.0                 | 300.0                 | 5              |
| Candidate-025 | Candidates | Reuptake Inhibitors | 67.0                              | 60.5                              | 4                          | =               | 29.9                 | 8.1             | 6.5             | 6.0                 | 47.6                  | 18.8                  | 9              |
| Candidate-026 | Candidates | Serotonergic GPCR   | 77.3                              | 57.3                              | 12                         | =               | 26.6                 | 1.8             | 3.3             | 1.8                 | 31.1                  | 22.7                  | 9              |
| Candidate-027 | Candidates | Serotonergic GPCR   | 34.2                              | 28.9                              | 4                          | >               | 244.4                | 25.0            | 3.6             | 20.8                | 292.1                 | 204.5                 | 10             |
| Candidate-028 | Candidates | Histaminergic GPCR  | 12.1                              | 2.3                               | 8                          | >               | 300.0                | 0.0             | 0.0             |                     | 300.0                 | 300.0                 | 9              |
| Candidate-029 | Candidates | Glutamate receptors |                                   |                                   |                            | >               | 300.0                | 0.0             | 0.0             |                     | 300.0                 | 300.0                 | 7              |

| Pub-Name      | Set        | Target Mechanism    | Dof Inh<br>(% @<br>10uM)<br>Upp95 | Dof Inh<br>(% @<br>10uM)<br>Low95 | Dof Inh<br>(% @<br>10uM) N | THLE<br>IC50 OP | THLE<br>IC50<br>Mean | THLE<br>IC50 SD | THLE<br>IC50 CV | THLE<br>IC50<br>SEM | THLE<br>IC50<br>Upp95 | THLE<br>IC50<br>Low95 | THLE<br>IC50 N |
|---------------|------------|---------------------|-----------------------------------|-----------------------------------|----------------------------|-----------------|----------------------|-----------------|-----------------|---------------------|-----------------------|-----------------------|----------------|
| Candidate-030 | Candidates | Peptide GPCR        |                                   |                                   |                            | >               | 284.0                | 19.4            | 4.4             | 15.5                | 323.9                 | 249.1                 | 7              |
| Candidate-031 | Candidates | Serotonergic GPCR   | 6.6                               | 2.2                               | 20                         | >               | 300.0                | 0.0             | 0.0             |                     | 300.0                 | 300.0                 | 5              |
| Candidate-032 | Candidates | Gaba Receptors      | 5.0                               | -13.0                             | 7                          | >               | 300.0                | 0.0             | 0.0             |                     | 300.0                 | 300.0                 | 8              |
| Candidate-033 | Candidates | Opioid Receptor     | 75.6                              | 69.0                              | 36                         | >               | 136.6                | 22.3            | 2.5             | 18.7                | 182.1                 | 102.5                 | 17             |
| Candidate-034 | Candidates | Reuptake Inhibitors | 67.9                              | 67.9                              | 11                         | =               | 48.0                 | 4.6             | 3.9             | 4.0                 | 58.2                  | 39.6                  | 9              |
| Candidate-035 | Candidates | Calcium Channels    | 19.3                              | -0.5                              | 7                          | >               | 300.0                | 0.0             | 0.0             |                     | 300.0                 | 300.0                 | 5              |
| Candidate-036 | Candidates | Peptide GPCR        |                                   |                                   |                            | >               | 278.2                | 27.9            | 5.3             | 21.0                | 333.5                 | 232.0                 | 7              |
| Candidate-037 | Candidates | Gaba Receptors      | 12.3                              | 0.9                               | 15                         | >               | 298.0                | 2.2             | 1.2             | 2.0                 | 302.8                 | 293.3                 | 8              |
| Candidate-038 | Candidates | Serotonergic GPCR   |                                   |                                   |                            | >               | 300.0                | 0.0             | 0.0             |                     | 300.0                 | 300.0                 | 8              |
| Candidate-039 | Candidates | Glutamate receptors | 87.0                              | 79.5                              | 12                         | =               | 31.6                 | 2.6             | 4.1             | 2.6                 | 38.7                  | 25.9                  | 8              |
| Candidate-040 | Candidates | Enzyme              |                                   |                                   |                            |                 |                      |                 |                 |                     |                       |                       |                |
| Candidate-041 | Candidates | Peptide GPCR        | 62.9                              | 53.5                              | 4                          | >               | 80.4                 | 18.0            | 5.9             | 20.5                | 144.6                 | 44.7                  | 9              |
| Candidate-042 | Candidates | Serotonergic GPCR   | 49.9                              | 42.0                              | 8                          | =               | 87.7                 | 6.4             | 3.4             | 5.9                 | 102.4                 | 75.0                  | 9              |
| Candidate-043 | Candidates | Peptide GPCR        | 39.0                              | 10.9                              | 4                          | >               | 300.0                | 0.0             | 0.0             |                     | 300.0                 | 300.0                 | 8              |
| Candidate-044 | Candidates | Serotonergic GPCR   | 45.4                              | 32.8                              | 16                         | =               | 37.3                 | 3.0             | 3.6             | 3.0                 | 44.8                  | 31.1                  | 9              |
| Candidate-045 | Candidates | Cannabinoids        | 31.5                              | 7.3                               | 3                          | =               | 108.5                | 10.3            | 10.3            | 8.3                 | 138.6                 | 84.9                  | 4              |
| Candidate-046 | Candidates | Serotonergic GPCR   |                                   |                                   |                            | =               | 42.7                 | 3.0             | 0.9             | 3.3                 | 50.2                  | 36.3                  | 31             |
| Candidate-047 | Candidates | Calcium Channels    | -0.1                              | -9.3                              | 4                          | >               | 300.0                | 0.0             | 0.0             |                     | 300.0                 | 300.0                 | 7              |
| Candidate-048 | Candidates | Dopaminergic GPCR   | 96.9                              | 92.9                              | 8                          | =               | 64.6                 | 10.3            | 8.0             | 11.5                | 102.7                 | 40.6                  | 6              |
| Candidate-049 | Candidates | Serotonergic GPCR   | 90.4                              | 70.6                              | 6                          | =               | 34.9                 | 3.0             | 4.2             | 2.6                 | 41.8                  | 29.1                  | 8              |
| Candidate-050 | Candidates | Gaba Receptors      | 14.9                              | 14.9                              | 11                         | >               | 167.7                | 19.7            | 4.9             | 19.6                | 222.1                 | 126.6                 | 8              |
| Candidate-051 | Candidates | Reuptake Inhibitors | 15.8                              | 4.5                               | 8                          | =               | 36.1                 | 4.0             | 5.6             | 3.7                 | 46.2                  | 28.2                  | 7              |
| Candidate-052 | Candidates | Enzyme              | 14.0                              | -1.8                              | 4                          | =               | 126.9                | 4.1             | 4.5             | 3.8                 | 138.1                 | 116.6                 | 5              |
| Candidate-053 | Candidates | Nicotinic Receptor  | 17.8                              | 0.2                               | 4                          | >               | 300.0                | 0.0             | 0.0             |                     | 300.0                 | 300.0                 | 7              |
| Candidate-054 | Candidates | Opioid Receptor     | 90.7                              | 58.5                              | 4                          | =               | 133.6                | 46.2            | 14.7            | 30.5                | 253.0                 | 70.5                  | 5              |
| Candidate-055 | Candidates | Enzyme              | 98.6                              | 98.6                              | 11                         | >               | 300.0                | 0.0             | 0.0             |                     | 300.0                 | 300.0                 | 8              |
| Candidate-056 | Candidates | Enzyme              | 30.3                              | 30.3                              | 11                         | =               | 51.2                 | 8.0             | 4.9             | 6.1                 | 67.3                  | 38.9                  | 9              |
| Candidate-057 | Candidates | Dopaminergic GPCR   | 4.4                               | -7.7                              | 10                         | >               | 289.1                | 13.0            | 2.6             | 10.7                | 314.8                 | 265.5                 | 9              |
| Candidate-058 | Candidates | Peptide GPCR        |                                   |                                   |                            | >               | 300.0                | 0.0             | 0.0             |                     | 300.0                 | 300.0                 | 4              |
| Candidate-059 | Candidates | Dopaminergic GPCR   |                                   |                                   |                            | =               | 18.5                 |                 | 0.0             |                     | 18.5                  | 18.5                  | 1              |
| Candidate-060 | Candidates | Serotonergic GPCR   | 77.0                              | 64.1                              | 15                         | >               | 300.0                | 0.0             | 0.0             |                     | 300.0                 | 300.0                 | 7              |
| Candidate-061 | Candidates | Histaminergic GPCR  | 5.0                               | 1.3                               | 12                         | >               | 267.5                | 45.5            | 5.9             | 29.4                | 348.3                 | 205.5                 | 8              |
| Candidate-062 | Candidates | Dopaminergic GPCR   | 61.4                              | 56.7                              | 4                          | >               | 300.0                |                 | 0.0             |                     | 300.0                 | 300.0                 | 1              |
| Candidate-063 | Candidates | Nicotinic Receptor  | 10.0                              | -2.5                              | 8                          | >               | 300.0                | 0.0             | 0.0             |                     | 300.0                 | 300.0                 | 5              |
| Candidate-064 | Candidates | Serotonergic GPCR   | 23.5                              | 15.3                              | 12                         | =               | 48.3                 | 10.1            | 6.5             | 6.6                 | 67.0                  | 34.9                  | 8              |
| Candidate-065 | Candidates | Peptide GPCR        | 16.0                              | -21.0                             | 3                          | =               | 48.4                 | 16.8            | 9.8             | 10.5                | 81.5                  | 28.8                  | 7              |
| Candidate-066 | Candidates | Serotonergic GPCR   | 32.4                              | 20.2                              | 4                          | >               | 257.1                | 44.8            | 8.3             | 31.7                | 354.3                 | 186.6                 | 6              |



| Pub-Name      | Set        | Target Mechanism    | Dof Inh<br>(% @<br>10uM)<br>Upp95 | Dof Inh<br>(% @<br>10uM)<br>Low95 | Dof Inh<br>(% @<br>10uM) N | THLE<br>IC50 OP | THLE<br>IC50<br>Mean | THLE<br>IC50 SD | THLE<br>IC50 CV | THLE<br>IC50<br>SEM | THLE<br>IC50<br>Upp95 | THLE<br>IC50<br>Low95 | THLE<br>IC50 N |
|---------------|------------|---------------------|-----------------------------------|-----------------------------------|----------------------------|-----------------|----------------------|-----------------|-----------------|---------------------|-----------------------|-----------------------|----------------|
| Candidate-067 | Candidates | Dopaminergic GPCR   | 68.7                              | 4.4                               | 8                          | =               | 26.8                 | 5.3             | 8.9             | 4.4                 | 40.9                  | 17.6                  | 6              |
| Candidate-068 | Candidates | Serotonergic GPCR   | 19.3                              | -2.9                              | 7                          | >               | 300.0                | 0.0             | 0.0             |                     | 300.0                 | 300.0                 | 8              |
| Candidate-069 | Candidates | Reuptake Inhibitors |                                   |                                   |                            | =               | 75.4                 | 4.8             | 3.2             | 4.7                 | 87.0                  | 65.3                  | 9              |
| Candidate-070 | Candidates | Dopaminergic GPCR   | 38.3                              | -29.8                             | 2                          | >               | 300.0                | 0.0             | 0.0             |                     | 300.0                 | 300.0                 | 5              |
| Candidate-071 | Candidates | Reuptake Inhibitors | 33.8                              | 21.7                              | 8                          | >               | 239.3                | 133.5           | 10.7            | 54.1                | 411.7                 | 139.1                 | 8              |
| Candidate-072 | Candidates | Dopaminergic GPCR   | 97.0                              | 97.0                              | 11                         | >               | 300.0                | 0.0             | 0.0             |                     | 300.0                 | 300.0                 | 9              |
| Candidate-073 | Candidates | Gaba Receptors      | -0.3                              | -8.3                              | 16                         | >               | 262.5                | 74.2            | 5.3             | 35.0                | 262.5                 | 262.5                 | 11             |
| Candidate-074 | Candidates | Peptide GPCR        |                                   |                                   |                            | >               | 247.7                | 29.0            | 4.3             | 22.8                | 306.0                 | 200.5                 | 9              |
| Candidate-075 | Candidates | Nicotinic Receptor  | 22.2                              | 4.4                               | 8                          | >               | 300.0                | 0.0             | 0.0             |                     | 300.0                 | 300.0                 | 6              |
| Candidate-076 | Candidates | Nicotinic Receptor  | 9.4                               | -1.6                              | 20                         | >               | 300.0                | 0.0             | 0.0             |                     | 300.0                 | 300.0                 | 9              |
| Candidate-077 | Candidates | Gaba Receptors      | 2.0                               | -9.9                              | 14                         | =               | 142.6                | 9.1             | 3.2             | 8.4                 | 163.3                 | 124.5                 | 9              |
| Candidate-078 | Candidates | Reuptake Inhibitors | 11.4                              | 6.2                               | 16                         | >               | 175.6                | 12.1            | 2.9             | 12.7                | 204.5                 | 150.8                 | 10             |
| Candidate-079 | Candidates | Calcium Channels    | 115.7                             | -82.5                             | 2                          | >               | 300.0                | 0.0             | 0.0             |                     | 300.0                 | 300.0                 | 5              |
| Candidate-080 | Candidates | Dopaminergic GPCR   |                                   |                                   |                            | =               | 54.6                 | 5.4             | 3.9             | 5.5                 | 68.8                  | 43.3                  | 9              |
| Candidate-081 | Candidates | Serotonergic GPCR   | 44.6                              | 33.1                              | 8                          | =               | 183.4                | 17.3            | 4.4             | 17.1                | 229.5                 | 146.5                 | 8              |
| Candidate-082 | Candidates | Gaba Receptors      | 2.3                               | -3.0                              | 20                         | >               | 287.1                | 16.0            | 2.6             | 12.6                | 314.9                 | 261.7                 | 10             |
| Candidate-083 | Candidates | Cannabinoids        | 30.8                              | -4.8                              | 4                          | =               | 82.6                 | 9.8             | 4.3             | 8.6                 | 105.1                 | 65.0                  | 9              |
| Candidate-084 | Candidates | Gaba Receptors      | 27.1                              | 12.0                              | 12                         | >               | 270.8                | 41.7            | 5.6             | 27.7                | 346.1                 | 211.8                 | 8              |
| Candidate-085 | Candidates | Reuptake Inhibitors |                                   |                                   |                            | >               | 300.0                | 0.0             | 0.0             | 0.0                 | 300.0                 | 300.0                 | 10             |
| Candidate-086 | Candidates | Muscarinic Receptor | 34.3                              | 14.5                              | 4                          | >               | 225.7                | 20.0            | 7.4             | 18.5                | 283.8                 | 179.5                 | 5              |
| Candidate-087 | Candidates | Cannabinoids        | -0.8                              | -12.8                             | 7                          | >               | 284.3                | 19.0            | 4.3             | 15.3                | 323.4                 | 250.0                 | 7              |
| Candidate-088 | Candidates | Dopaminergic GPCR   |                                   |                                   |                            | >               | 300.0                | 0.0             | 0.0             |                     | 300.0                 | 300.0                 | 4              |
| Candidate-089 | Candidates | Enzyme              | -0.8                              | -0.8                              | 11                         | >               | 300.0                | 0.0             | 0.0             |                     | 300.0                 | 300.0                 | 7              |
| Candidate-090 | Candidates | Glutamate receptors | -0.7                              | -9.8                              | 8                          | >               | 277.1                | 19.4            | 3.3             | 15.6                | 315.5                 | 243.4                 | 9              |
| Candidate-091 | Candidates | Gaba Receptors      | 41.2                              | 31.1                              | 12                         | =               | 175.4                | 17.6            | 4.0             | 16.6                | 217.9                 | 141.1                 | 9              |
| Candidate-092 | Candidates | Reuptake Inhibitors | 36.4                              | 19.7                              | 4                          | >               | 121.3                | 23.0            | 5.4             | 22.6                | 186.0                 | 79.1                  | 9              |
| Candidate-093 | Candidates | Muscarinic Receptor | 26.7                              | 19.3                              | 4                          | =               | 77.3                 | 14.5            | 10.8            | 12.2                | 120.1                 | 49.8                  | 5              |
| Candidate-094 | Candidates | Dopaminergic GPCR   | 97.9                              | 90.8                              | 10                         | >               | 287.5                | 7.9             | 1.8             | 7.1                 | 302.8                 | 273.0                 | 10             |
| Candidate-095 | Candidates | Gaba Receptors      | 8.3                               | -8.1                              | 10                         | >               | 156.1                | 17.2            | 4.1             | 16.8                | 199.8                 | 121.9                 | 9              |
| Candidate-096 | Candidates | Serotonergic GPCR   |                                   |                                   |                            |                 |                      |                 |                 |                     |                       |                       |                |
| Candidate-097 | Candidates | Reuptake Inhibitors | 48.6                              | 39.8                              | 16                         | =               | 64.9                 | 2.5             | 2.8             | 2.4                 | 70.9                  | 59.5                  | 8              |
| Candidate-098 | Candidates | Enzyme              | 54.0                              | 32.2                              | 15                         | =               | 34.7                 | 5.2             | 4.3             | 4.3                 | 45.0                  | 26.8                  | 10             |
| Candidate-099 | Candidates | Peptide GPCR        | 71.5                              | 71.5                              | 11                         | >               | 150.2                | 27.4            | 6.1             | 23.0                | 216.8                 | 104.0                 | 8              |
| Candidate-100 | Candidates | Enzyme              | 26.8                              | 9.8                               | 4                          | =               | 117.9                | 47.0            | 21.0            | 35.0                | 304.8                 | 45.6                  | 4              |
| Candidate-101 | Candidates | Dopaminergic GPCR   | 74.1                              | 49.8                              | 4                          | =               | 41.8                 | 6.7             | 13.4            | 5.8                 | 65.2                  | 26.8                  | 4              |
| Candidate-102 | Candidates | Serotonergic GPCR   | 93.5                              | 81.9                              | 12                         | >               | 111.6                | 37.2            | 7.2             | 28.9                | 202.5                 | 61.5                  | 9              |
| Candidate-103 | Candidates | Dopaminergic GPCR   | 91.2                              | 82.5                              | 4                          | >               | 131.5                | 64.3            | 17.5            | 44.4                | 338.5                 | 51.1                  | 5              |

| Pub-Name      | Set        | Target Mechanism   | Dof Inh<br>(% @<br>10uM)<br>Upp95 | Dof Inh<br>(% @<br>10uM)<br>Low95 | Dof Inh<br>(% @<br>10uM) N | THLE<br>IC50 OP | THLE<br>IC50<br>Mean | THLE<br>IC50 SD | THLE<br>IC50 CV | THLE<br>IC50<br>SEM | THLE<br>IC50<br>Upp95 | THLE<br>IC50<br>Low95 | THLE<br>IC50<br>N |
|---------------|------------|--------------------|-----------------------------------|-----------------------------------|----------------------------|-----------------|----------------------|-----------------|-----------------|---------------------|-----------------------|-----------------------|-------------------|
| Candidate-104 | Candidates | Peptide GPCR       | 22.5                              | 16.6                              | 4                          | >               | 173.9                | 31.4            | 4.7             | 25.4                | 236.3                 | 128.0                 | 10                |
| Candidate-105 | Candidates | Gaba Receptors     | 6.2                               | 6.2                               | 11                         | >               | 300.0                | 0.0             | 0.0             | 300.0               | 300.0                 | 300.0                 | 8                 |
| Candidate-106 | Candidates | Peptide GPCR       | 15.0                              | -2.5                              | 4                          | =               | 78.6                 | 9.3             | 8.6             | 8.4                 | 106.1                 | 58.3                  | 5                 |
| Candidate-107 | Candidates | Calcium Channels   | 0.4                               | -10.8                             | 3                          |                 |                      |                 |                 |                     |                       |                       |                   |
| Candidate-108 | Candidates | Nicotinic Receptor | 6.8                               | -3.4                              | 10                         | >               | 300.0                | 0.0             | 0.0             |                     | 300.0                 | 300.0                 | 9                 |
